# Supplementary material for: Electrochemical rhodium catalysed alkyne annulation with pyrazoles through anodic oxidation – a metal oxidant/additive free methodology
Source: Royal Society of Chemistry journal article supplement (doi:10.1039/d2ob02306g), 2023-01-01
Supplement: d2ob02306g1.pdf [file d2ob02306g1.pdf]

## Electronic Supplementary Material (ESI)

### **Electrochemical Rhodium Catalyzed Alkyne Annulation with Pyrazoles through Anodic Oxidation – a Metal Oxidant/Additive Free Methodology**

Subban Kathiravan\* and Prasad Anaspure

Bioorganic & Biophysical Chemistry Laboratory, Linnaeus University Centre for  
Biomaterials Chemistry, Department of Chemistry & Biomedical Sciences,  
Linnaeus University, Kalmar SE-39182, Sweden  
[suppan.kathiravan@lnu.se](mailto:suppan.kathiravan@lnu.se)

| <b>Table of Content:</b>                | <b>Page No</b> |
|-----------------------------------------|----------------|
| 1. General considerations               | 3              |
| 2. Description of electrochemical setup | 4              |
| 4. E-factor calculation                 | 7              |
| 5. Cyclic voltammetry study             | 8              |
| 4. Copies of Spectra                    | 9              |
| 5.Reference                             | 88             |

## 1. General considerations:

All the catalytic reactions were conducted under nitrogen atmosphere by using standard Schlenk technique. The solvents and chemicals were purchased from Aldrich and Chemtronica in Sweden. All glassware's dried overnight at 120°C and if needed flame dried further. Column chromatography was performed on silica gel (Carlo Erba, 60Å). Thin layer chromatography was performed on a silica gel precoated on aluminum foils with fluorescence indicator (254 nm). Preparative thin layer chromatography was performed on plates available at Aldrich (Analtech, UV<sub>254</sub> 20×20 cm, 500 micron). Yields refer to isolated compounds and <sup>1</sup>H NMR determined their purity.

Nuclear magnetic resonance (NMR) spectroscopy was performed at 400 MHz (<sup>1</sup>H NMR), 101 MHz (<sup>13</sup>C NMR), and 376 MHz (<sup>19</sup>F NMR) on Bruker Ascend 400 instrument. Chemical shifts (δ) are provided in ppm and spectra referred to non-deuterated solvent signal.

Mass spectra (HRMS) were obtained from Lund University Kemi Centrum Mass Spectrometry facility. Instrument: Waters XEVO-G2 QTOF. ESI+: Capillary voltage 3 kV, Cone voltage 35V, Ext 4, Source Temp 120, Des Temp 300, Cone gas 50, Des gas 400. Continuum resolution mode, m/z 100-1200, manual lock mass correction by Leucine Enkephalin (m/z 556.2771).

Electrochemical reactions were carried out in undivided electrochemical cells (50 mL) using pre-dried glassware. RVC electrodes were obtained from SGL carbon, Wiesbaden, Germany and used with the following dimensions: (30 mm × 5 mm). Platinum electrodes (99.9 %) were

obtained from ChemPur Karlsruhe, Germany and used with the following dimensions: (10 mm × 6 mm). Ni foam electrodes were obtained from RECEMAT BV, The Netherlands and used with the following dimensions (30 mm × 6 mm). Electrocatalysis was conducted using GAMRY instruments Reference 600 & 600 plus potentiostat in constant current mode.

Substituted pyrazoles **1** were prepared according to the reported methods.<sup>1</sup> Alkyne **2a**, **4g-4k** was commercially available and used as received. Alkynes **4a-f** were synthesized according to the reported methods.<sup>2</sup>

## 2. Description of electrochemical setup

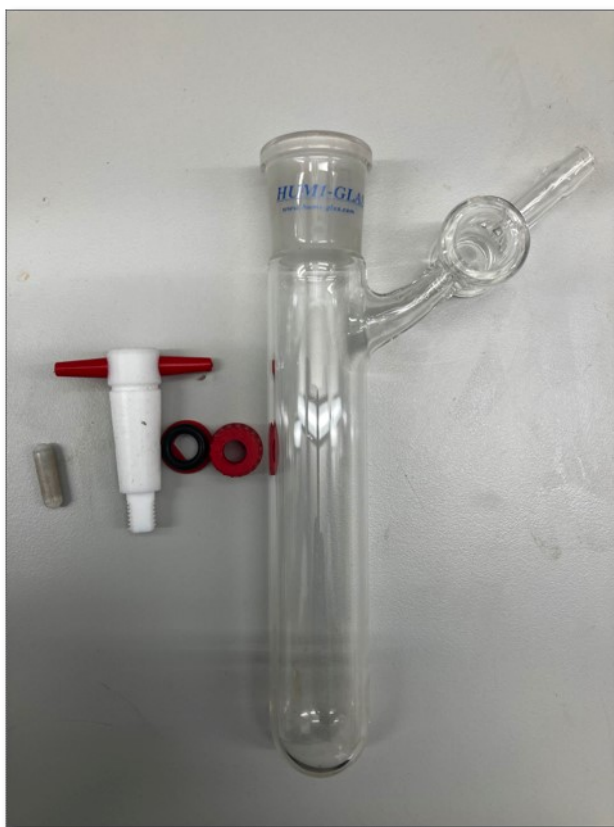

Figure S1: Glassware setup for electrochemical reactions

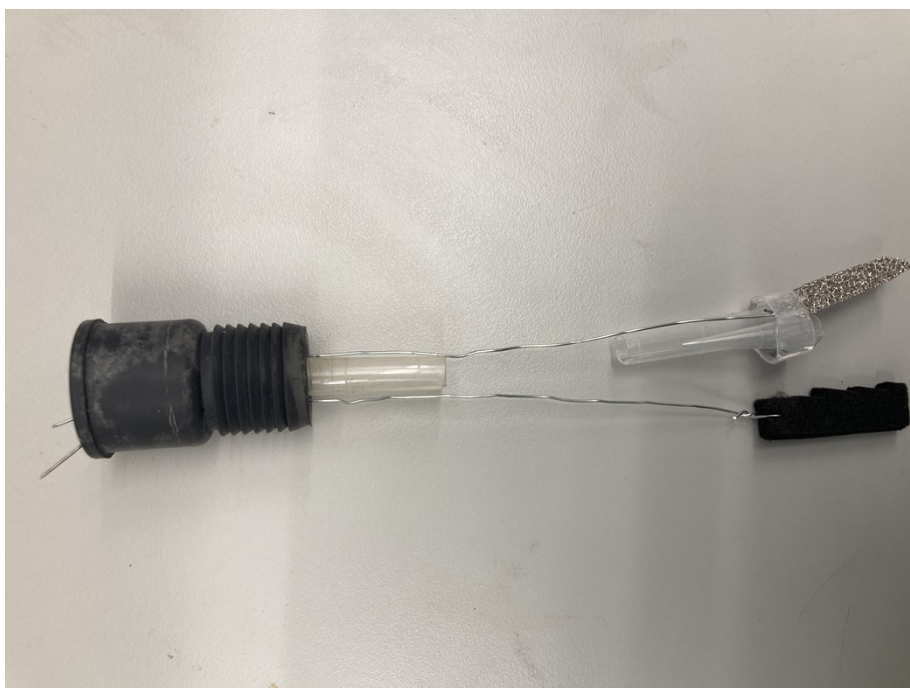

**Figure S2: Arrangement of RVC and Ni electrodes**

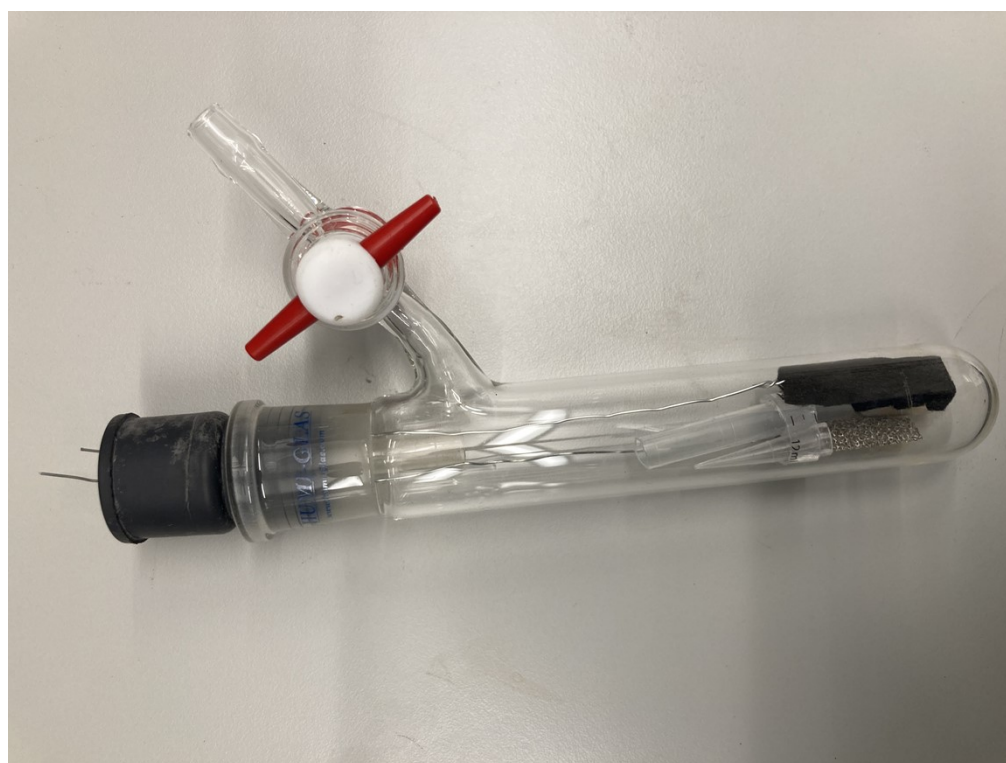

**Figure S3: Final setup for reactions**

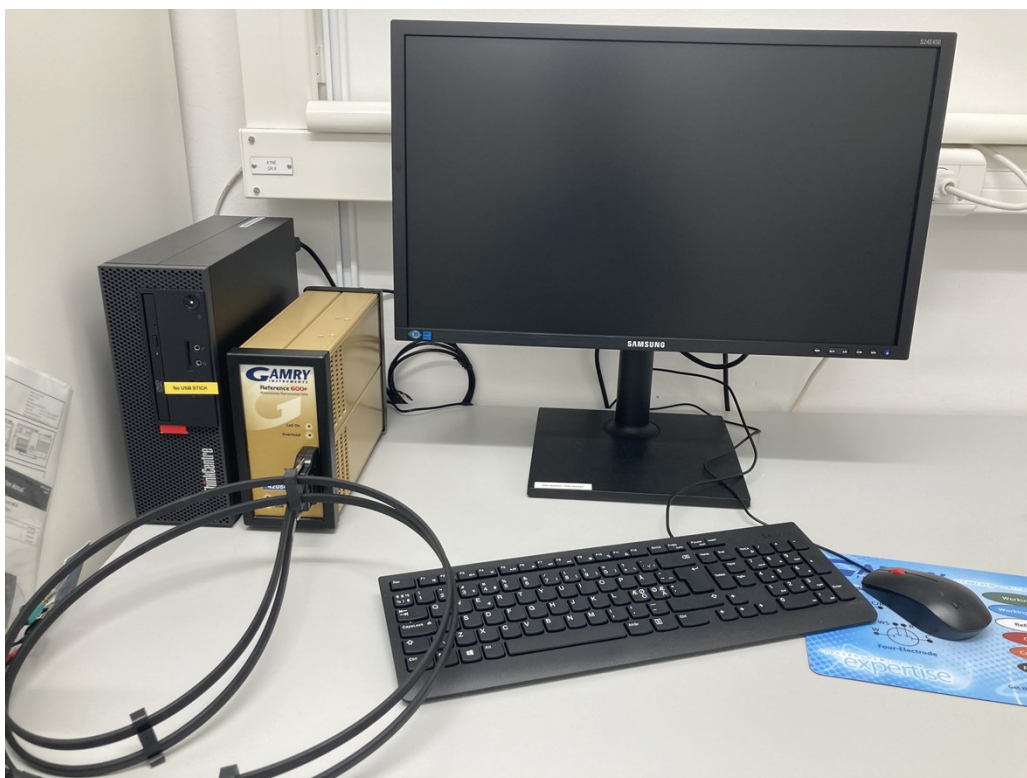

**Figure S4: Electrochemical station with GAMRY 600 Plus potentiostat**

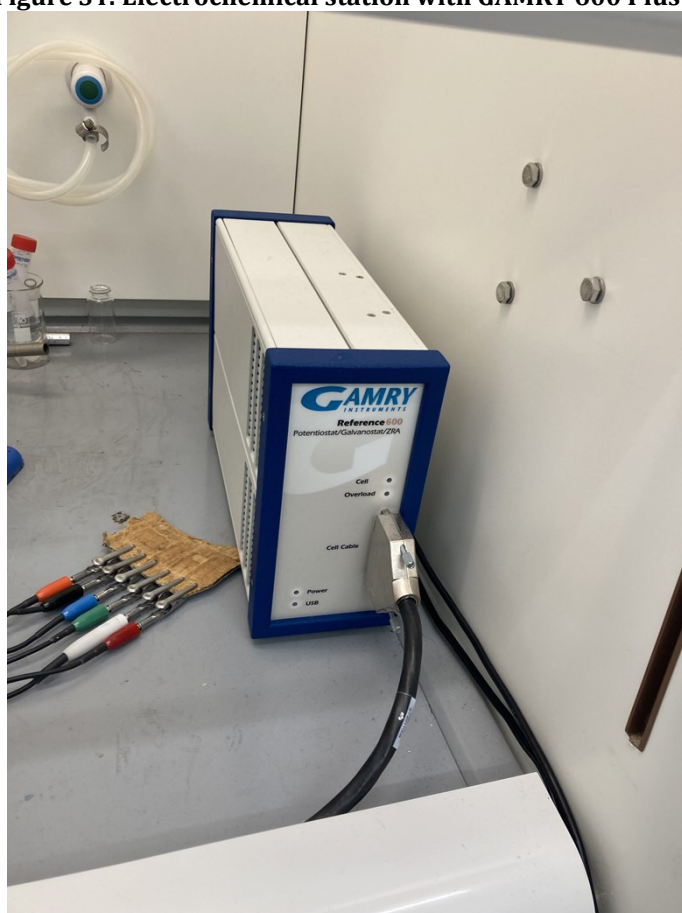

**Figure S5: Electrochemical station with GAMRY 600 potentiostat**

## 4. E-factor calculation

To evaluate the efficacy of this green methodology for the alkyne annulation with pyrazole, we undertook a study to calculate the E-factor associated with this reaction and found the total amount of 18.97, which is quite good, factor in comparison to the conventional methods.

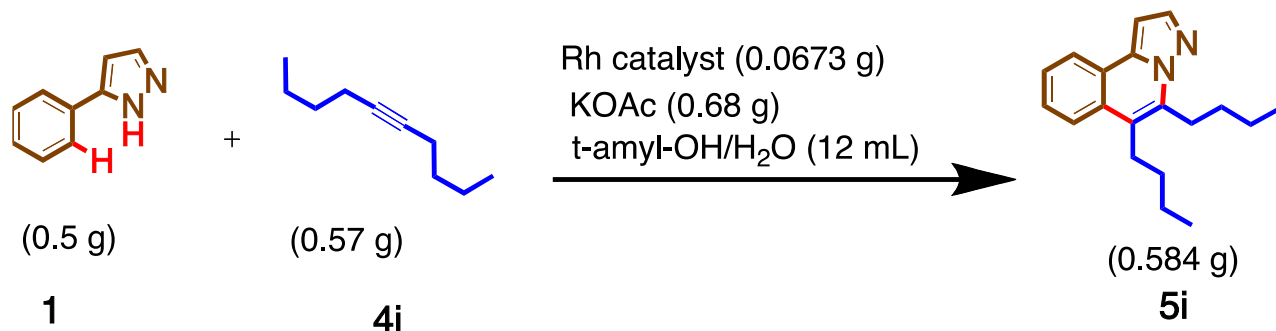

Total amount of reactants: 0.5 g + 0.57 g + 0.0673 g + 0.68 g + 9.849 g = 11.663 g

Amount of final product: 0.584 g

Amount of waste: (11.663-0.584) g = 11.079 g

E-factor = Amount of waste/Amount of product = 11.079/0.584 = 18.97

## 5. Cyclic voltammetry studies

Cyclic voltammetry were recorded with a Gamry potentiostat at room temperature. A Ni foam plate was used as counter electrode, a RVC electrode was used as the working electrode, and Ag wire electrode was used as the reference. The measurements were carried out at a scan rate of 100 mV/s.

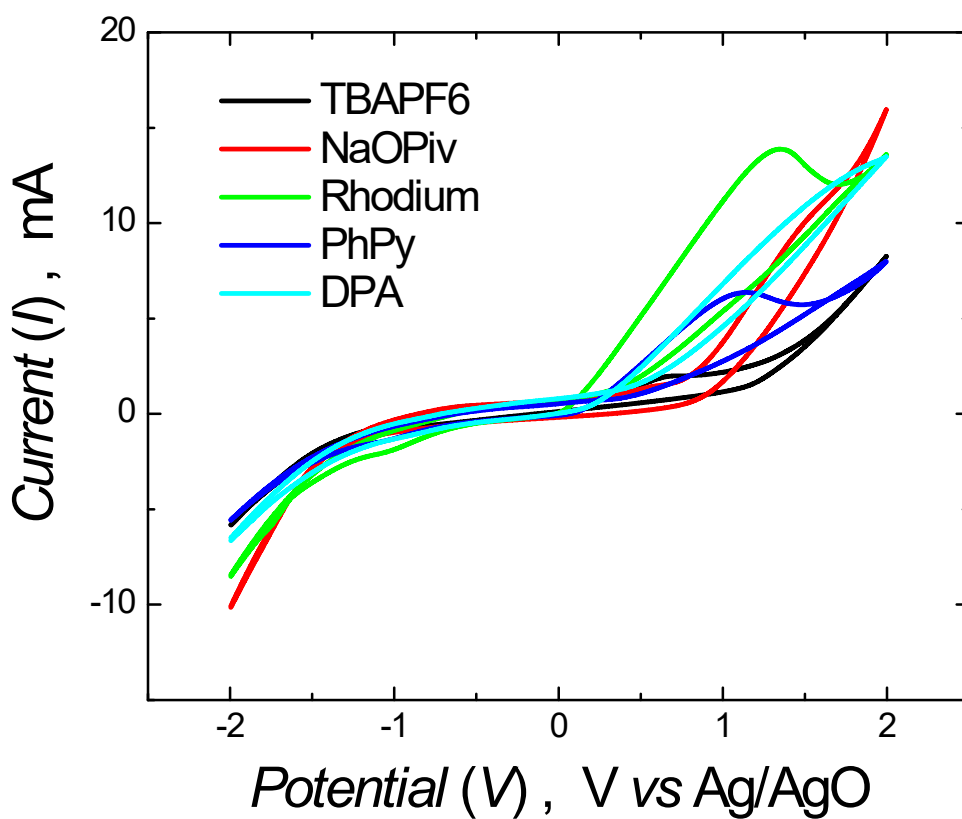

Figure S7: Cyclic voltammetry at 100 mV/s:  $n\text{Bu}_4\text{NPF}_6$  (100 mM in MeCN), concentration of substrates (KOAc 100 mM),  $[\text{Cp}^*\text{RhCl}_2]_2$  catalyst - 5 mM, 2-phenyl pyrazole - 10 mM, diphenylacetylene - 10 mM.



## 6. Copies of Spectra

Compound 3a, <sup>1</sup>H NMR, CDCl<sub>3</sub>, 400 MHz

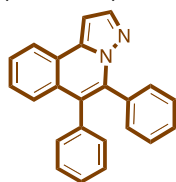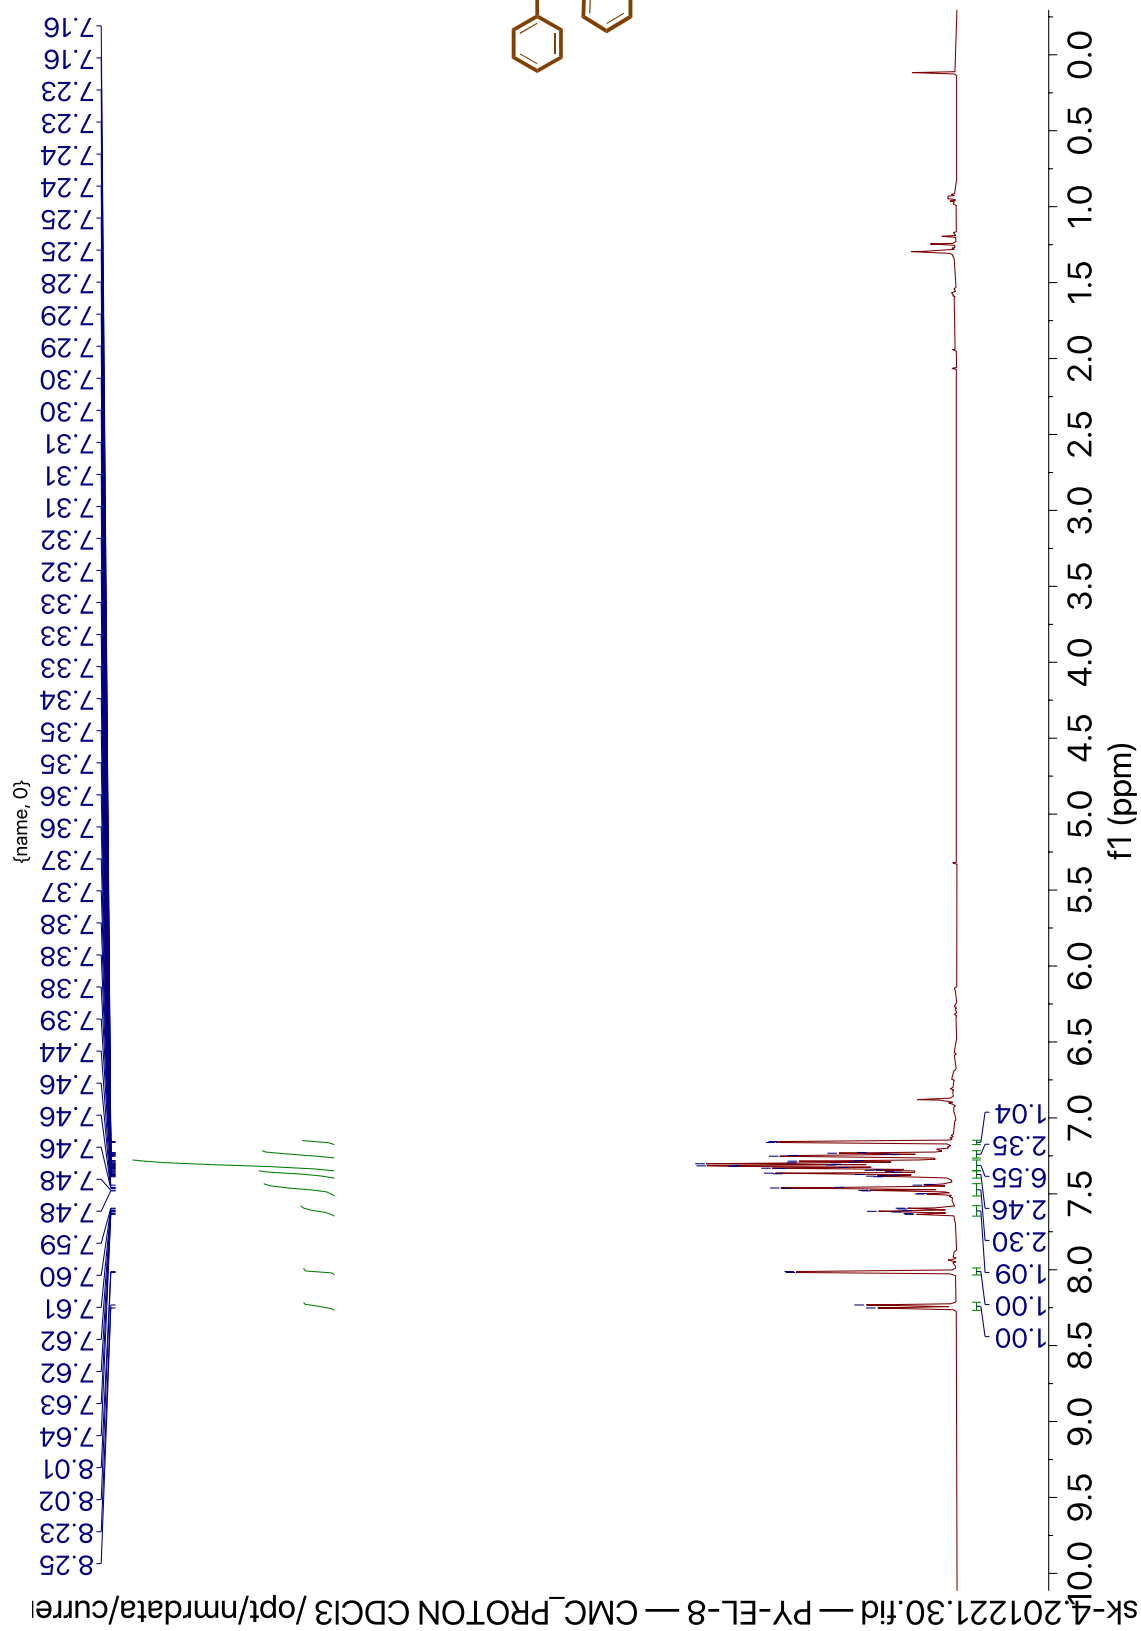

Compound 3a,  $^{13}\text{C}$  NMR,  $\text{CDCl}_3$ , 101 MHz

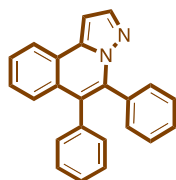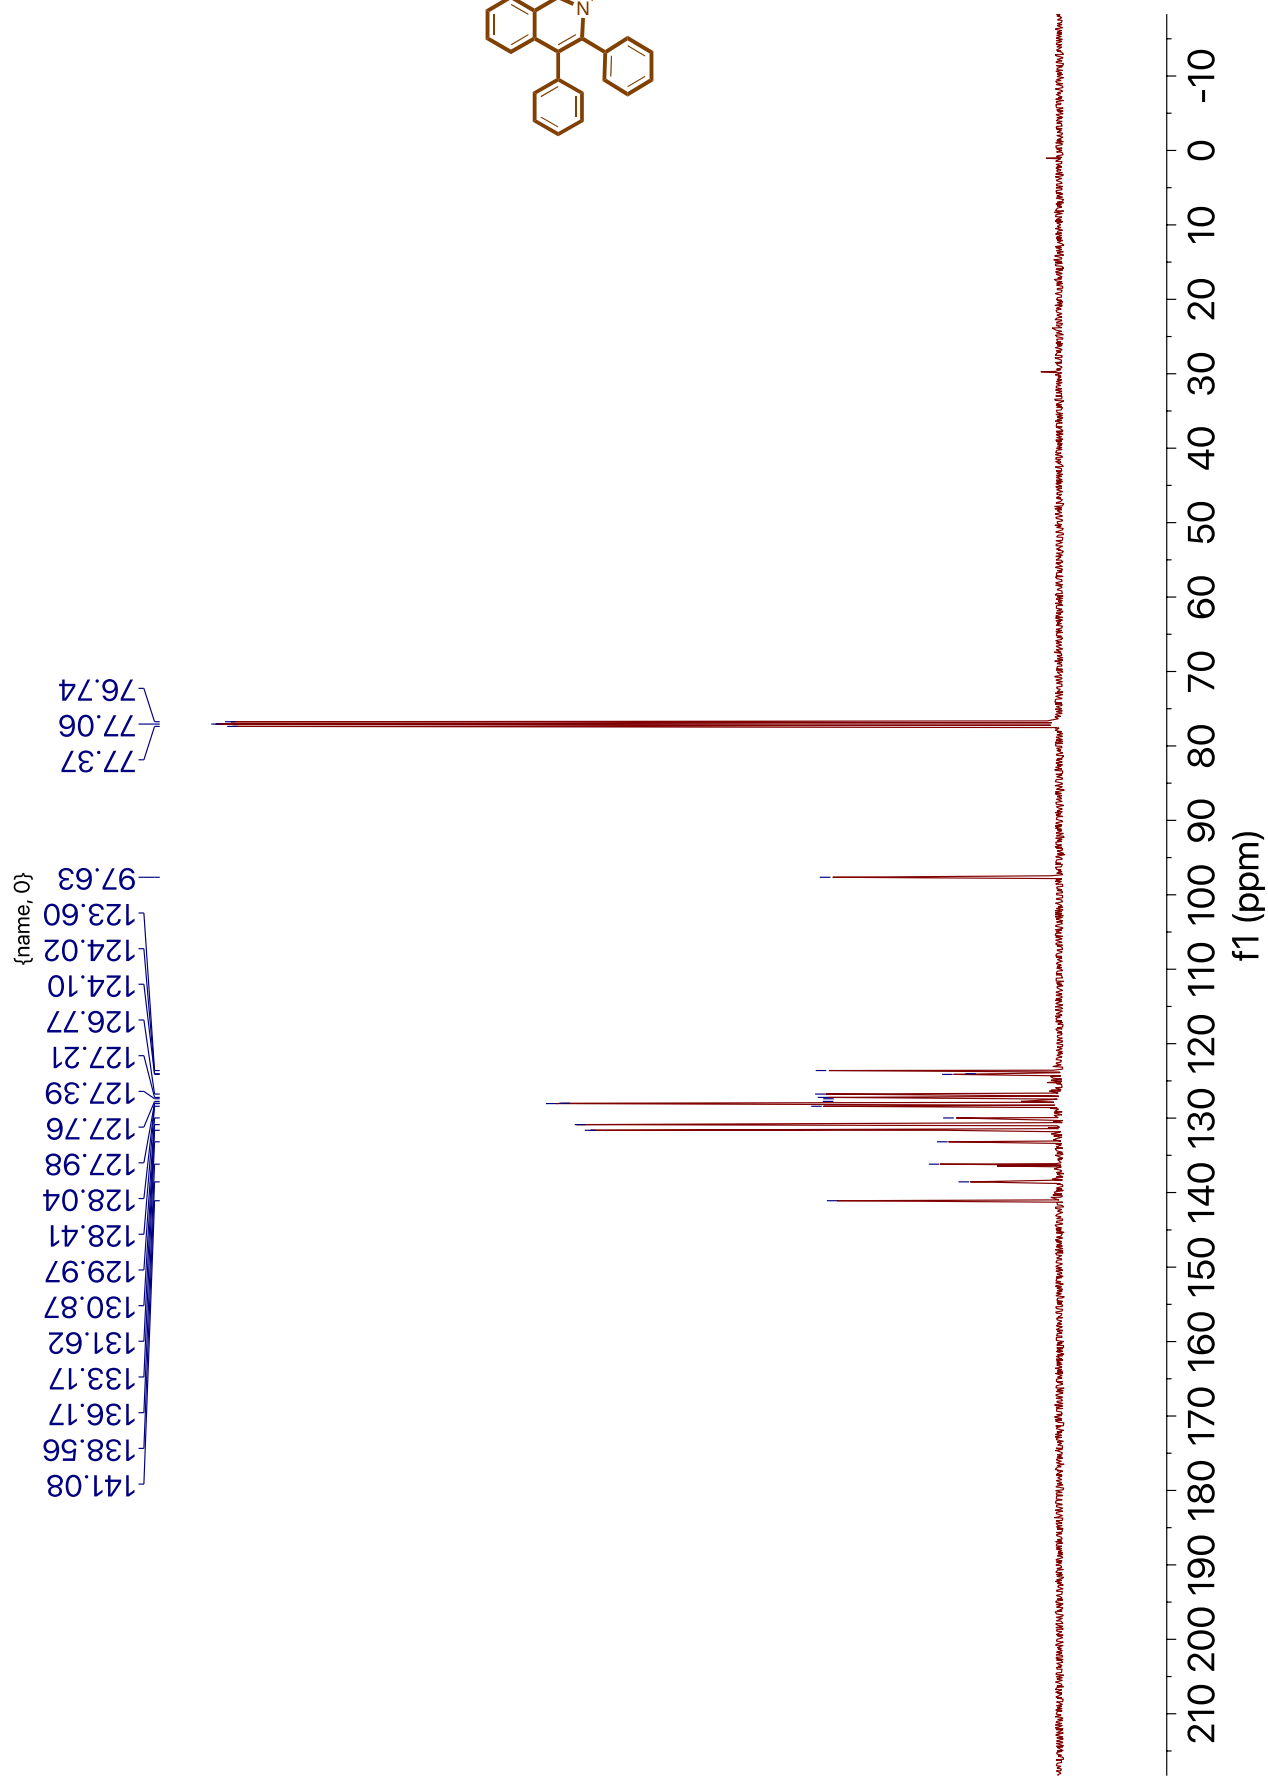

sk.201221.31.fid - PY-EL-8 - C13CPD CDCl3 /opt/nmrdata/current\_data.sk

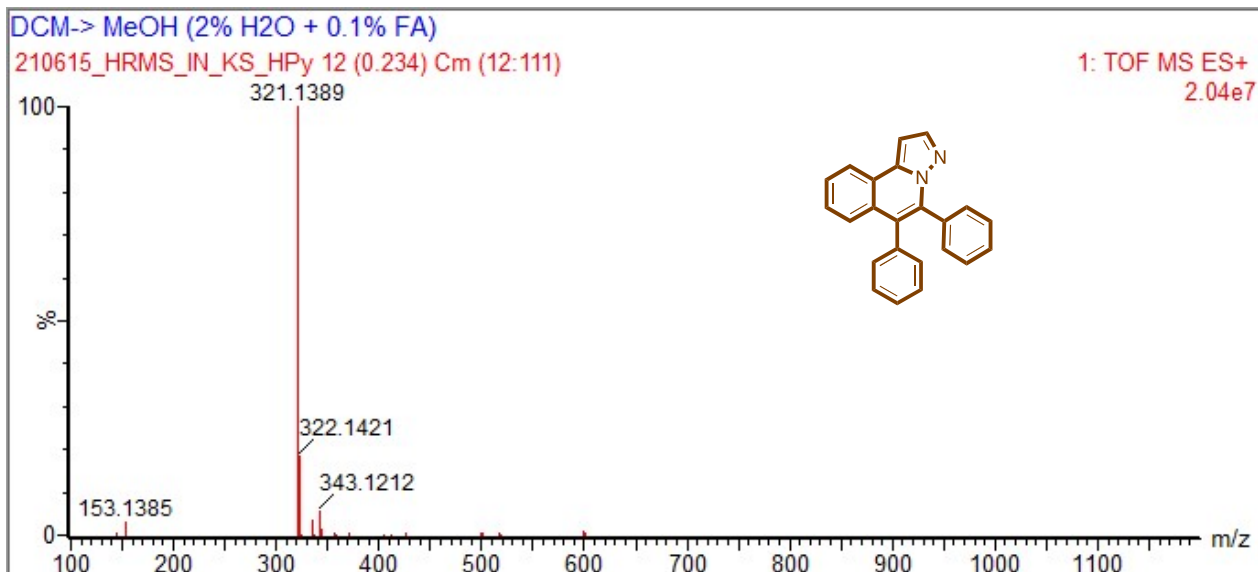

### Single Mass Analysis

Tolerance = 2.0 mDa / DBE: min = -1.5, max = 100.0

Element prediction: Off

Number of isotope peaks used for i-FIT = 3

Monoisotopic Mass, Even Electron Ions

200 formula(e) evaluated with 1 results within limits (all results (up to 1000) for each mass)

Elements Used:

C: 0-50      H: 0-100      N: 0-5      O: 0-3      Na: 0-1

| Mass     | Calc. Mass | mDa  | PPM  | DBE  | Formula    | i-FIT | i-FIT Norm | Fit Conf % | C  | H  | N | O | Na |
|----------|------------|------|------|------|------------|-------|------------|------------|----|----|---|---|----|
| 321.1389 | 321.1392   | -0.3 | -0.9 | 16.5 | C23 H17 N2 | 39.1  | n/a        | n/a        | 23 | 17 | 2 |   |    |

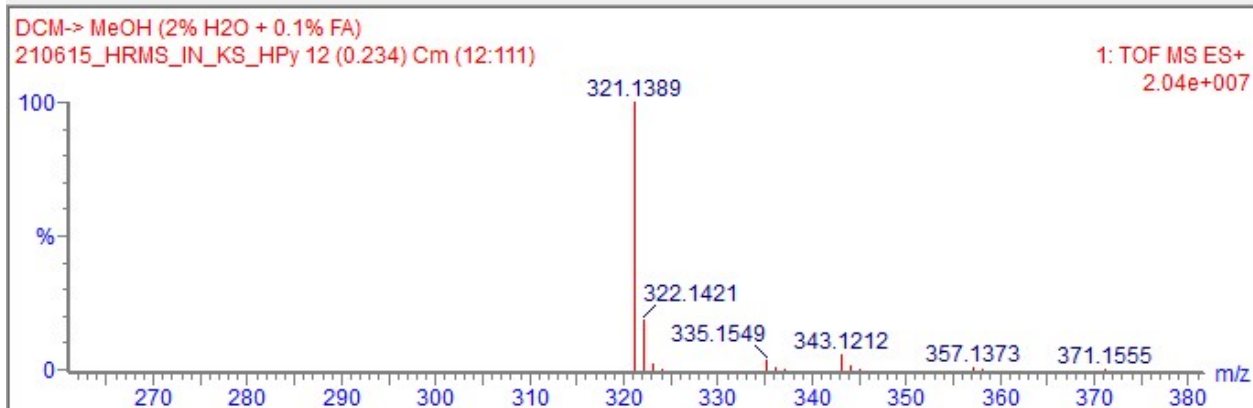

HRMS spectra of **3a**

Compound 3b, <sup>1</sup>H NMR, CDCl<sub>3</sub>, 400 MHz

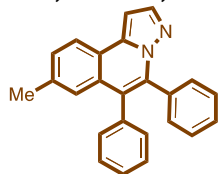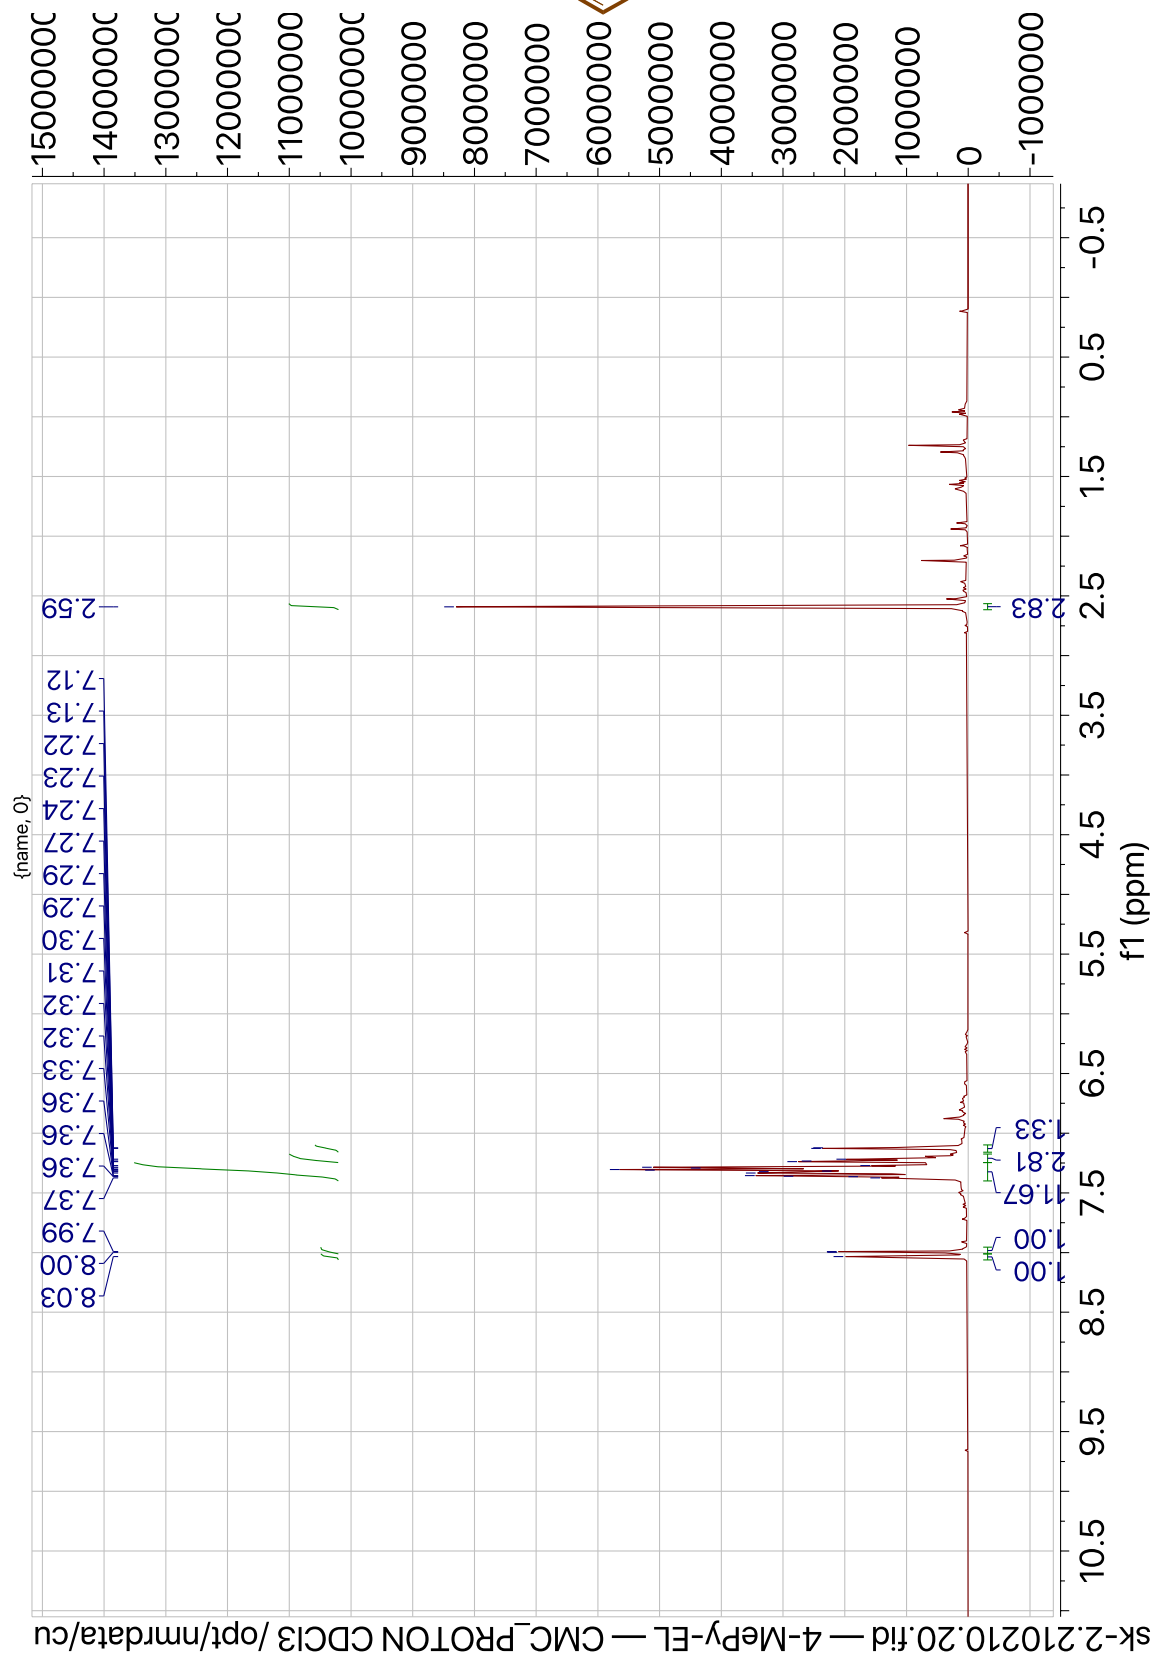

Compound 3b, <sup>13</sup>C NMR, CDCl<sub>3</sub>, 101 MHz

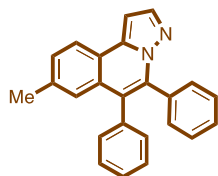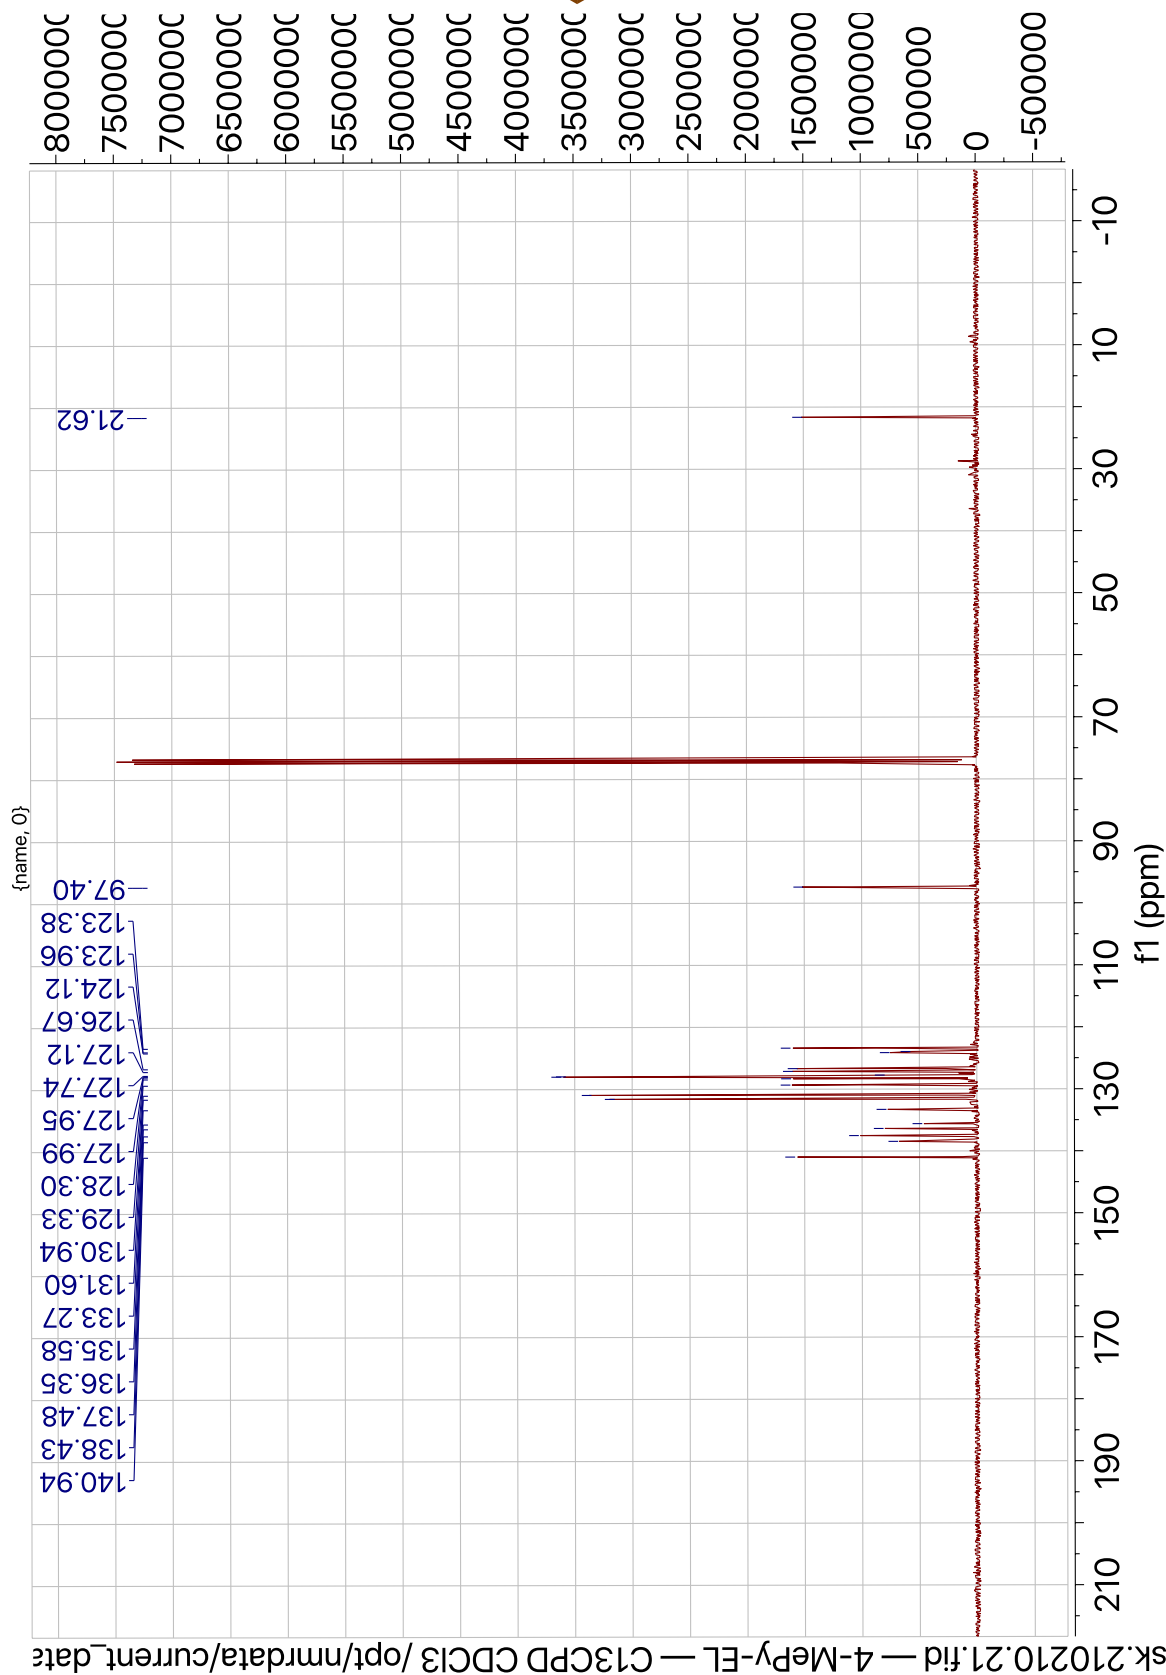

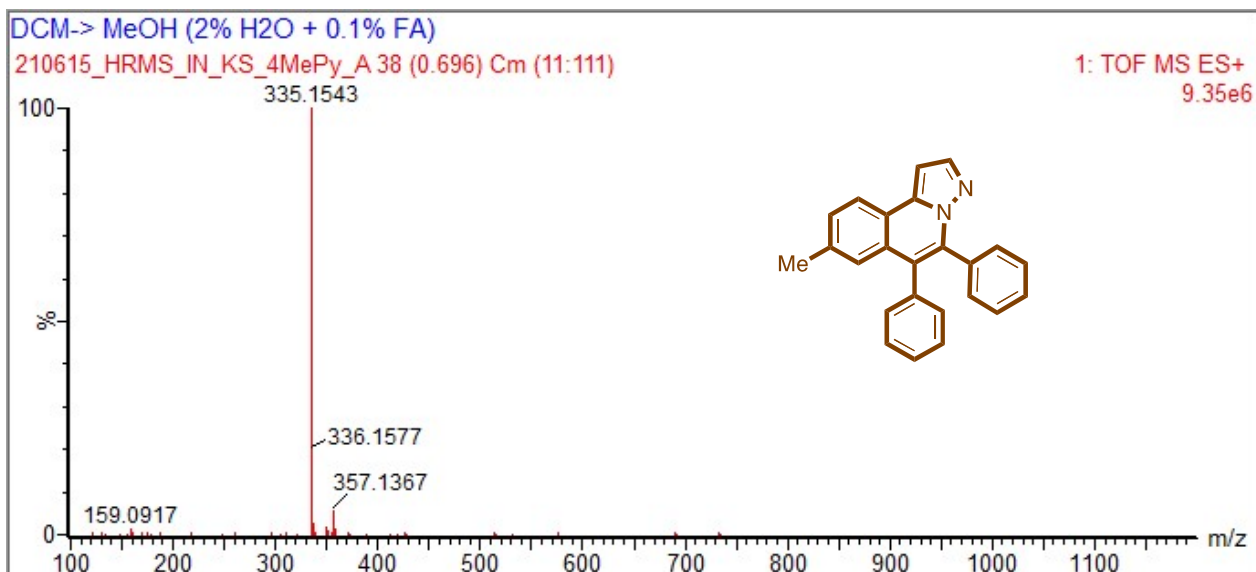

### Single Mass Analysis

Tolerance = 2.0 mDa / DBE: min = -1.5, max = 100.0

Element prediction: Off

Number of isotope peaks used for i-FIT = 3

Monoisotopic Mass, Even Electron Ions

208 formula(e) evaluated with 2 results within limits (all results (up to 1000) for each mass)

Elements Used:

C: 0-50      H: 0-100      N: 0-5      O: 0-3      Na: 0-1

| Mass     | Calc. Mass | mDa  | PPM  | DBE  | Formula                                           | i... | Fit Conf % | C  | H  | N | O | Na |
|----------|------------|------|------|------|---------------------------------------------------|------|------------|----|----|---|---|----|
| 335.1543 | 335.1548   | -0.5 | -1.5 | 16.5 | C <sub>24</sub> H <sub>19</sub> N <sub>2</sub>    | 3... | 32.42      | 24 | 19 | 2 |   |    |
|          | 335.1524   | 1.9  | 5.7  | 13.5 | C <sub>22</sub> H <sub>20</sub> N <sub>2</sub> Na | B... | 67.58      | 22 | 20 | 2 |   | 1  |

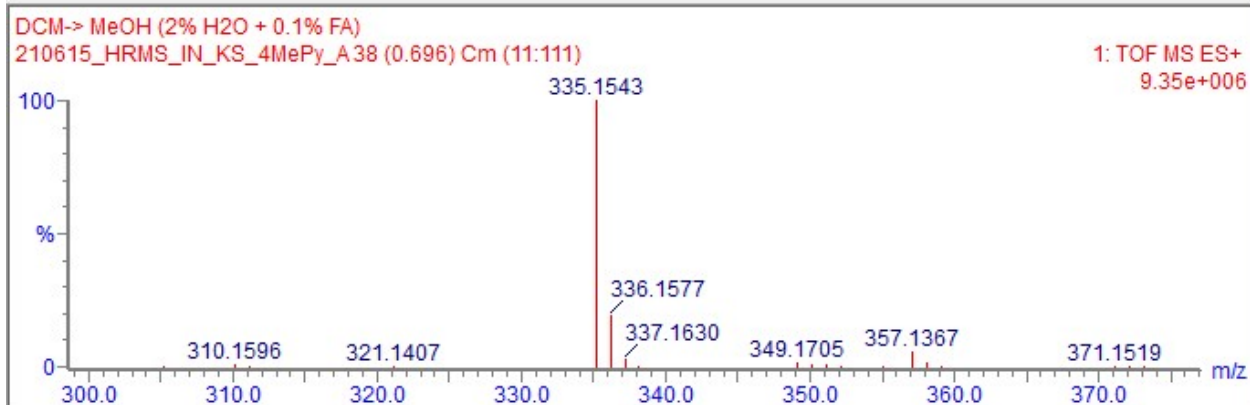

HRMS spectra of **3b**

Compound 3c, <sup>1</sup>H NMR, CDCl<sub>3</sub>, 400 MHz

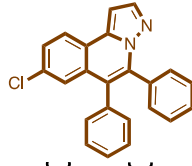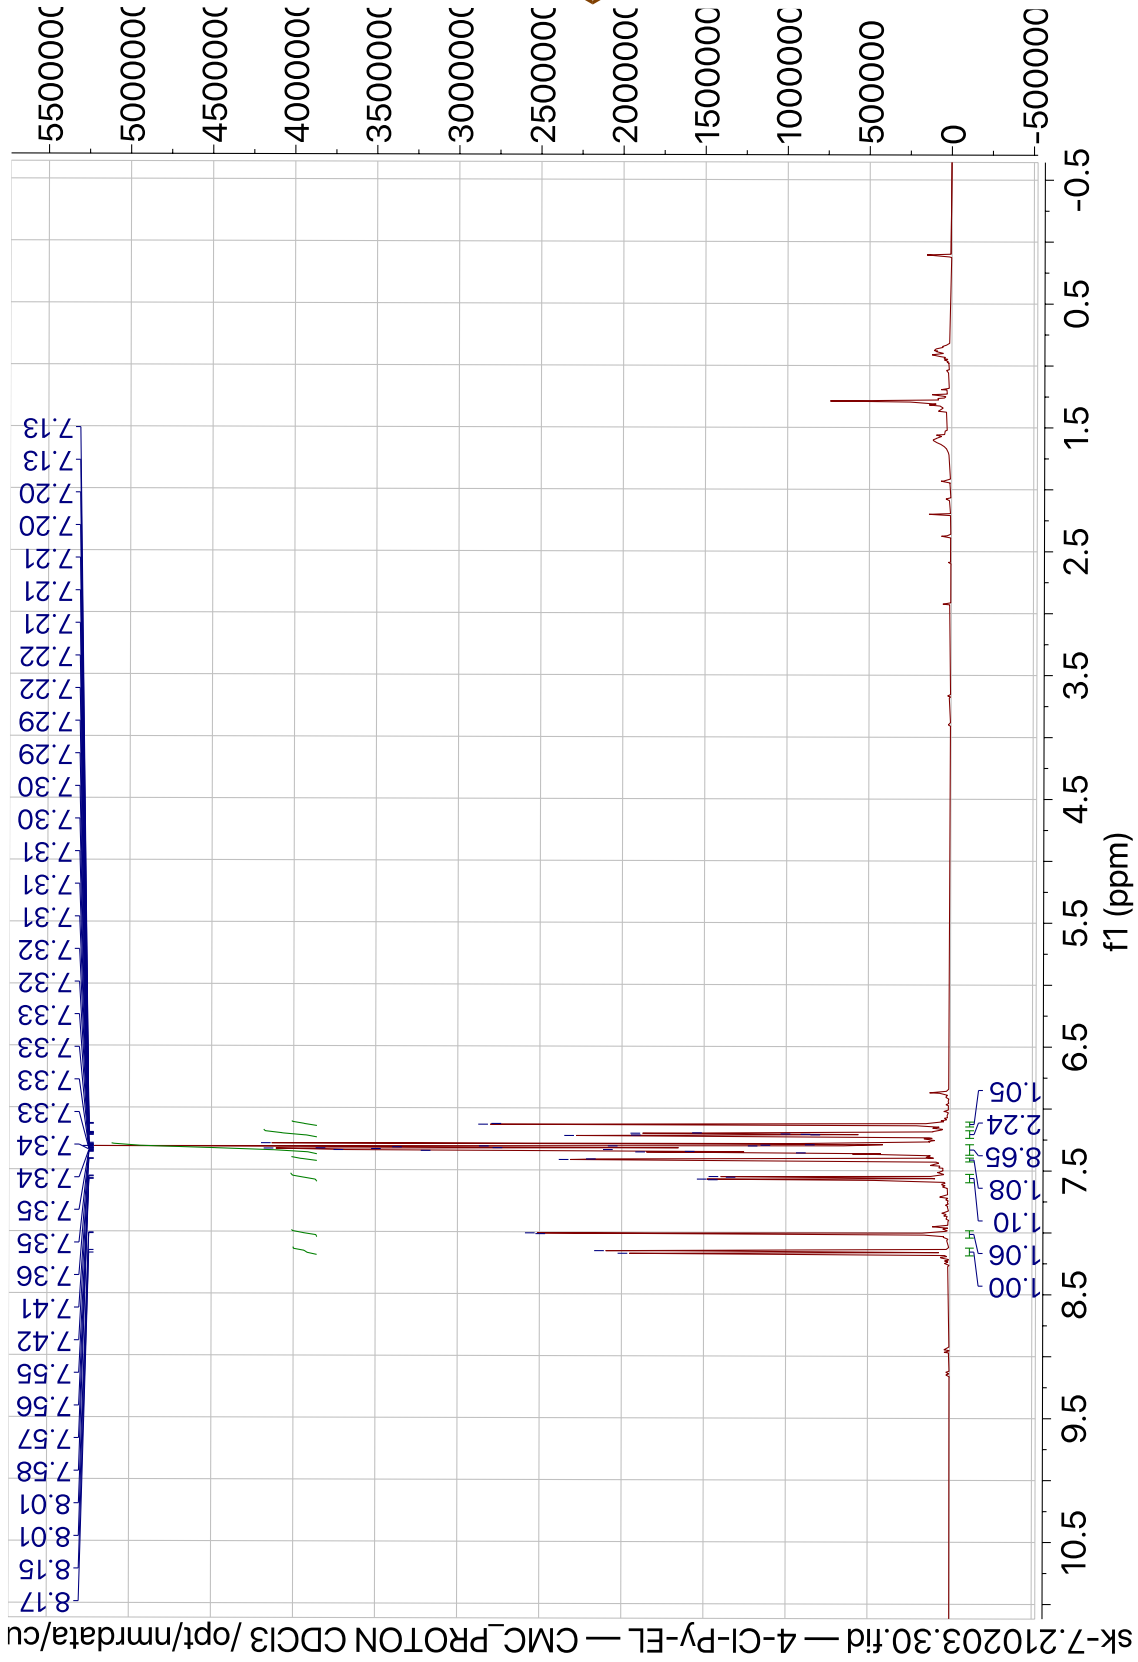

Compound 3c, <sup>13</sup>C NMR, CDCl<sub>3</sub>, 101 MHz

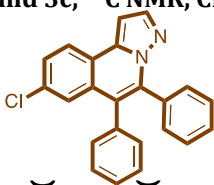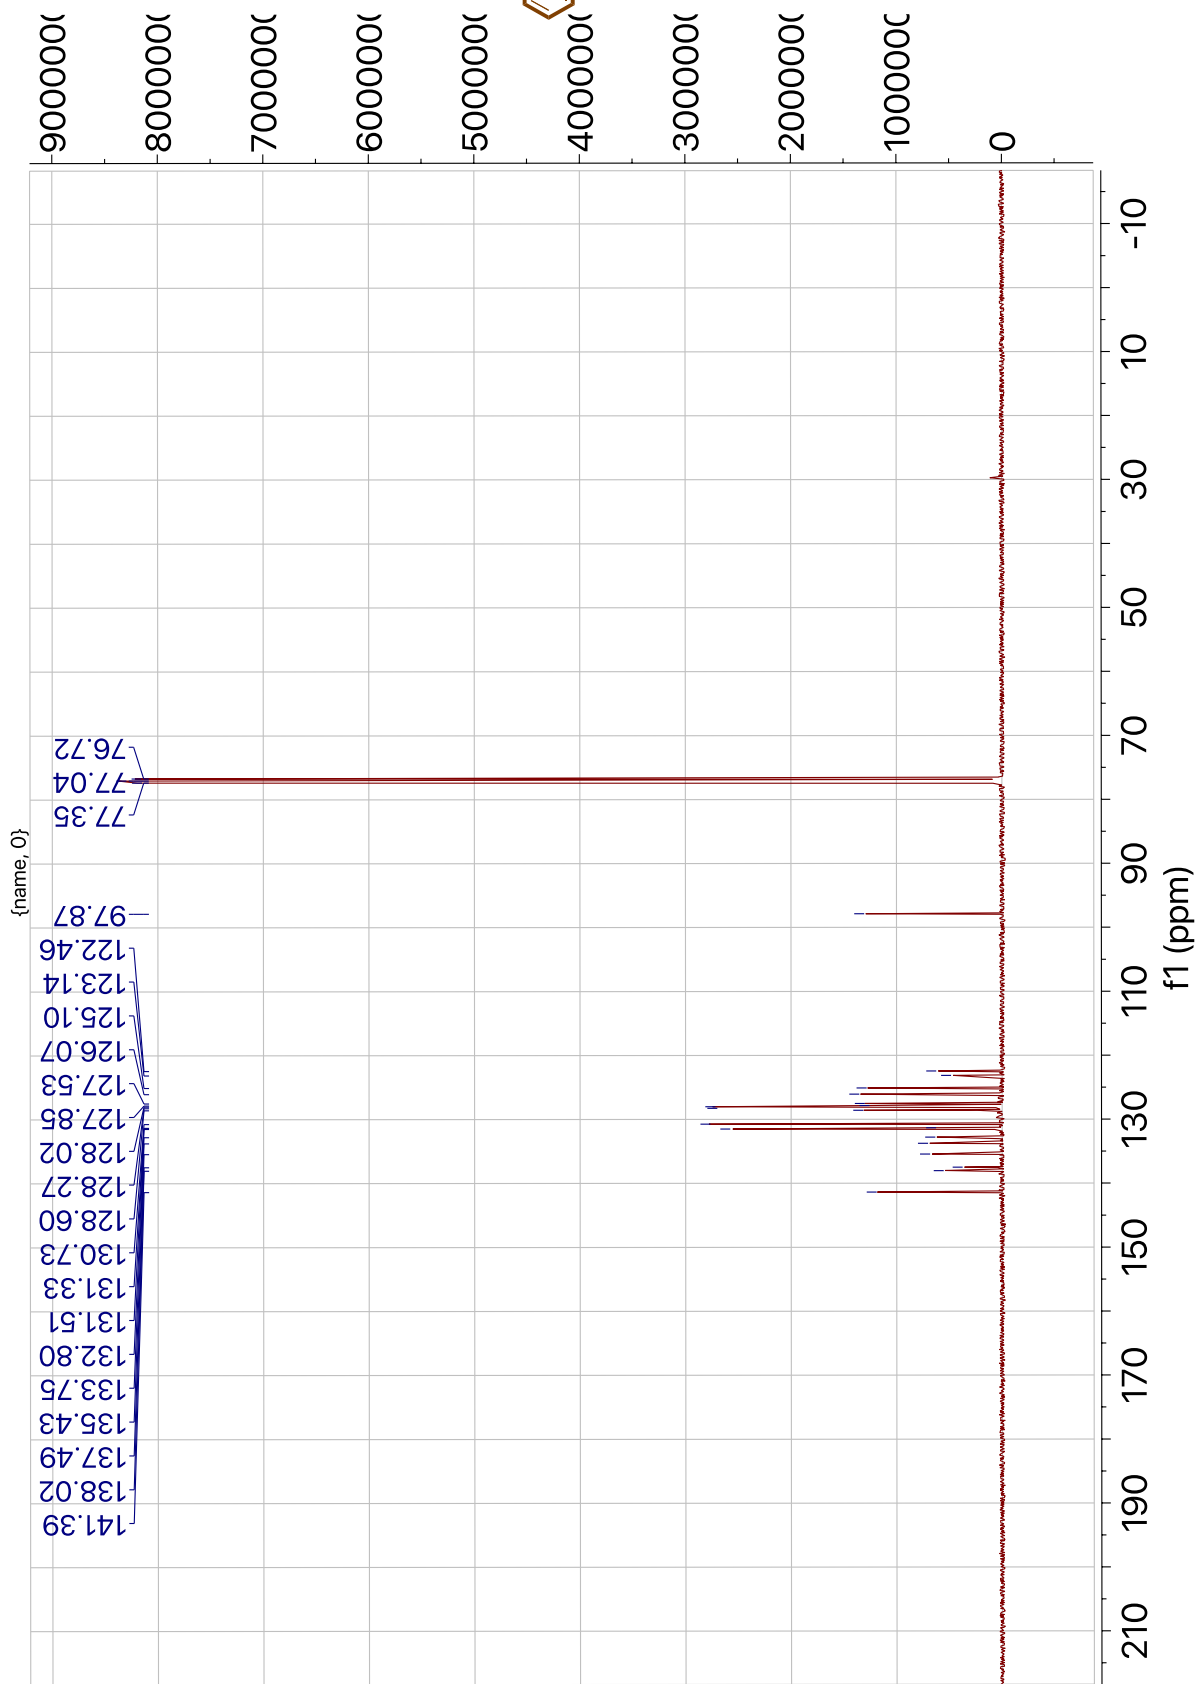

sk.210203.31.fid - 4-Cl-Py-EL - C13CPD CDCl3 /opt/nmrdata/current\_data



DCM-> MeOH (2% H2O + 0.1% FA)

210615\_HRMS\_IN\_KS\_4CIPy 1 (0.041) Cm (1:111)

1: TOF MS ES+  
2.84e7

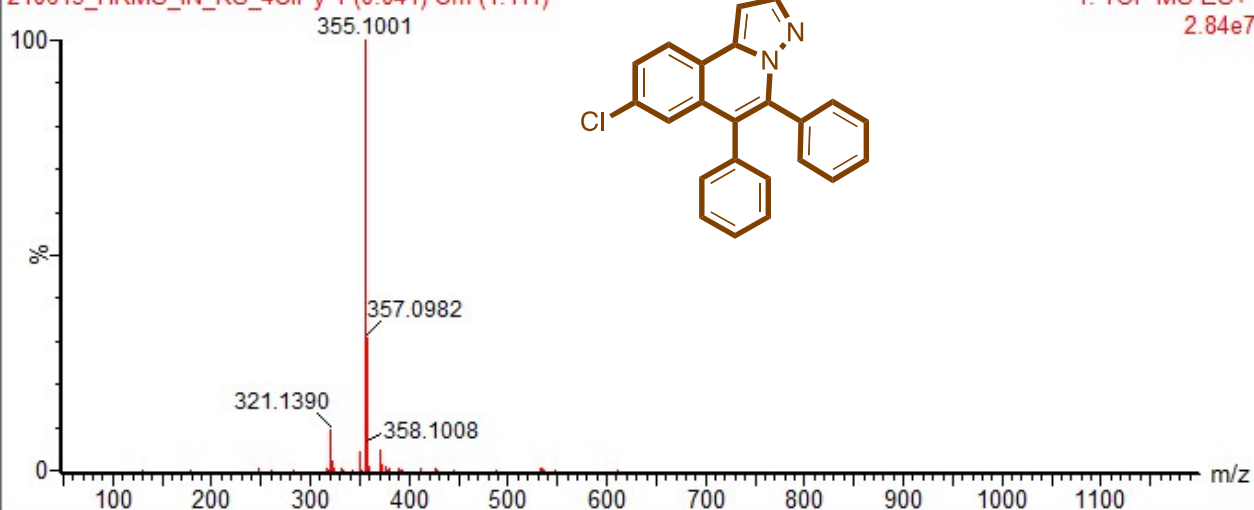

### Single Mass Analysis

Tolerance = 2.0 mDa / DBE: min = -1.5, max = 100.0

Element prediction: Off

Number of isotope peaks used for i-FIT = 3

Monoisotopic Mass, Even Electron Ions

413 formula(e) evaluated with 2 results within limits (all results (up to 1000) for each mass)

Elements Used:

C: 0-50      H: 0-100      N: 0-5      O: 0-3      Na: 0-1      Cl: 0-1

| Mass     | Calc. Mass | mDa  | PPM  | DBE  | Formula       | i-...  | Fit Conf % | C  | H  | N | O | Na | Cl |
|----------|------------|------|------|------|---------------|--------|------------|----|----|---|---|----|----|
| 355.1001 | 355.1002   | -0.1 | -0.3 | 16.5 | C23 H16 N2 Cl | 6.0... | 100.00     | 23 | 16 | 2 |   |    | 1  |
|          | 355.0984   | 1.7  | 4.8  | 21.5 | C24 H11 N4    | 7.1... | 0.00       | 24 | 11 | 4 |   |    |    |

DCM-> MeOH (2% H2O + 0.1% FA)

210615\_HRMS\_IN\_KS\_4CIPy 1 (0.041) Cm (1:111)

1: TOF MS ES+  
2.84e+007

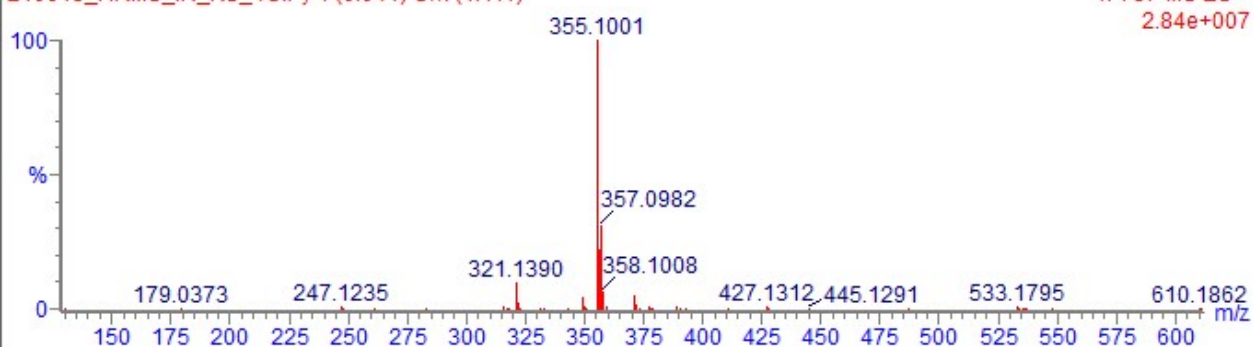

HRMS spectra of **3c**

Compound 3d, <sup>1</sup>H NMR, CDCl<sub>3</sub>, 400 MHz

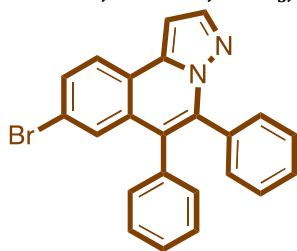

{name, 0}

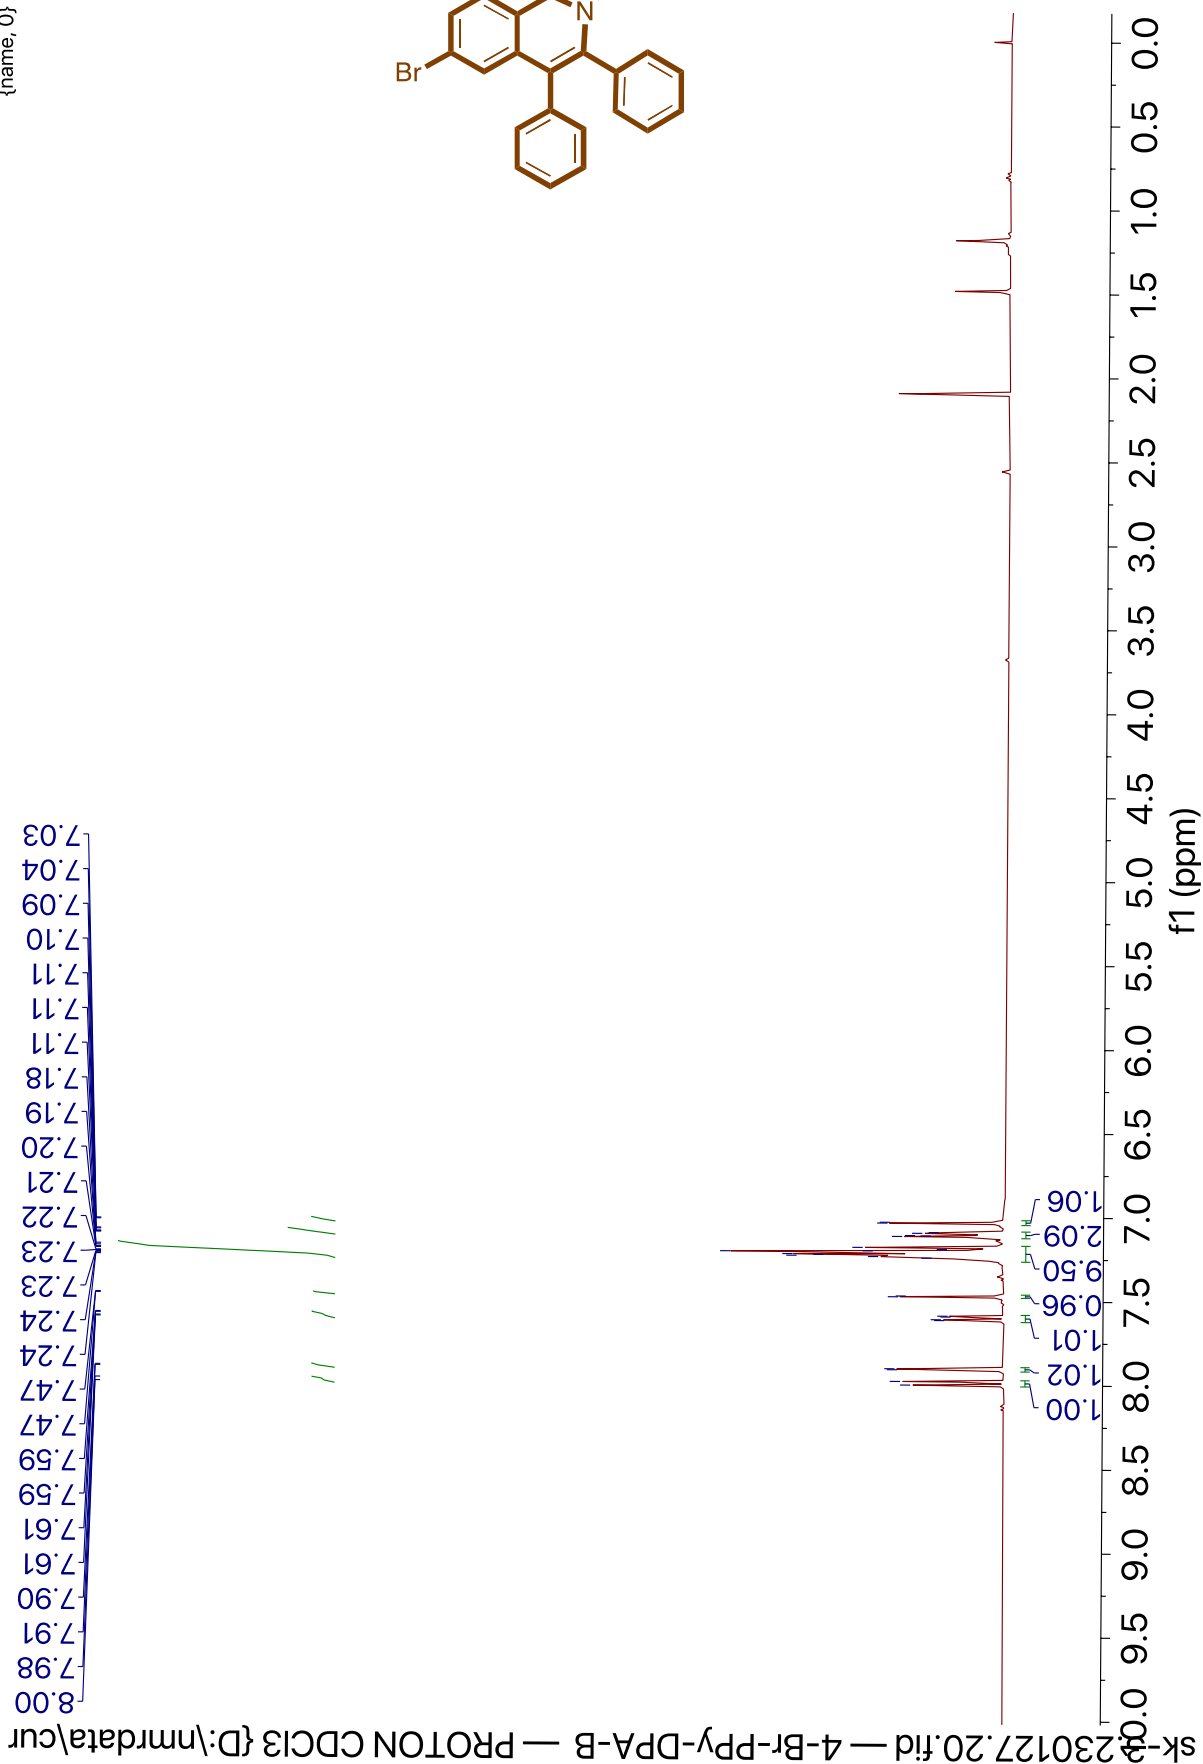

sk-4.230127.21.fid - 4-Br-Py-DPA-B - C13CPD CDCl3 {D:\nmrdata\curr

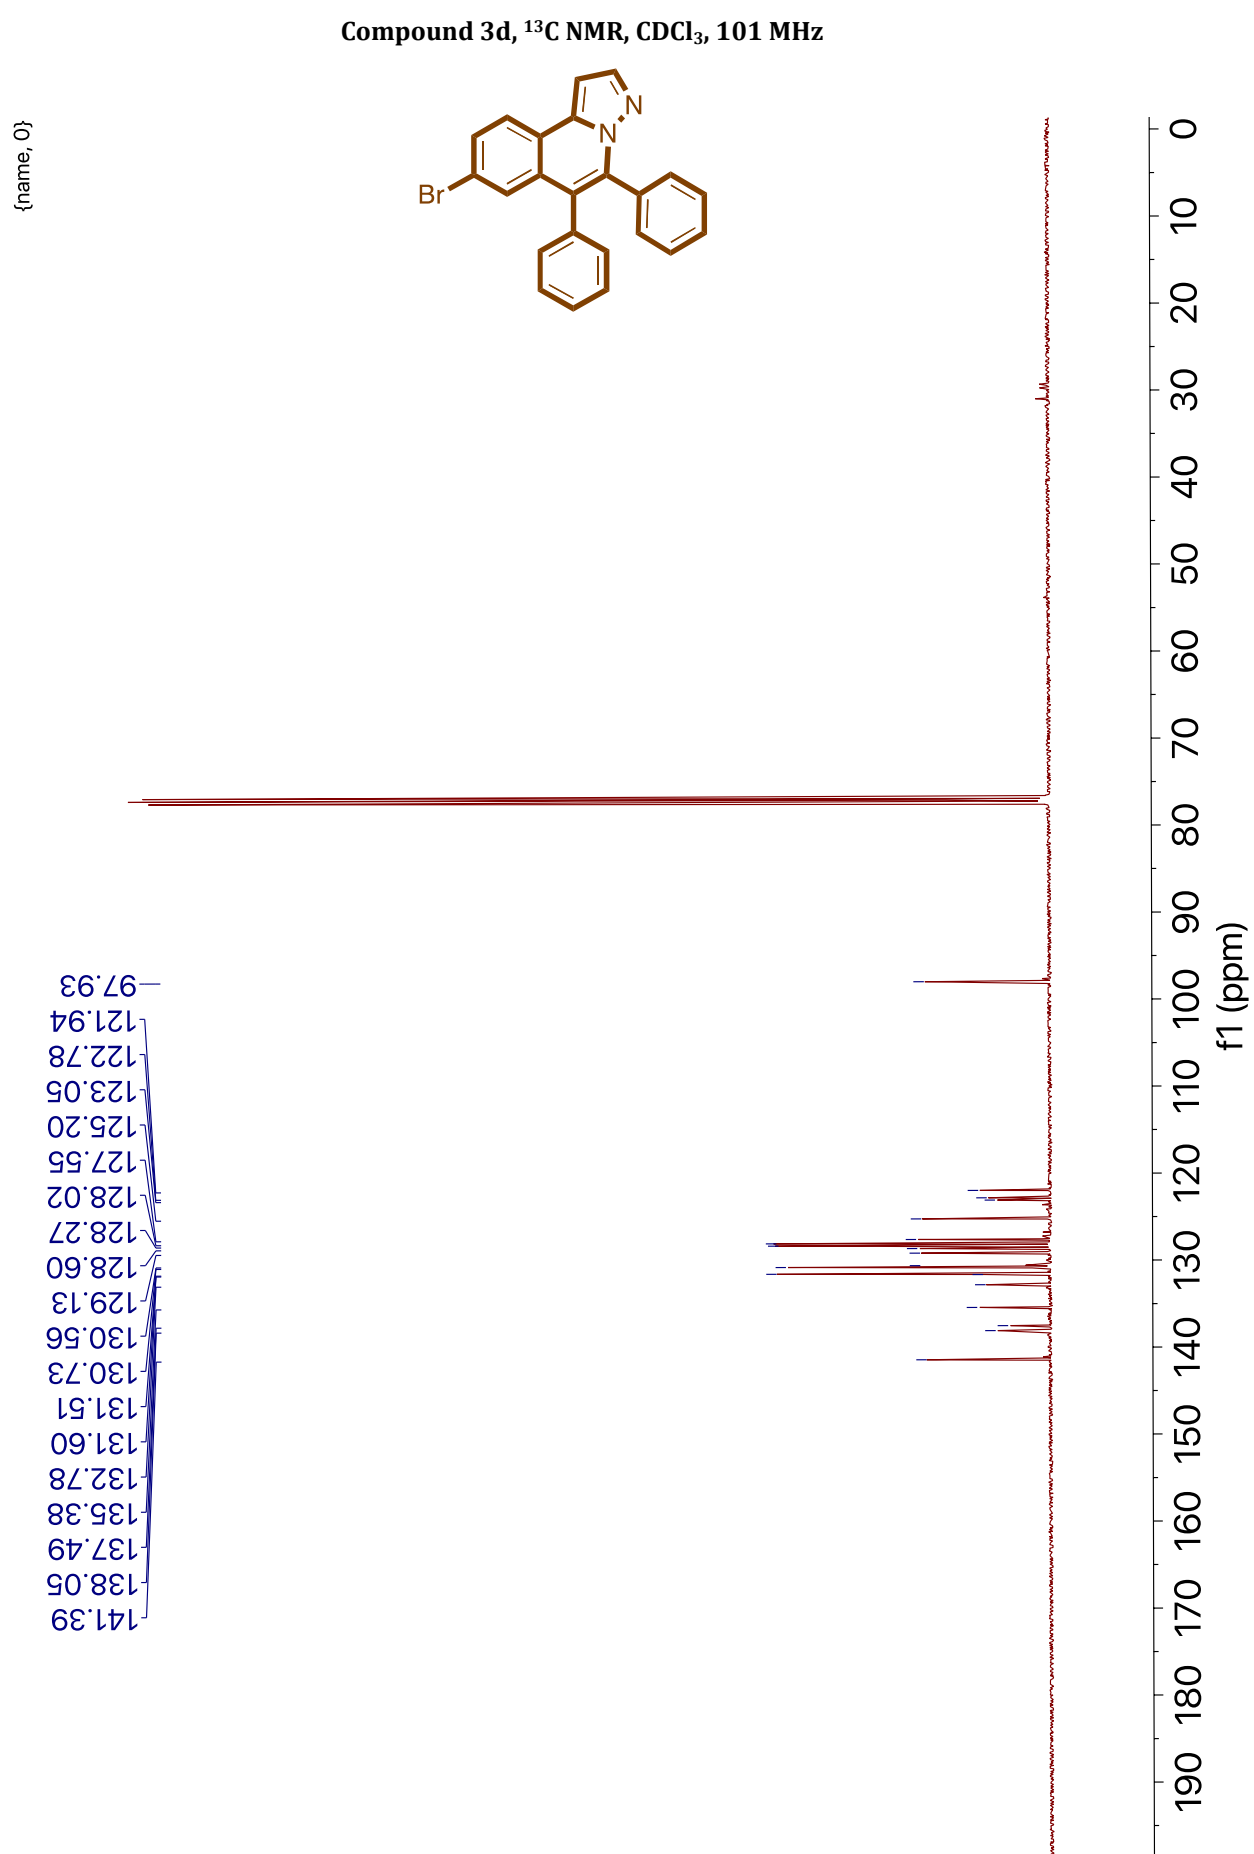

{name, 0}

DCM-> MeOH (2% H2O + 0.1% FA)

210615\_HRMS\_IN\_KS\_4BrPy 73 (1.324) Cm (9:111)

1: TOF MS ES+  
1.74e7

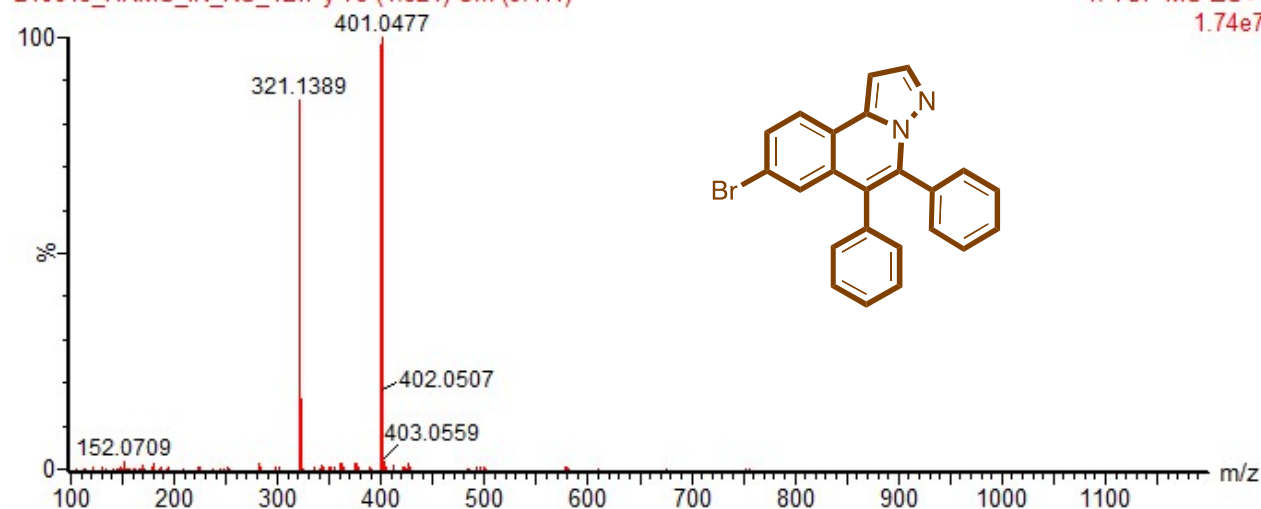

### Single Mass Analysis

Tolerance = 2.0 mDa / DBE: min = -1.5, max = 100.0

Element prediction: Off

Number of isotope peaks used for i-FIT = 3

Monoisotopic Mass, Even Electron Ions

439 formula(e) evaluated with 2 results within limits (all results (up to 1000) for each mass)

Elements Used:

C: 0-50

H: 0-100

N: 0-5

O: 0-3

Na: 0-1

Br: 0-1

| Mass     | Calc. Mass | mDa  | PPM  | DBE  | Formula         | i-Fl... | Fit Conf % | C  | H  | N | O | Na | Br |
|----------|------------|------|------|------|-----------------|---------|------------|----|----|---|---|----|----|
| 399.0493 | 399.0494   | -0.1 | -0.3 | 20.5 | C22 H8 N4 O3 Na | 51...   | 0.00       | 22 | 8  | 4 | 3 | 1  |    |
|          | 399.0497   | -0.4 | -1.0 | 16.5 | C23 H16 N2 Br   |         | 100.00     | 23 | 16 | 2 |   |    | 1  |

DCM-> MeOH (2% H2O + 0.1% FA)

210615\_HRMS\_IN\_KS\_4BrPy 73 (1.324) Cm (9:111)

1: TOF MS ES+  
1.74e+007

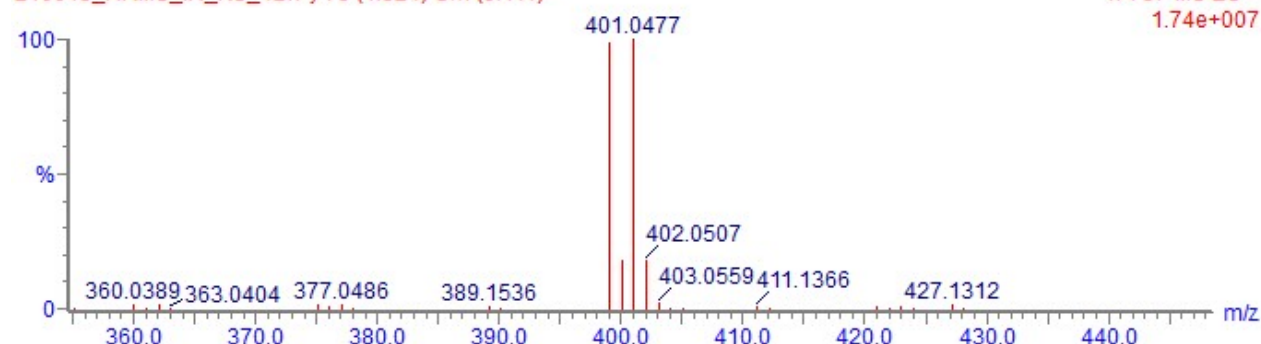

HRMS spectra of **3d**

sk-2230126\_30.fid — 4-F-PY-DPA-B — PROTON CDCl3 {D:\nmrdata\curr

{name, 0}

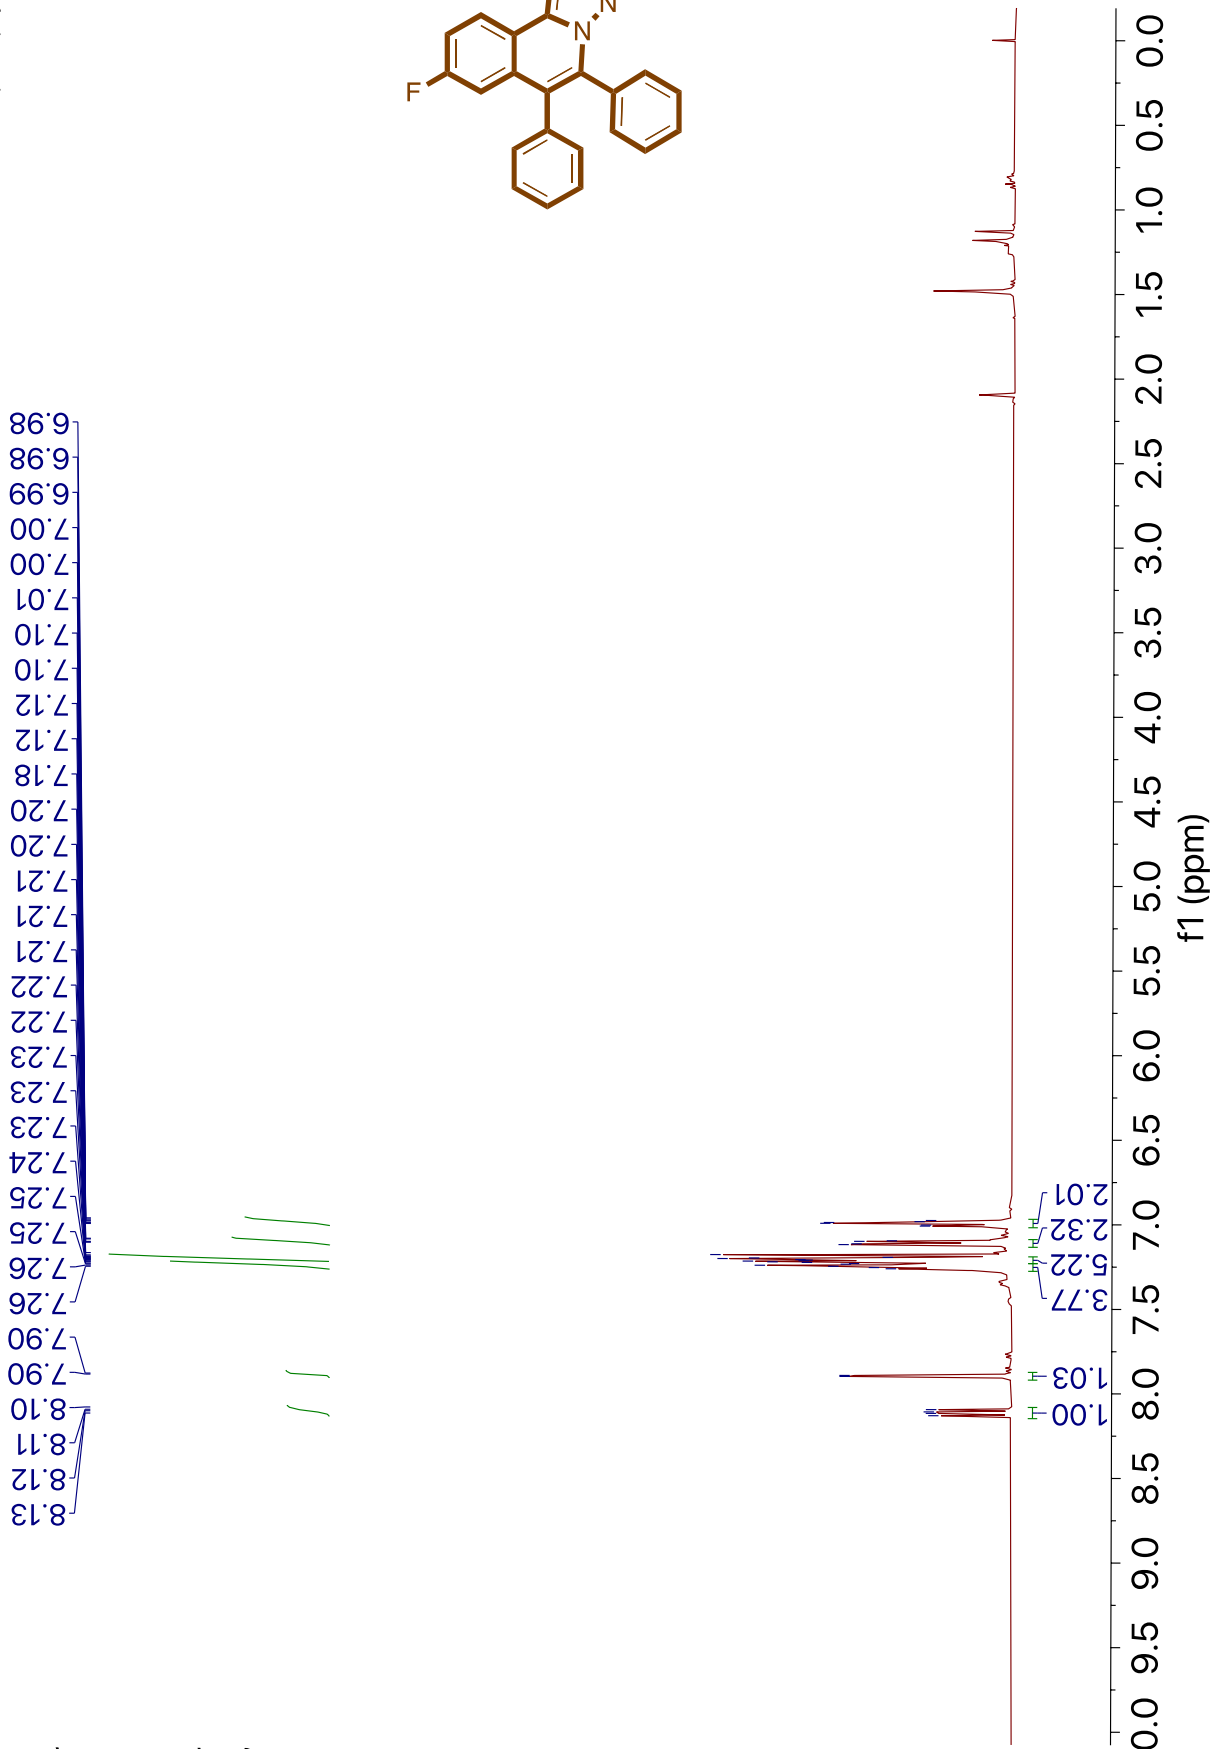

Compound 3e, <sup>13</sup>C NMR, CDCl<sub>3</sub>, 101 MHz

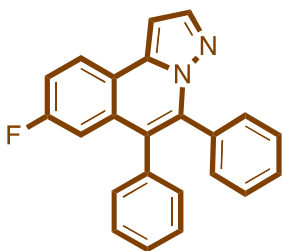

{name, 0}

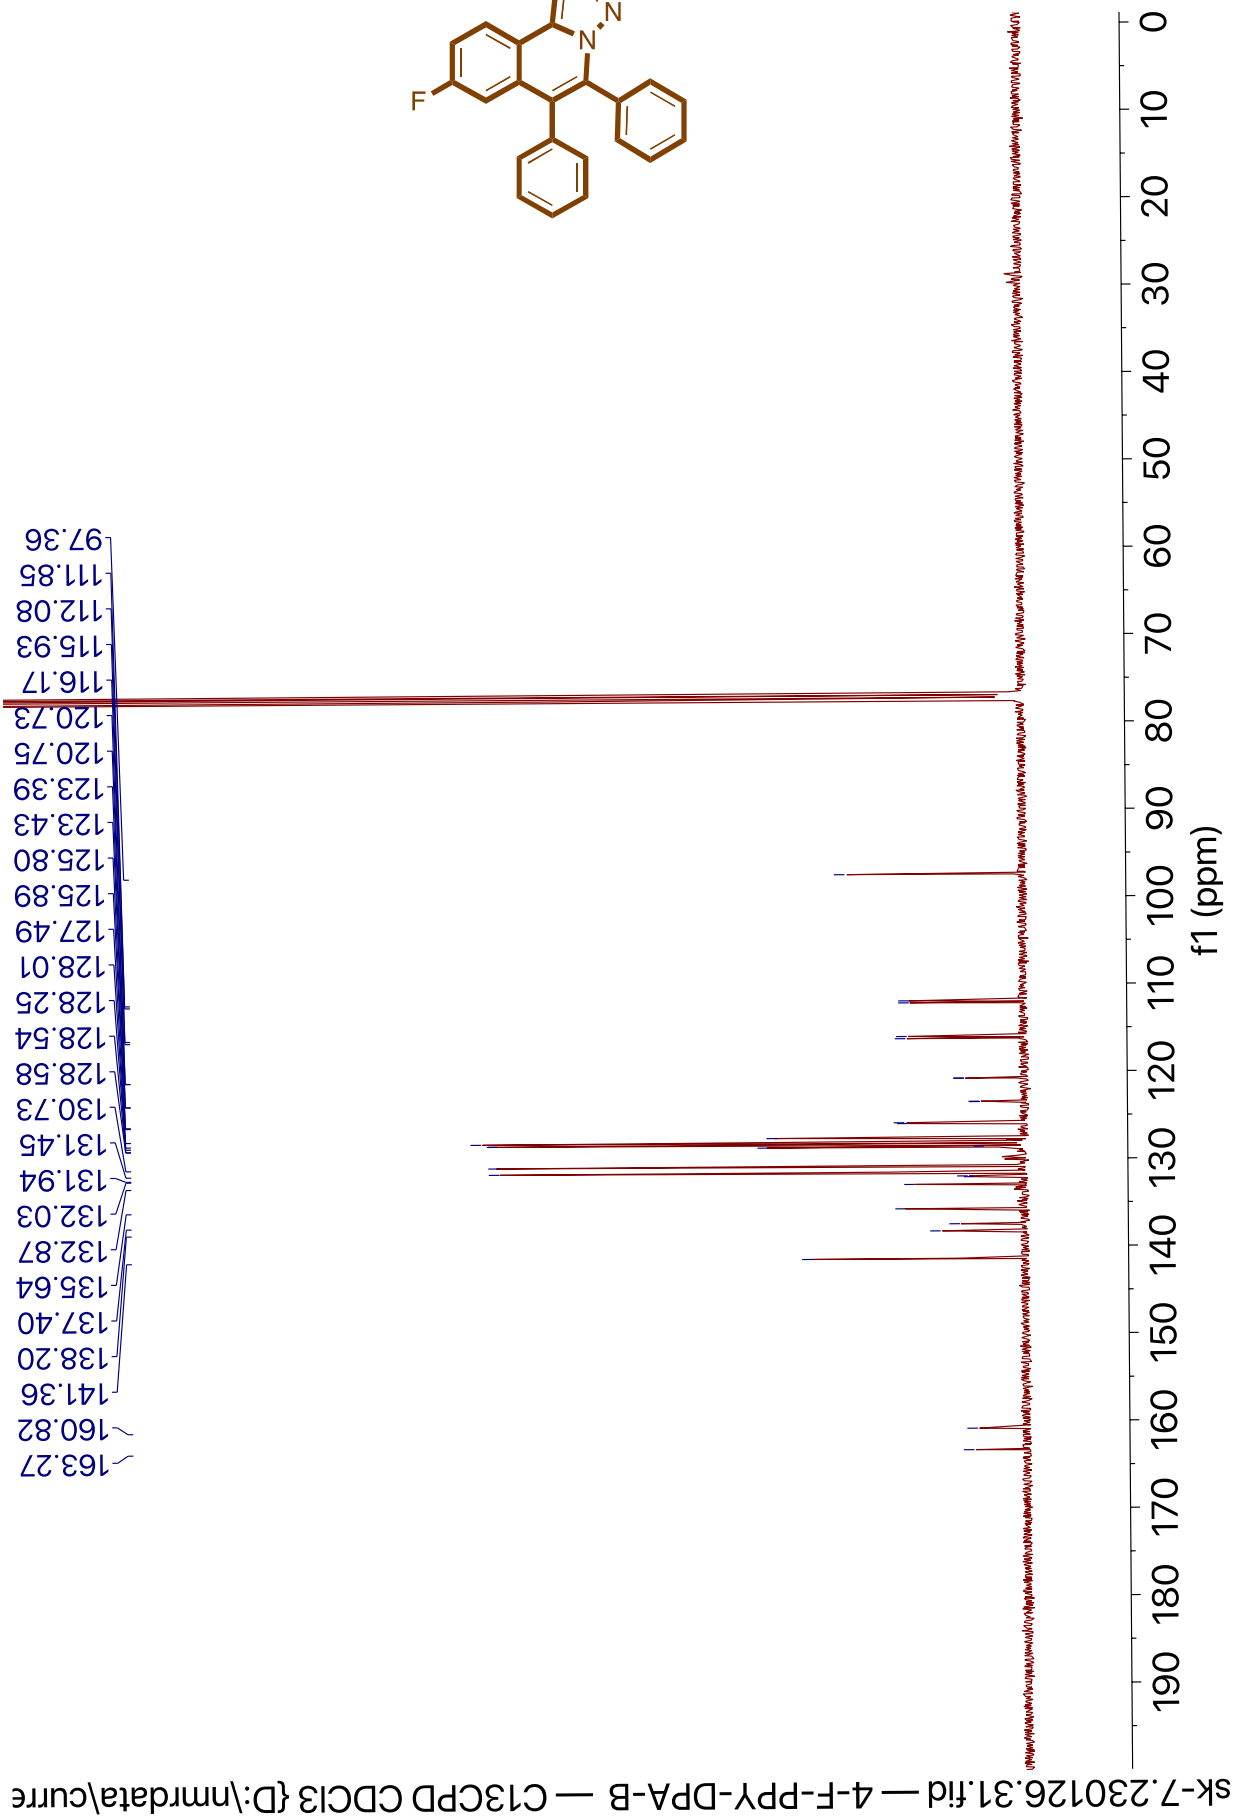

{name, 0}

Compound 3e, <sup>19</sup>F NMR, CDCl<sub>3</sub>, 375 MHz

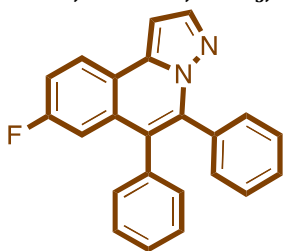

-111.43  
-111.45  
-111.45  
-111.46  
-111.47  
-111.47  
-111.47  
-111.48  
-111.49

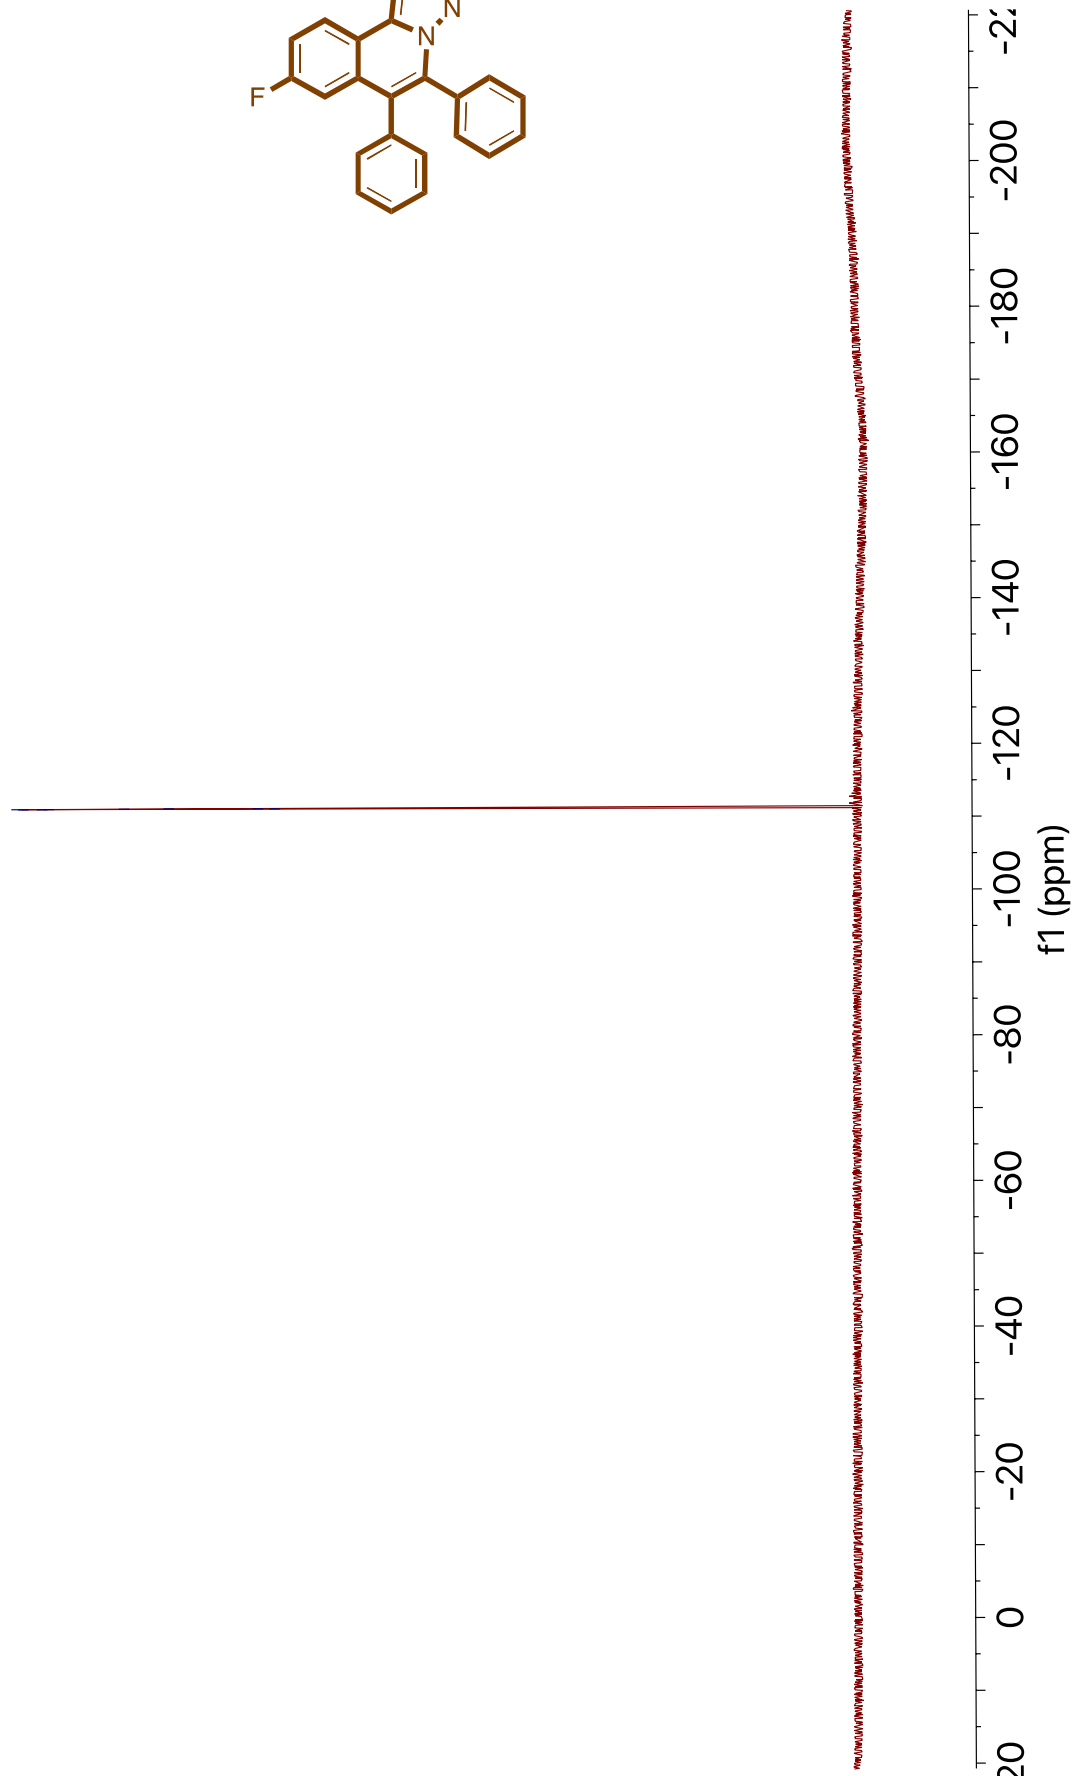

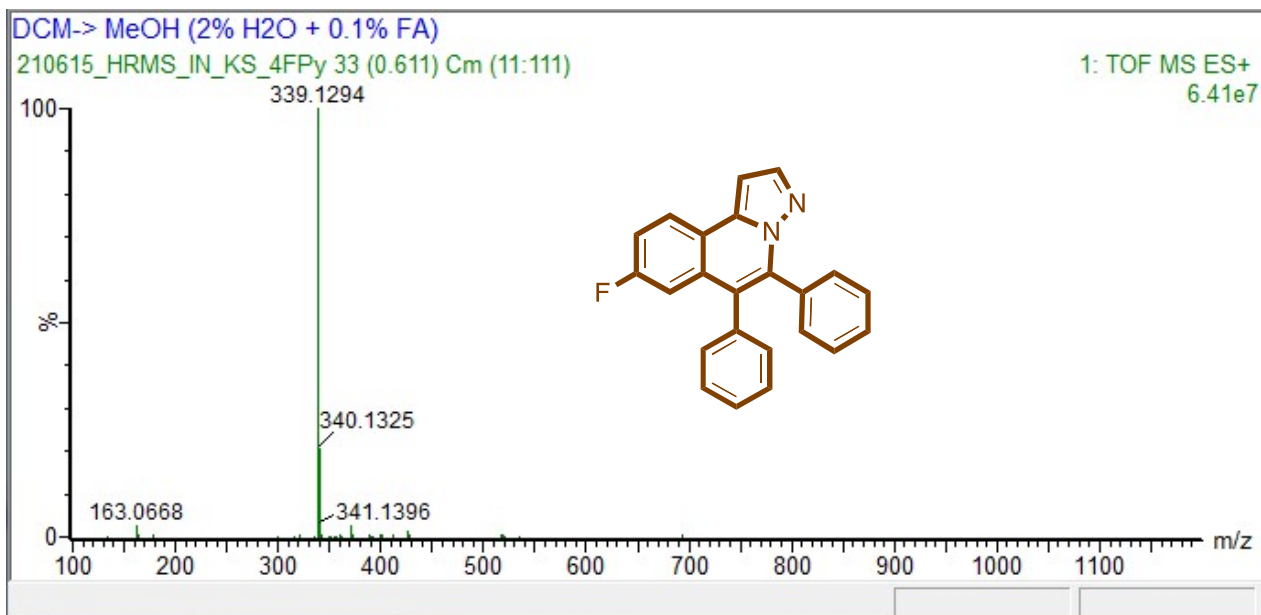

**Single Mass Analysis**  
 Tolerance = 2.0 mDa / DBE: min = -1.5, max = 100.0  
 Element prediction: Off  
 Number of isotope peaks used for i-FIT = 3  
 Monoisotopic Mass, Even Electron Ions  
 404 formula(e) evaluated with 1 results within limits (all results (up to 1000) for each mass)  
 Elements Used:  
 C: 0-50      H: 0-100      N: 0-5      O: 0-3      F: 0-1      Na: 0-1

| Mass     | Calc. Mass | mDa  | PPM  | DBE  | Formula      | i-FI... | Fit Conf % | C  | H  | N | O | F | Na |
|----------|------------|------|------|------|--------------|---------|------------|----|----|---|---|---|----|
| 339.1294 | 339.1298   | -0.4 | -1.2 | 16.5 | C23 H16 N2 F | n/a     | n/a        | 23 | 16 | 2 |   | 1 |    |

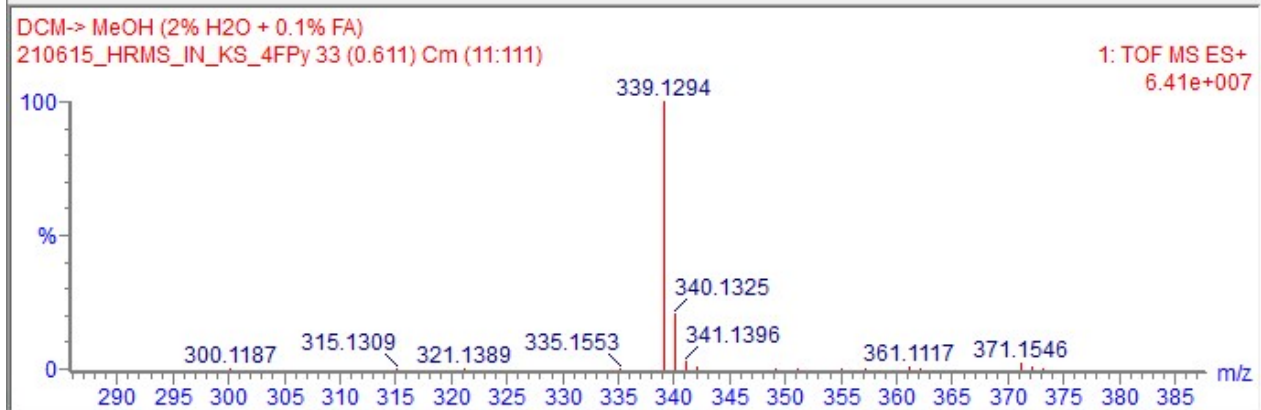

HRMS spectra of **3e**



Compound 3f, <sup>1</sup>H NMR, CDCl<sub>3</sub>, 400 MHz

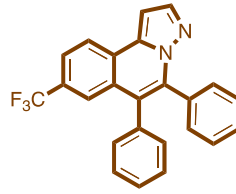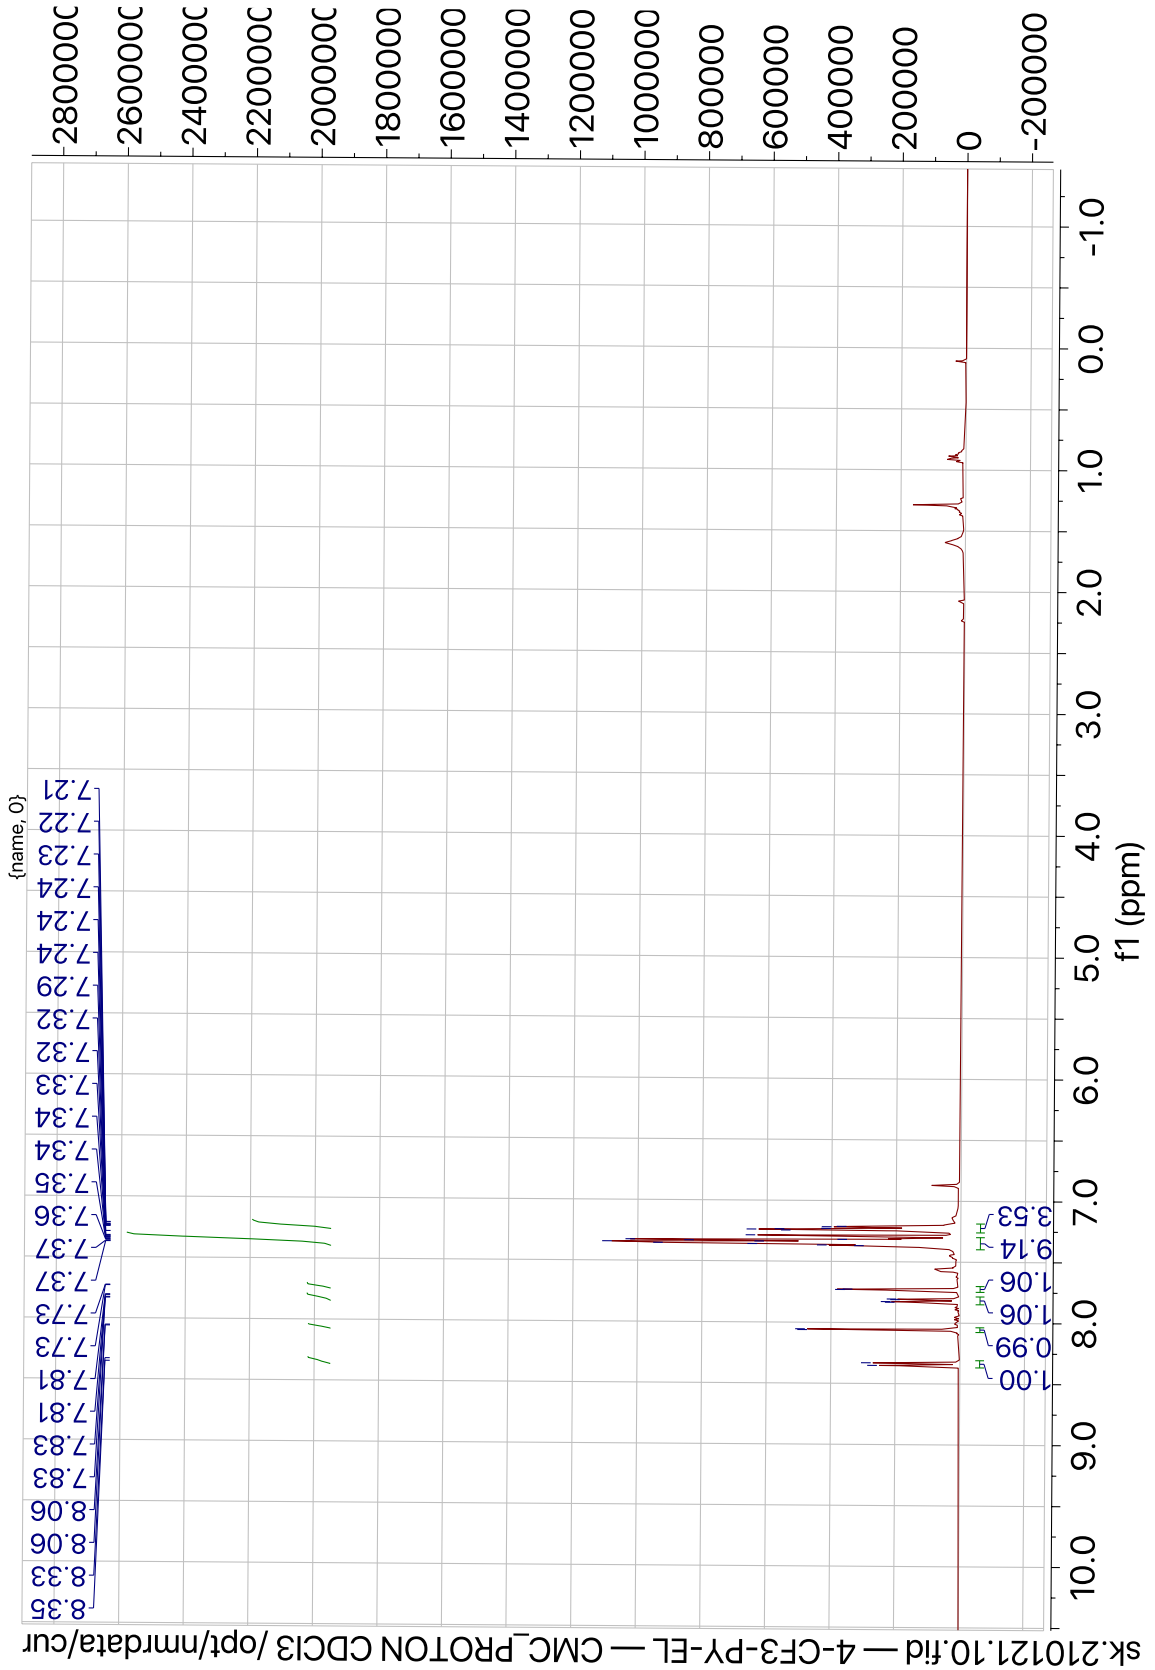

Compound 3f, <sup>13</sup>C NMR, CDCl<sub>3</sub>, 101 MHz

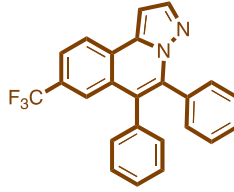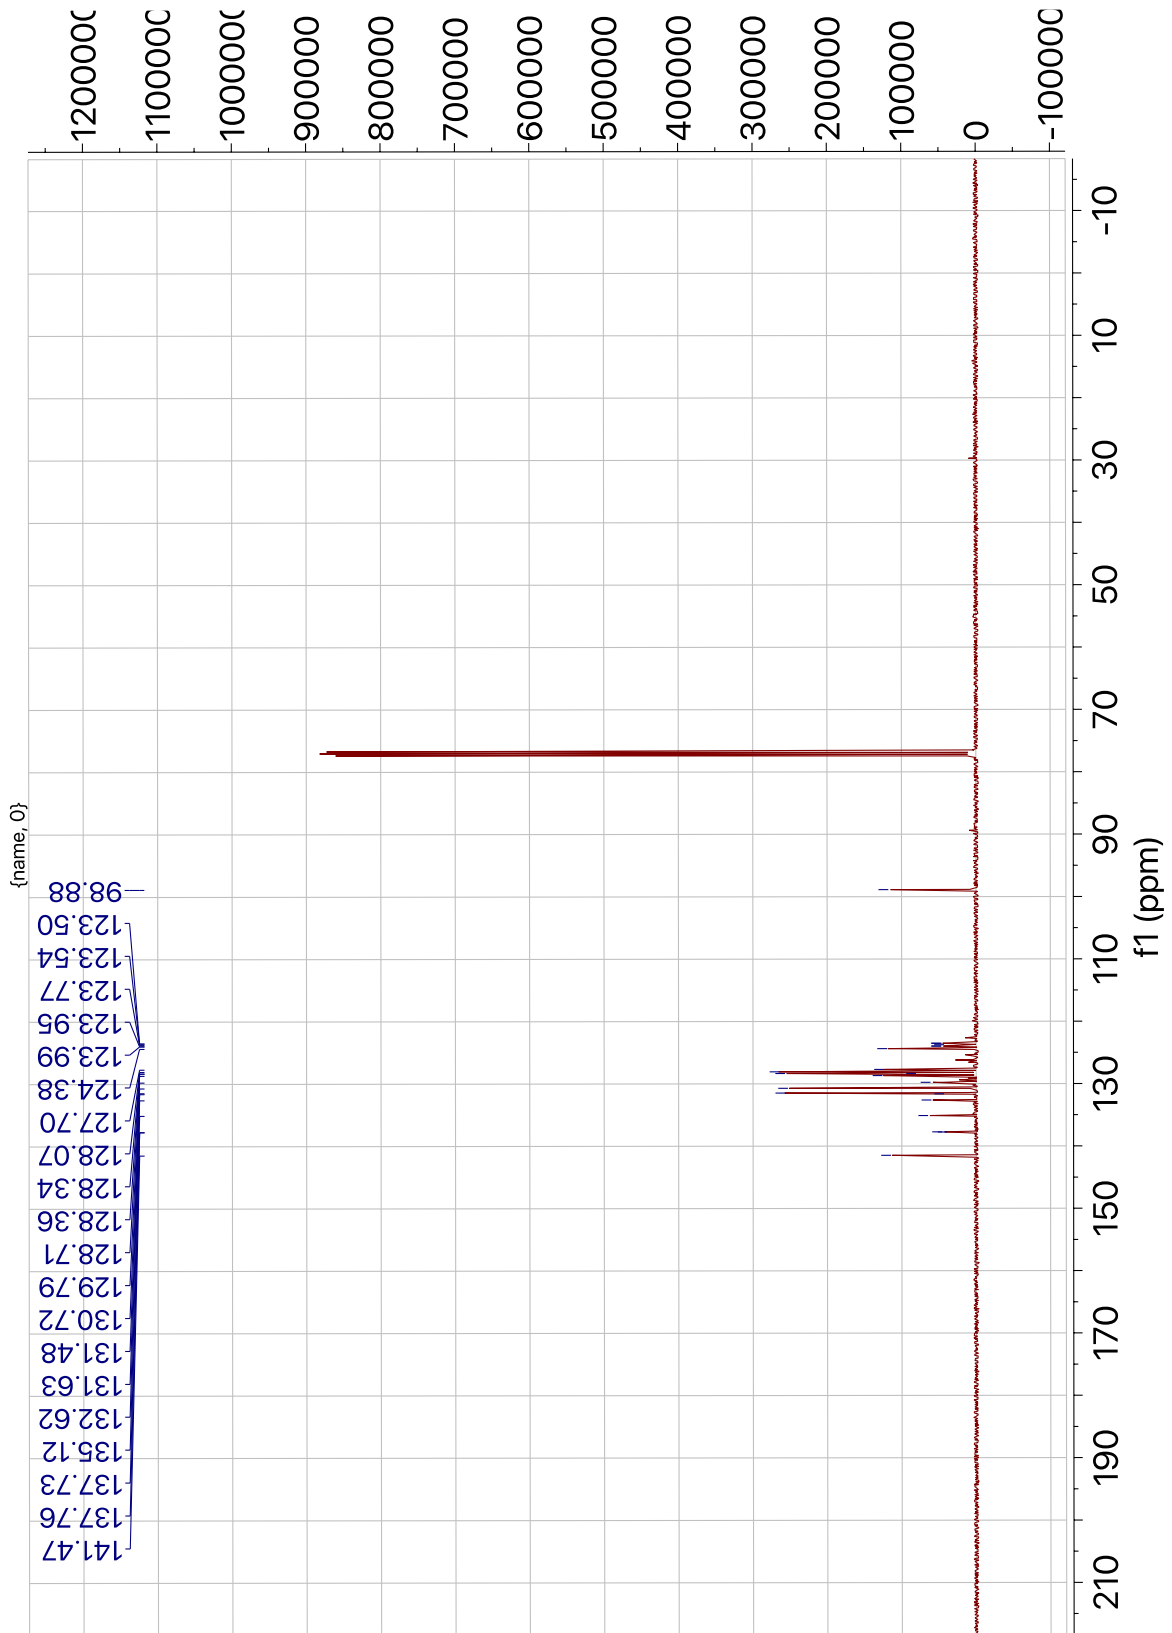

sk.210121.11.fid - 4-CF3-PY-EL - C13CPD CDCl3 /opt/nmrdata/current\_da

Compound 3f,  $^{19}\text{C}$  NMR,  $\text{CDCl}_3$ , 101 MHz

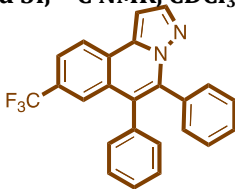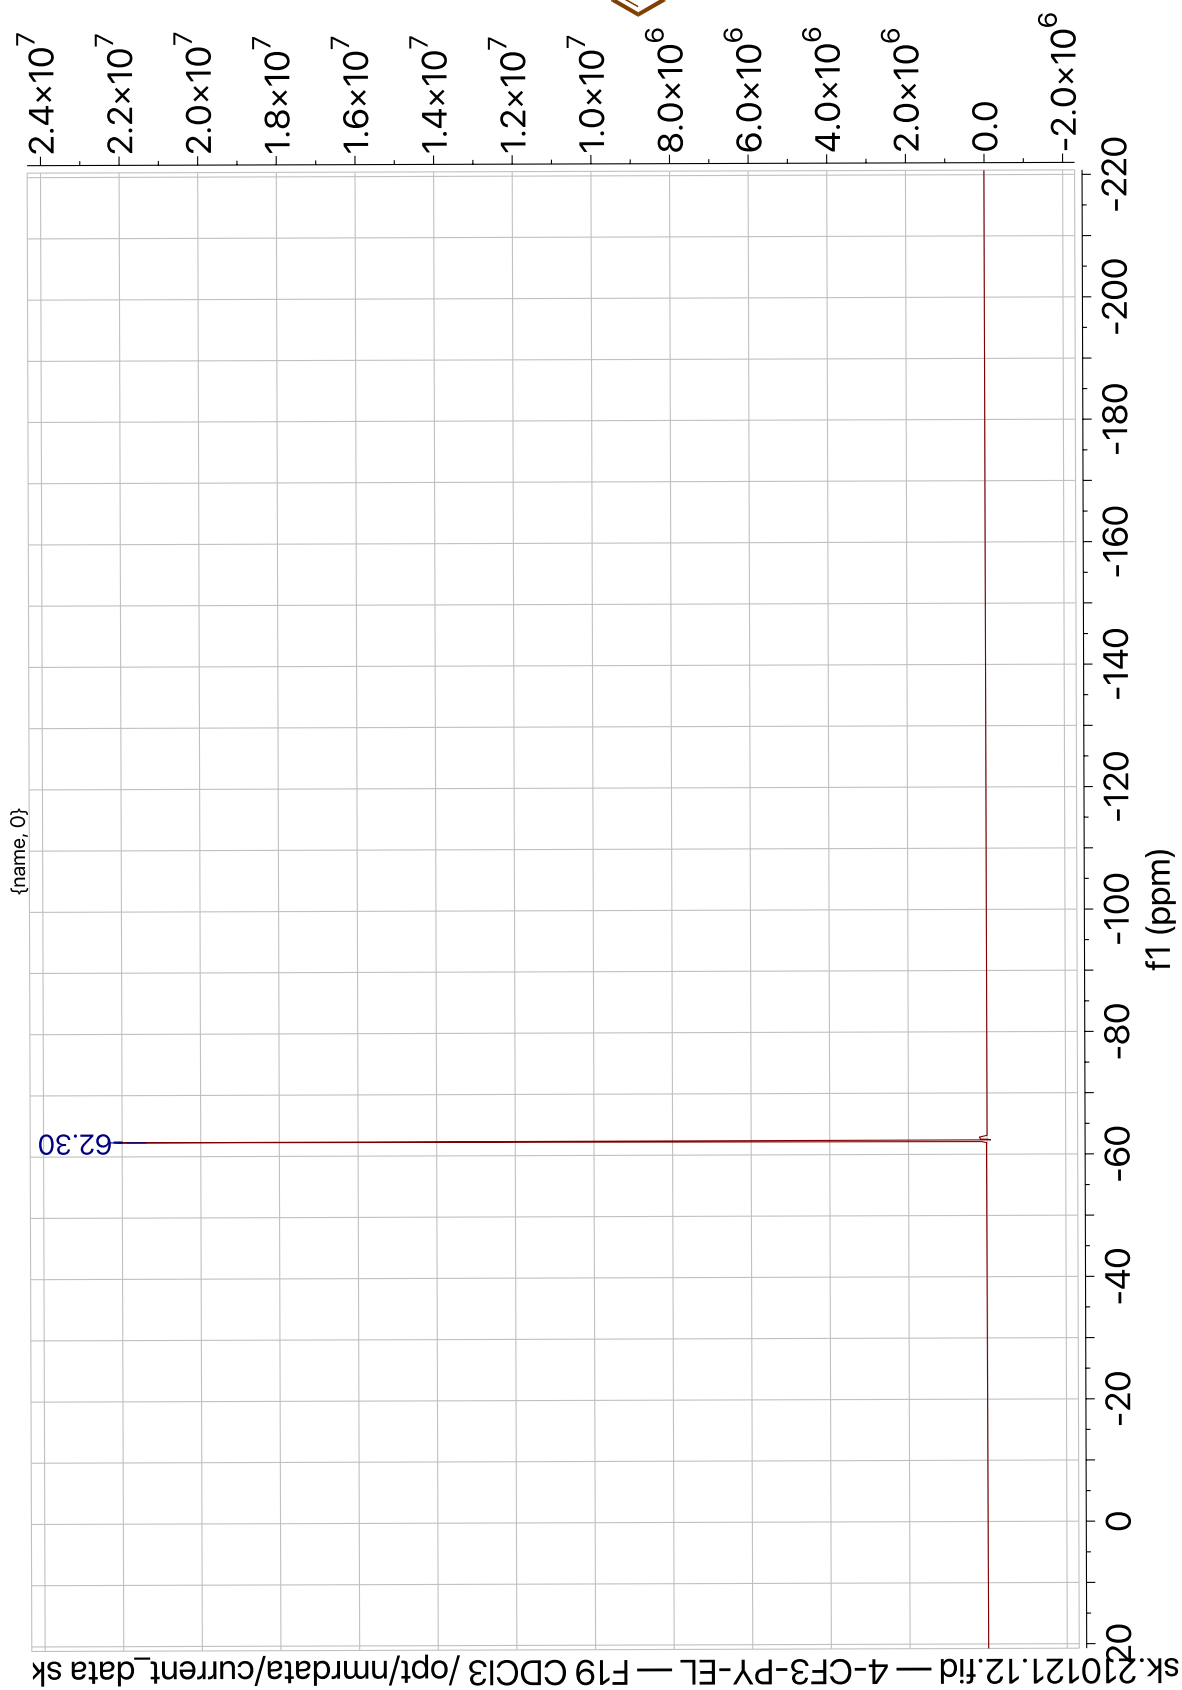

{name, 0}

sk.210121.12.fid - 4-CF3-PY-EL - F19 CDCl3 /opt/nmrdata/current\_data sk

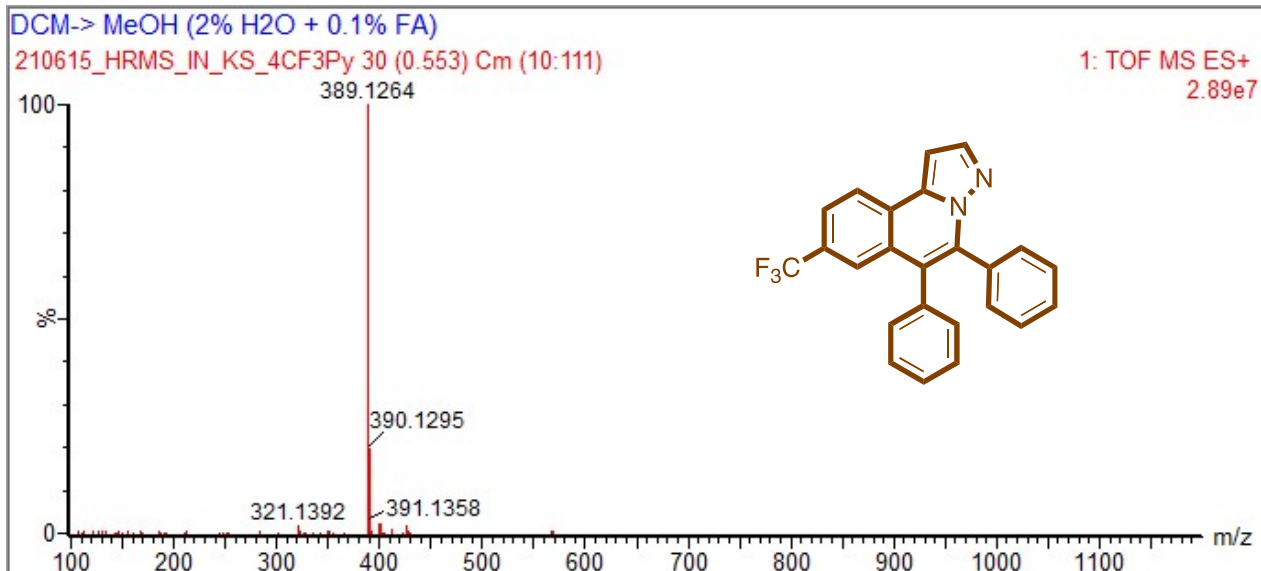

### Single Mass Analysis

Tolerance = 2.0 mDa / DBE: min = -1.5, max = 100.0

Element prediction: Off

Number of isotope peaks used for i-FIT = 3

Monoisotopic Mass, Even Electron Ions

404 formula(e) evaluated with 1 results within limits (all results (up to 1000) for each mass)

Elements Used:

C: 0-50

H: 0-100

N: 0-5

O: 0-3

F: 2-3

Na: 0-1

| Mass     | Calc. Mass | mDa  | PPM  | DBE  | Formula                                                       | Fit Conf % | C  | H  | N | O | F | Na |
|----------|------------|------|------|------|---------------------------------------------------------------|------------|----|----|---|---|---|----|
| 389.1264 | 389.1266   | -0.2 | -0.5 | 16.5 | C <sub>24</sub> H <sub>16</sub> N <sub>2</sub> F <sub>3</sub> | 41.1/a     | 24 | 16 | 2 |   | 3 |    |

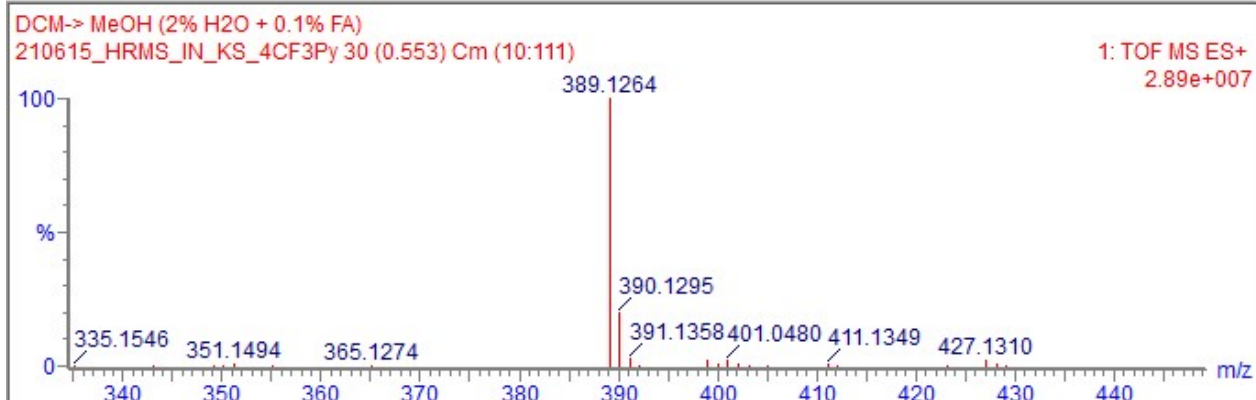

HRMS spectra of **3f**

Compound 3g, <sup>1</sup>H NMR, CDCl<sub>3</sub>, 400 MHz

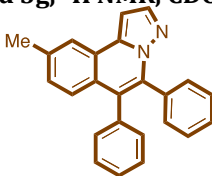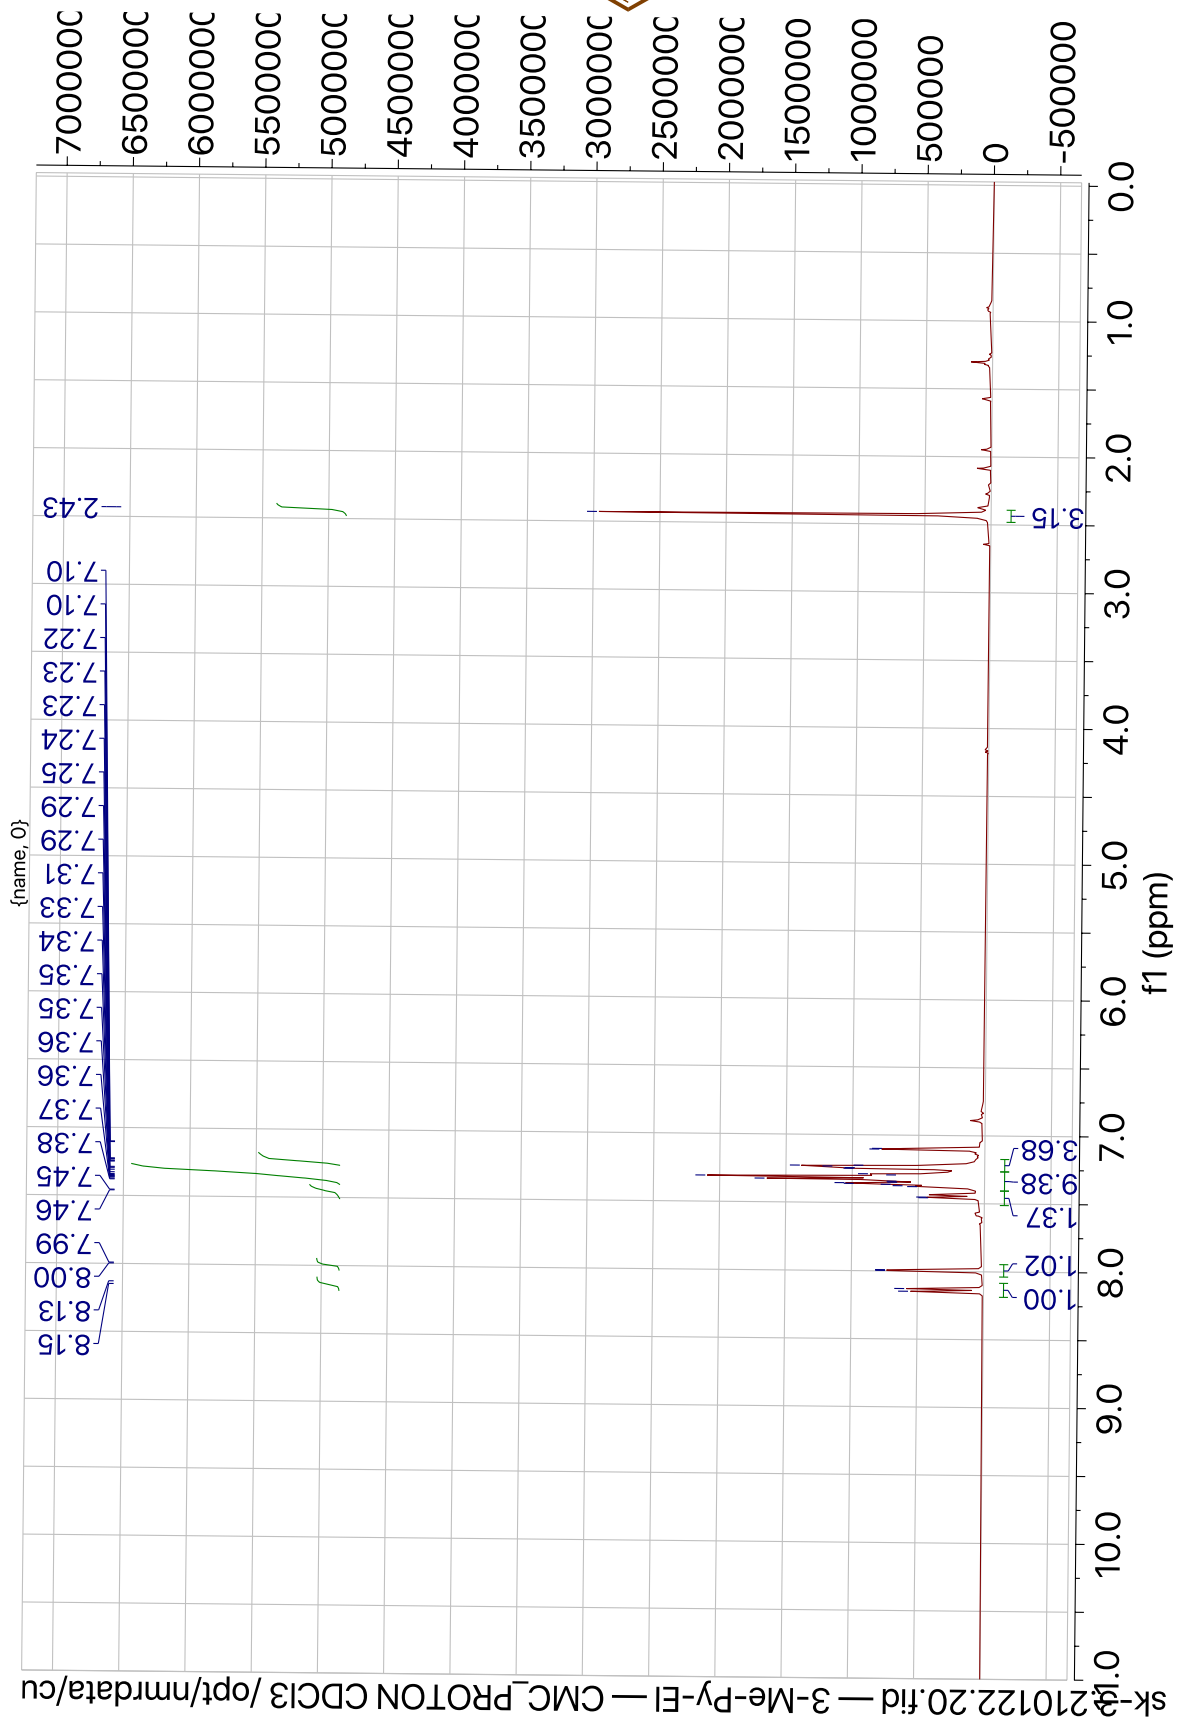

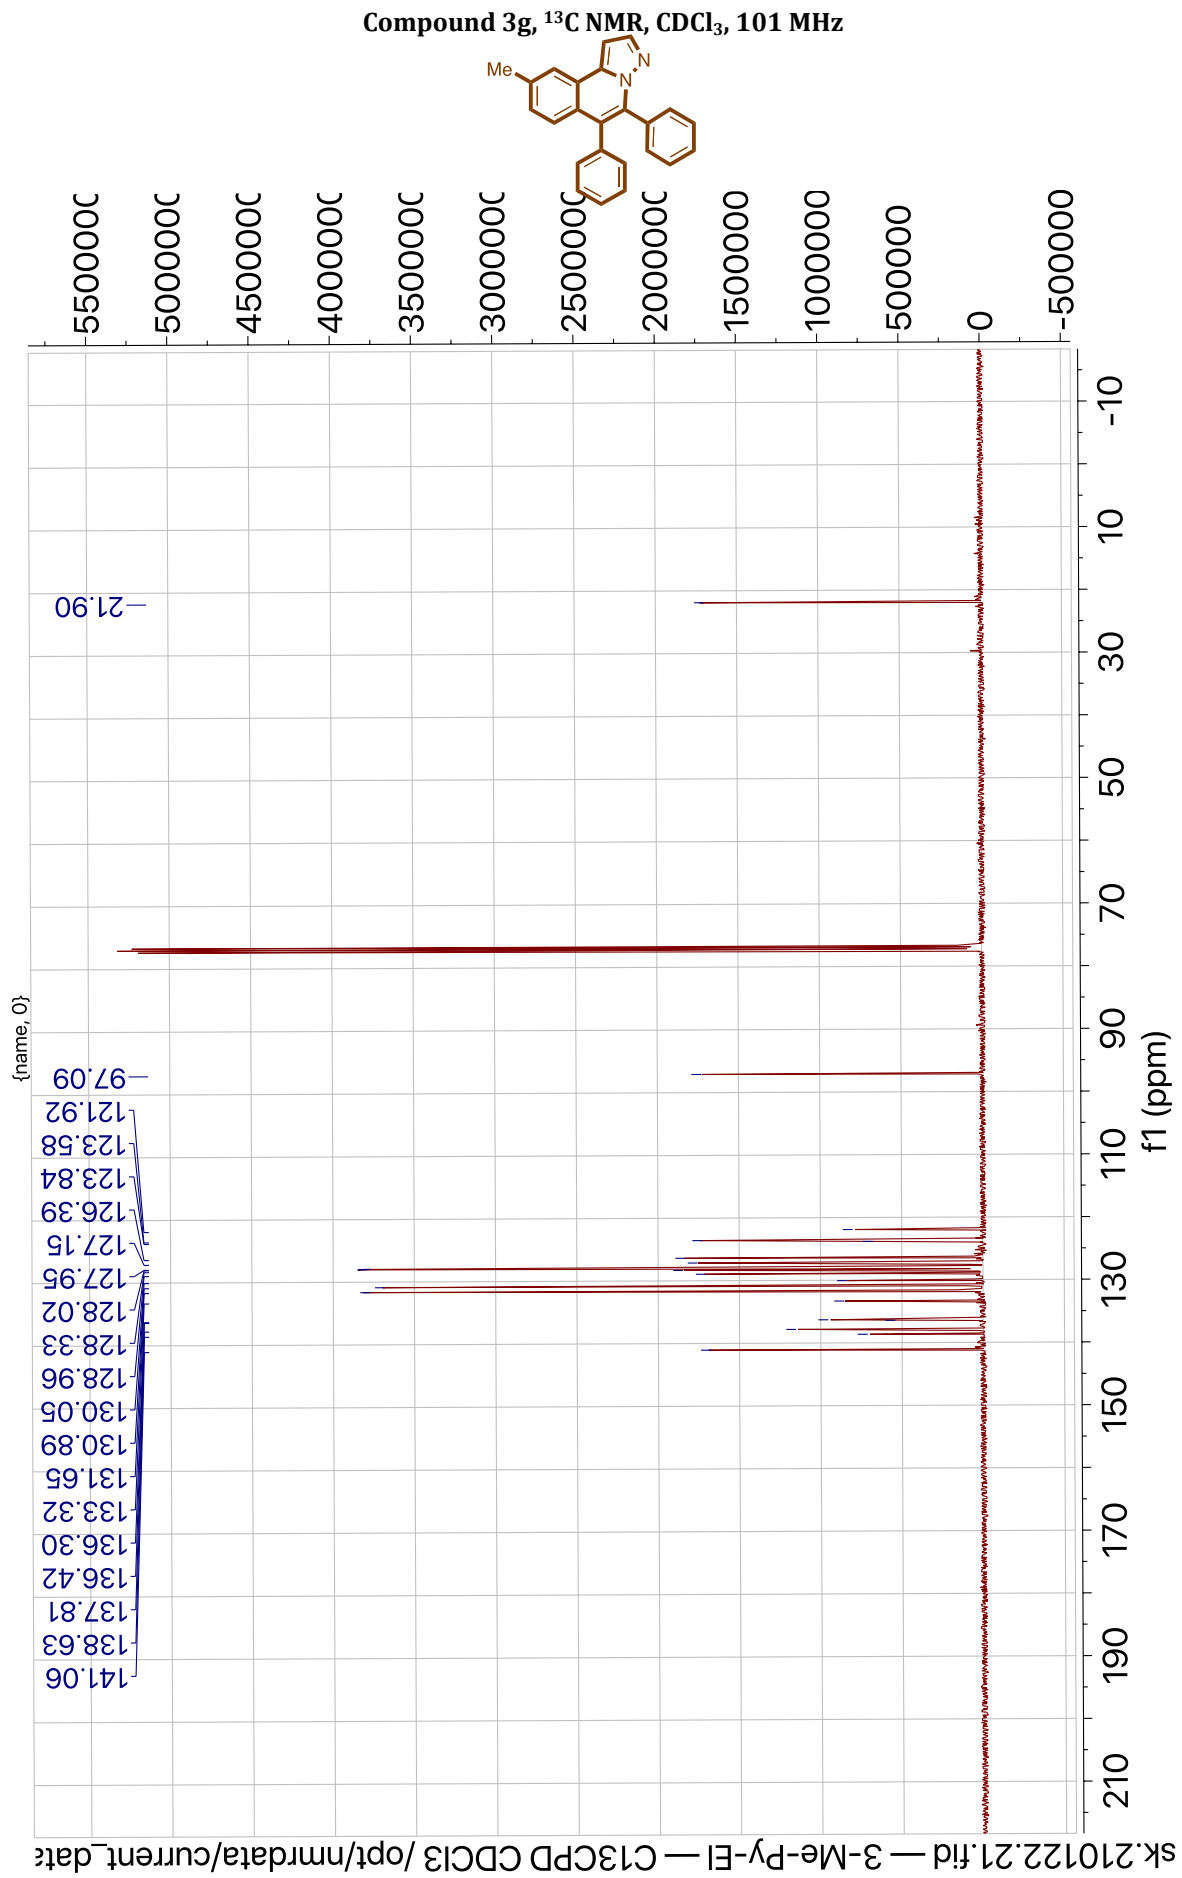

DCM-> MeOH (2% H2O + 0.1% FA)

210615\_HRMS\_IN\_KS\_3MePy 10 (0.201) Cm (10:111)

1: TOF MS ES+  
5.31e7

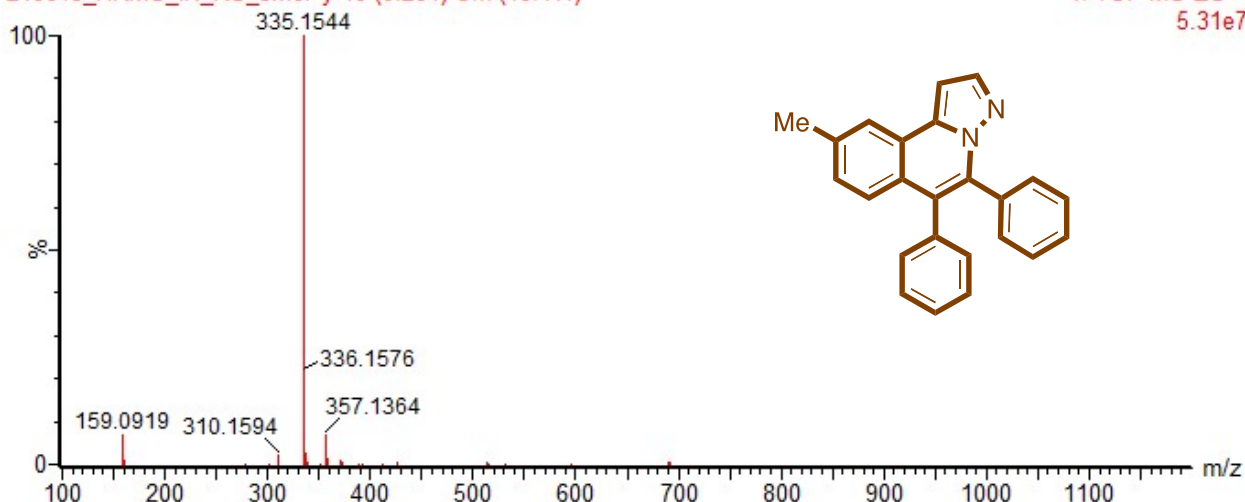

### Single Mass Analysis

Tolerance = 2.0 mDa / DBE: min = -1.5, max = 100.0

Element prediction: Off

Number of isotope peaks used for i-FIT = 3

Monoisotopic Mass, Even Electron Ions

208 formula(e) evaluated with 2 results within limits (all results (up to 1000) for each mass)

Elements Used:

C: 0-50

H: 0-100

N: 0-5

O: 0-3

Na: 0-1

| Mass     | Calc. Mass | mDa  | PPM  | DBE  | Formula       | i... | Fit Conf % | C  | H  | N | O | Na |
|----------|------------|------|------|------|---------------|------|------------|----|----|---|---|----|
| 335.1544 | 335.1548   | -0.4 | -1.2 | 16.5 | C24 H19 N2    | 4... | 17.55      | 24 | 19 | 2 |   |    |
|          | 335.1524   | 2.0  | 6.0  | 13.5 | C22 H20 N2 Na | 4... | 82.45      | 22 | 20 | 2 |   | 1  |

DCM-> MeOH (2% H2O + 0.1% FA)

210615\_HRMS\_IN\_KS\_3MePy 10 (0.201) Cm (10:111)

1: TOF MS ES+  
5.31e+007

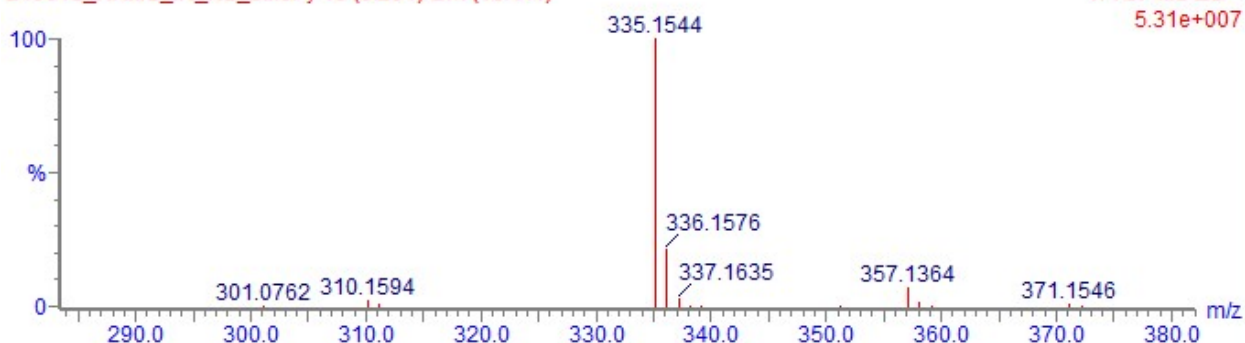

HRMS spectra of **3g**

Compound 3h, <sup>1</sup>H NMR, CDCl<sub>3</sub>, 400 MHz

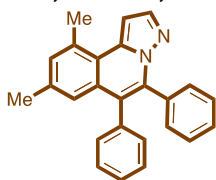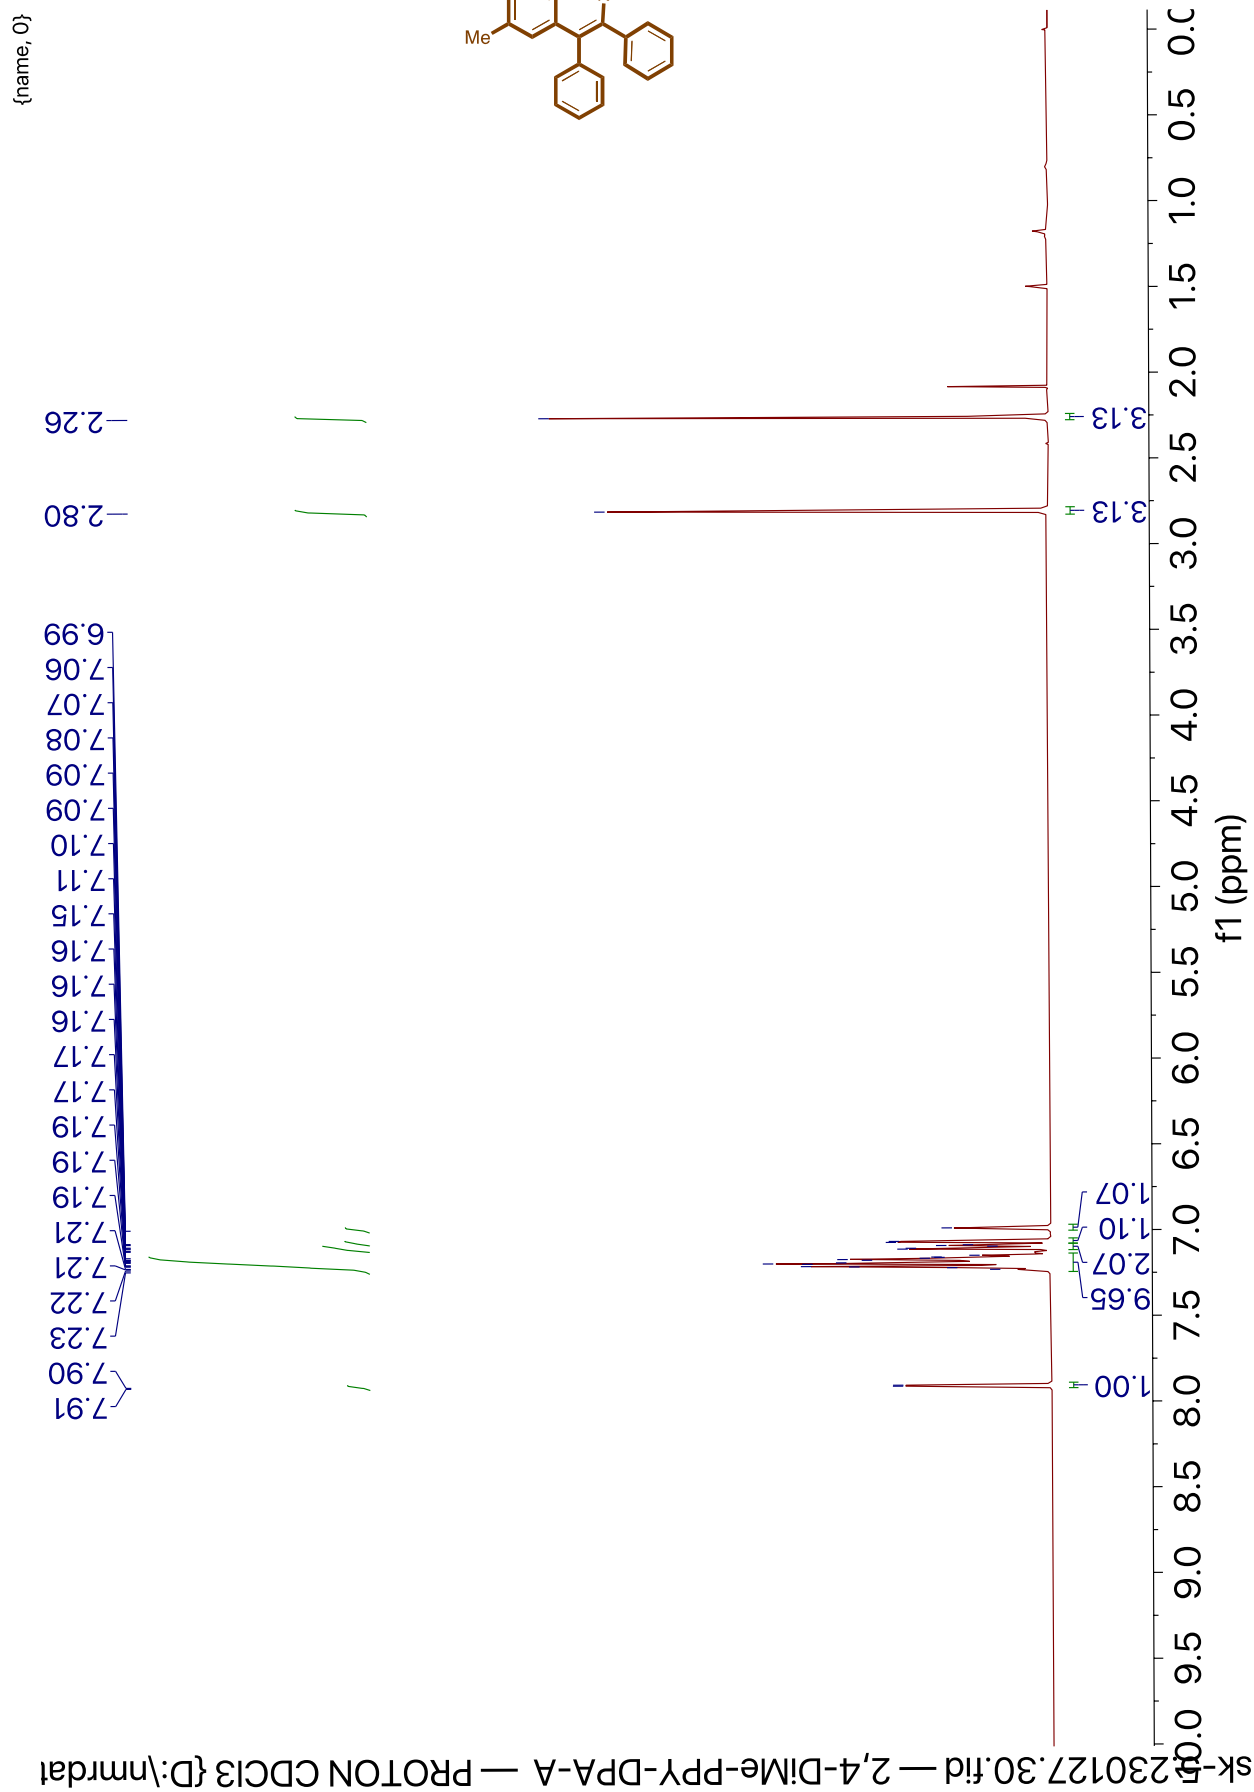

sk-1230127.30.ftd - 2,4-DiMe-PY-DPA-A - PROTON CDCl3 {D:\nmrdat



Compound 3h, <sup>13</sup>C NMR, CDCl<sub>3</sub>, 101 MHz

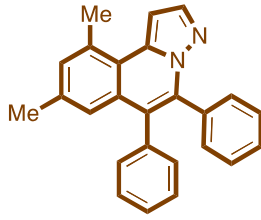

{name, 0}

~23.84  
~21.59

140.71  
137.76  
136.97  
136.89  
136.41  
134.42  
133.75  
131.66  
131.36  
130.80  
128.21  
128.00  
127.95  
127.07  
124.67  
124.28  
121.65  
101.70

sk-6.230127.31.fid - 2,4-DiMe-PY-DPA-A - C13CPD CDCl3 {D:\nmrdate

DCM-> MeOH (2% H2O + 0.1% FA)

210615\_HRMS\_IN\_KS\_24-diMePy 12 (0.234) Cm (11:111)

1: TOF MS ES+  
1.22e7

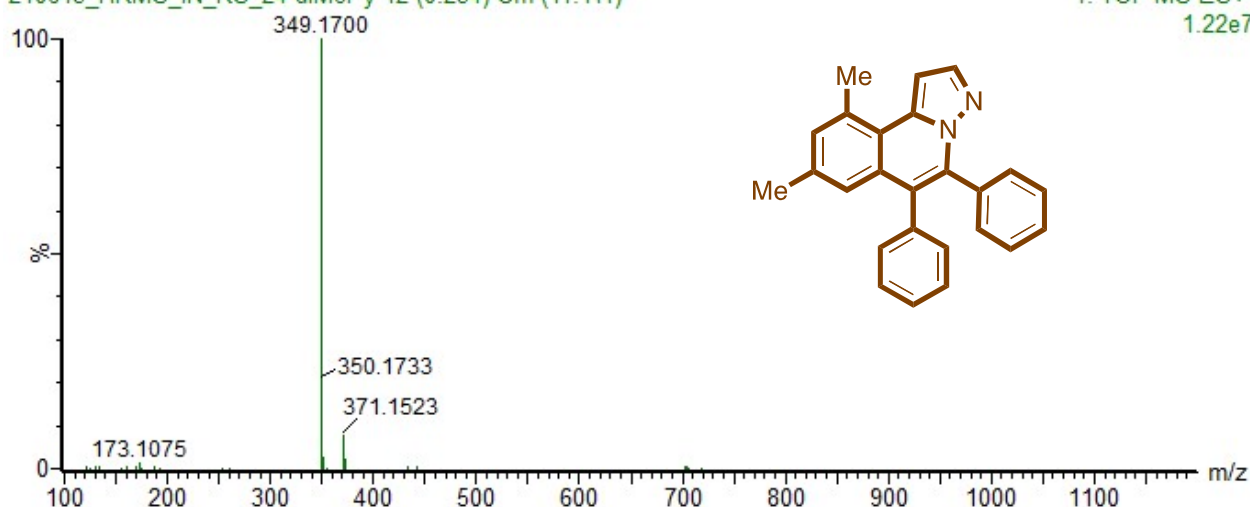

### Single Mass Analysis

Tolerance = 2.0 mDa / DBE: min = -1.5, max = 100.0

Element prediction: Off

Number of isotope peaks used for i-FIT = 3

Monoisotopic Mass, Even Electron Ions

216 formula(e) evaluated with 2 results within limits (all results (up to 1000) for each mass)

Elements Used:

C: 0-50      H: 0-100      N: 0-5      O: 0-3      Na: 0-1

| Mass     | Calc. Mass | mDa  | PPM  | DBE  | Formula                                           | i-Fl... | Fit Conf % | C  | H  | N | O | Na |
|----------|------------|------|------|------|---------------------------------------------------|---------|------------|----|----|---|---|----|
| 349.1700 | 349.1705   | -0.5 | -1.4 | 16.5 | C <sub>25</sub> H <sub>21</sub> N <sub>2</sub>    | 6.683   | 18.58      | 25 | 21 | 2 |   |    |
|          | 349.1681   | 1.9  | 5.4  | 13.5 | C <sub>23</sub> H <sub>22</sub> N <sub>2</sub> Na | 5.206   | 81.42      | 23 | 22 | 2 |   | 1  |

DCM-> MeOH (2% H2O + 0.1% FA)

210615\_HRMS\_IN\_KS\_24-diMePy 12 (0.234) Cm (11:111)

1: TOF MS ES+  
1.22e+007

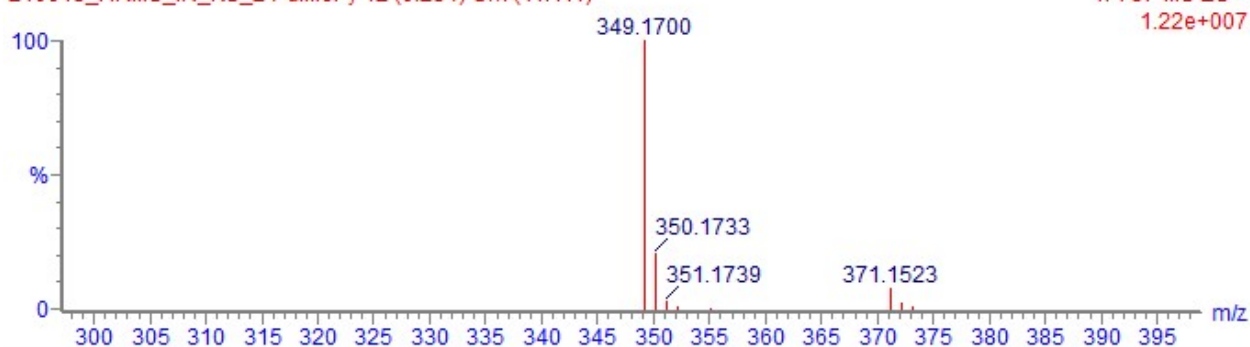

HRMS spectra of **3h**

Compound 3i, <sup>1</sup>H NMR, CDCl<sub>3</sub>, 400 MHz

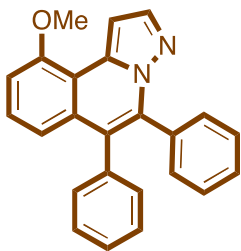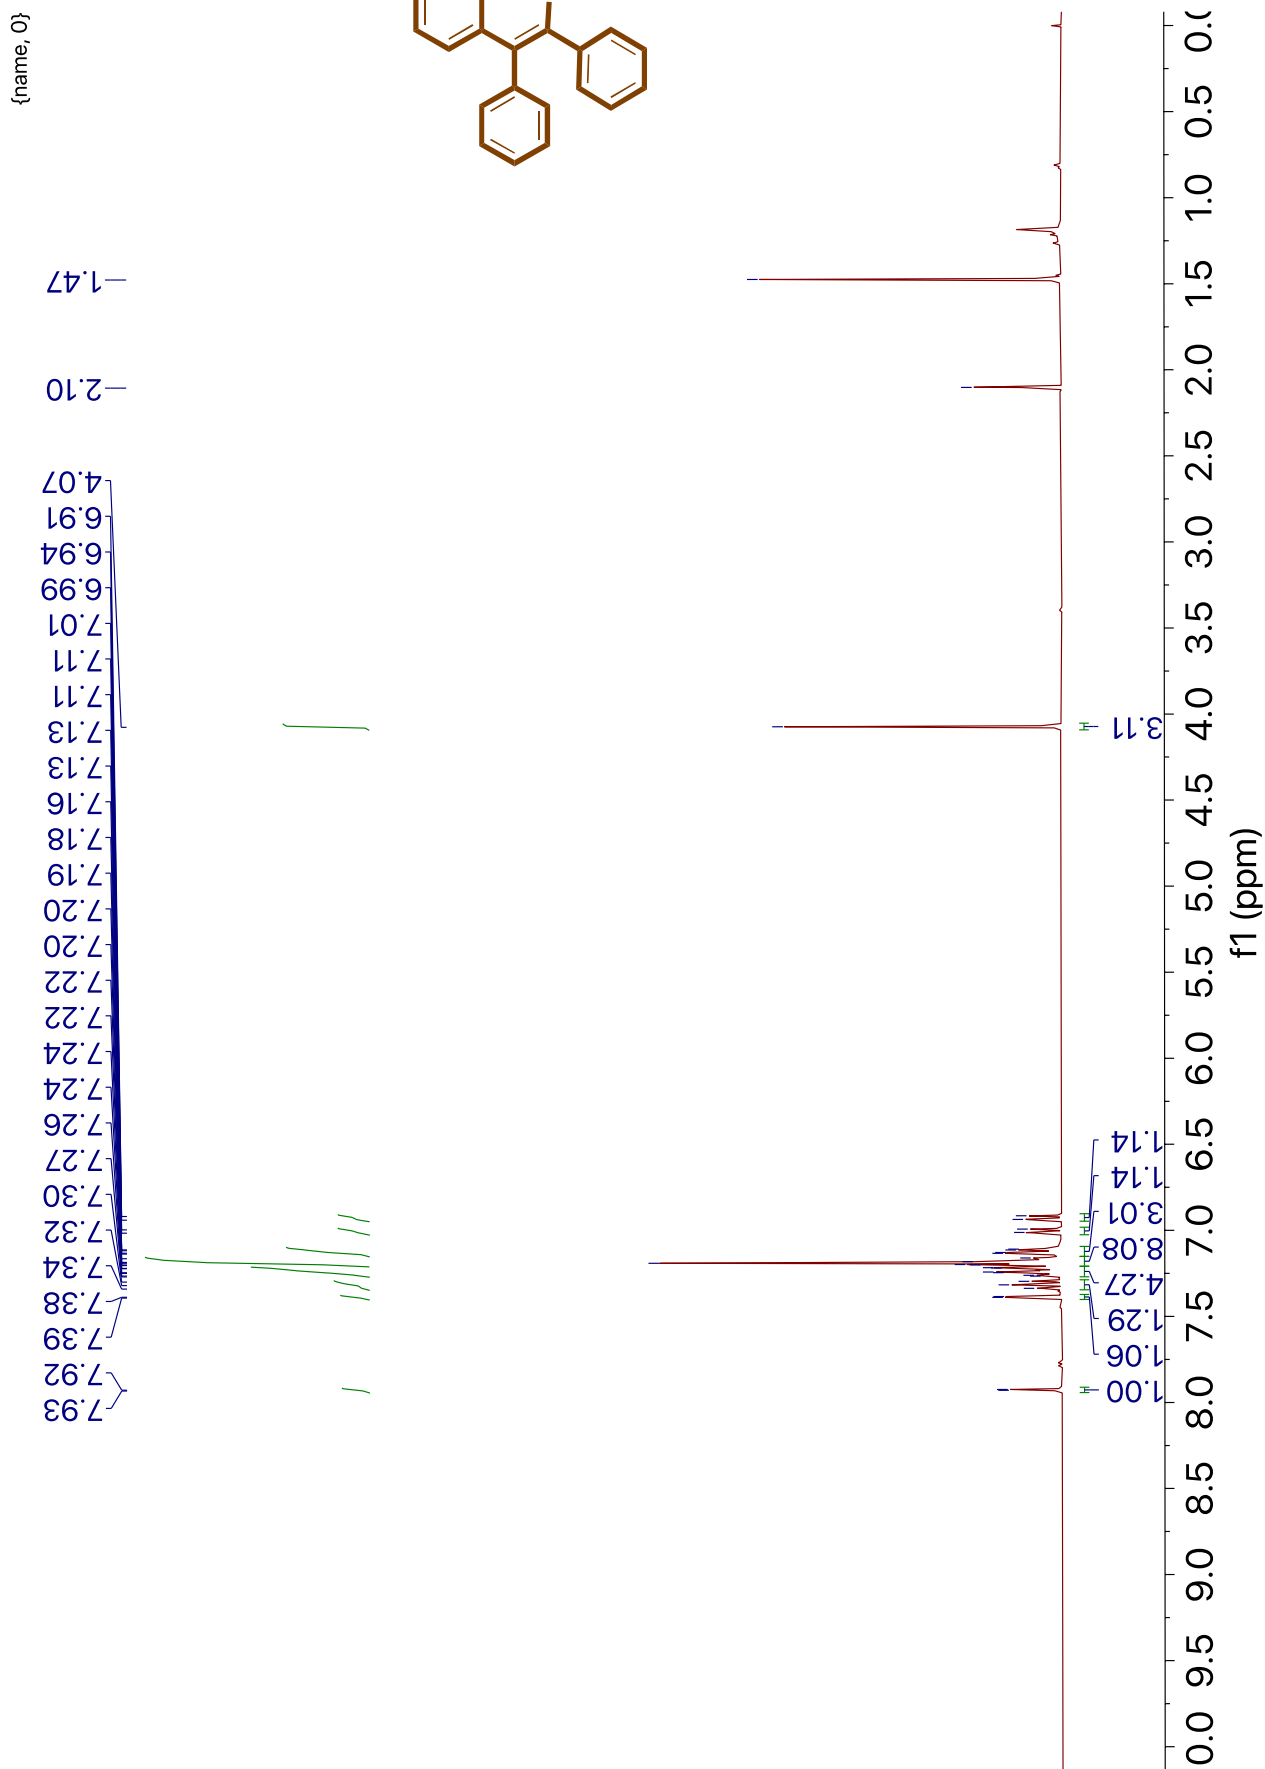

sk-3 230126.40.fid - 2-OMe-PY-DPA-A - PROTON CDCl3 {D:\nmrdata\

Compound 3i, <sup>13</sup>C NMR, CDCl<sub>3</sub>, 101 MHz

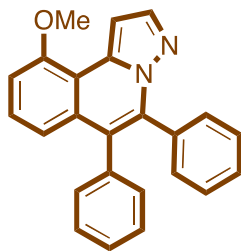

{name, 0}

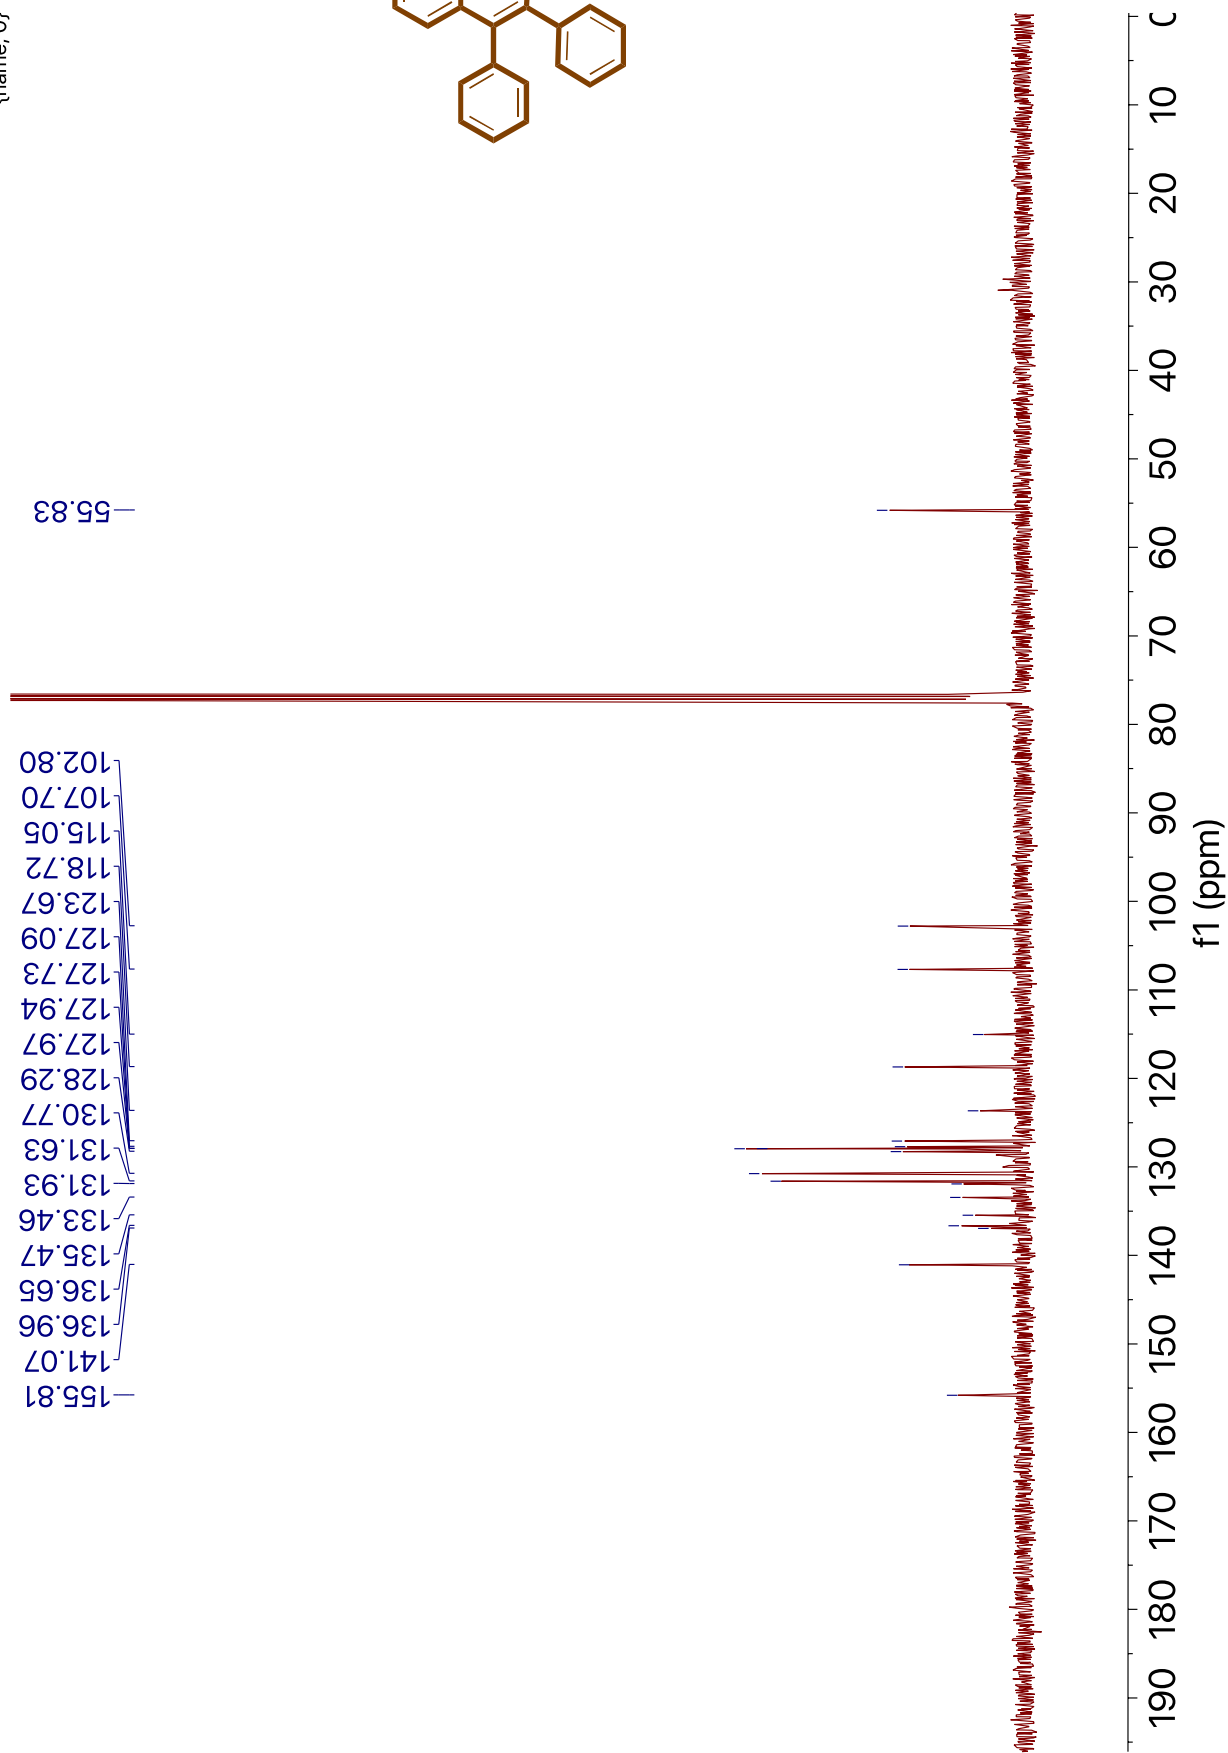

sk-9.230126.41.fid - 2-OMe-PY-DPA-A - C13CPD CDCl3 {D:\nmrdata\c

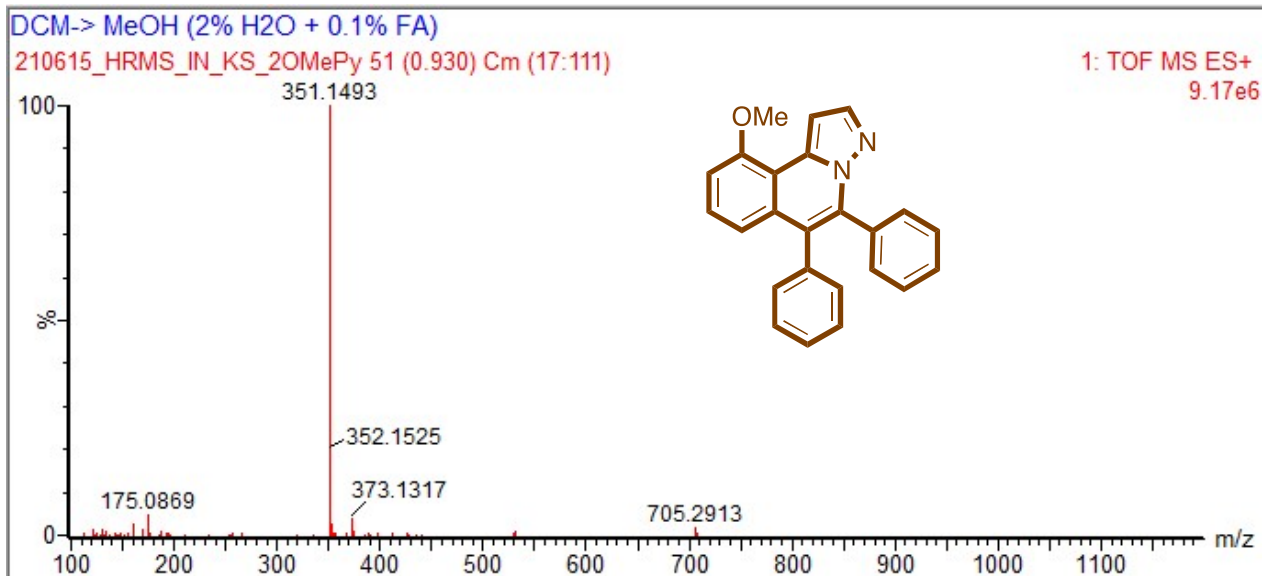

### Single Mass Analysis

Tolerance = 2.0 mDa / DBE: min = -1.5, max = 100.0

Element prediction: Off

Number of isotope peaks used for i-FIT = 3

Monoisotopic Mass, Even Electron Ions

216 formula(e) evaluated with 2 results within limits (all results (up to 1000) for each mass)

Elements Used:

C: 0-50      H: 0-100      N: 0-5      O: 0-3      Na: 0-1

| Mass     | Calc. Mass | mDa  | PPM  | DBE  | Formula                                             | i...  | Fit Conf % | C  | H  | N | O | Na |
|----------|------------|------|------|------|-----------------------------------------------------|-------|------------|----|----|---|---|----|
| 351.1493 | 351.1497   | -0.4 | -1.1 | 16.5 | C <sub>24</sub> H <sub>19</sub> N <sub>2</sub> O    | 30... | 45.56      | 24 | 19 | 2 | 1 |    |
|          | 351.1473   | 2.0  | 5.7  | 13.5 | C <sub>22</sub> H <sub>20</sub> N <sub>2</sub> O Na | 30... | 54.44      | 22 | 20 | 2 | 1 | 1  |

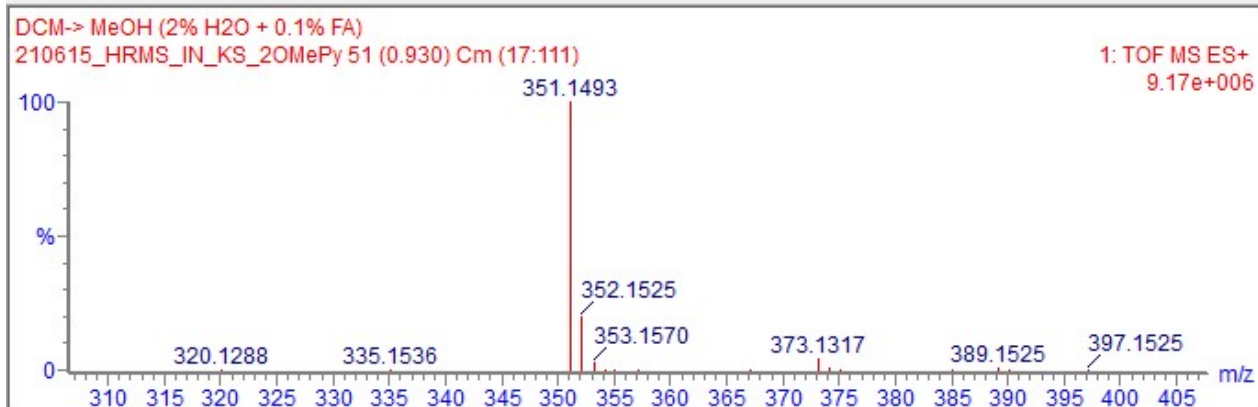

HRMS spectra of **3i**

Compound 3J, <sup>1</sup>H NMR, CDCl<sub>3</sub>, 400 MHz

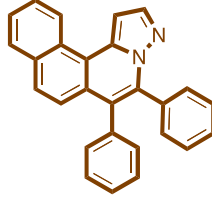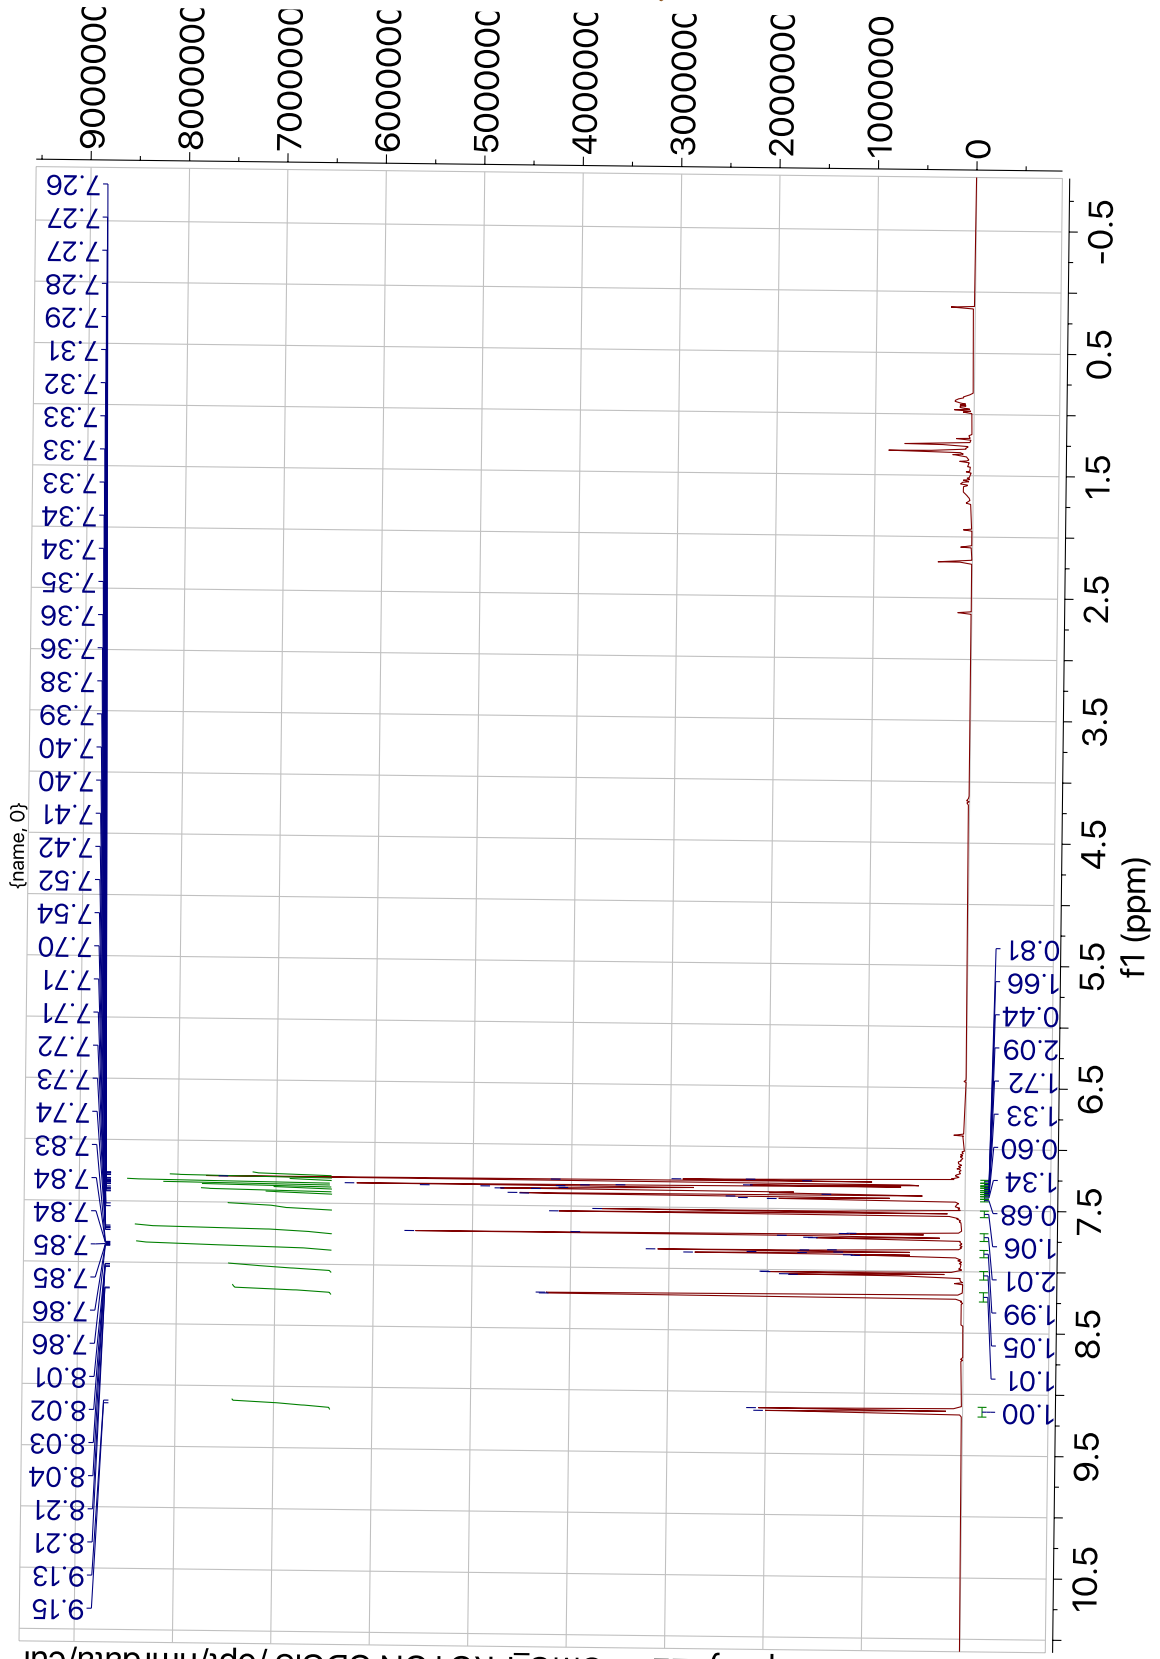

sk.210203.10.fid - 1-Nap-Py-EL - CMC\_PROTON CDCl3 /opt/nmrdata/cur

Compound 3J, <sup>13</sup>C NMR, CDCl<sub>3</sub>, 101 MHz

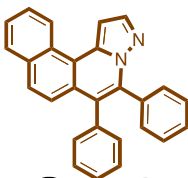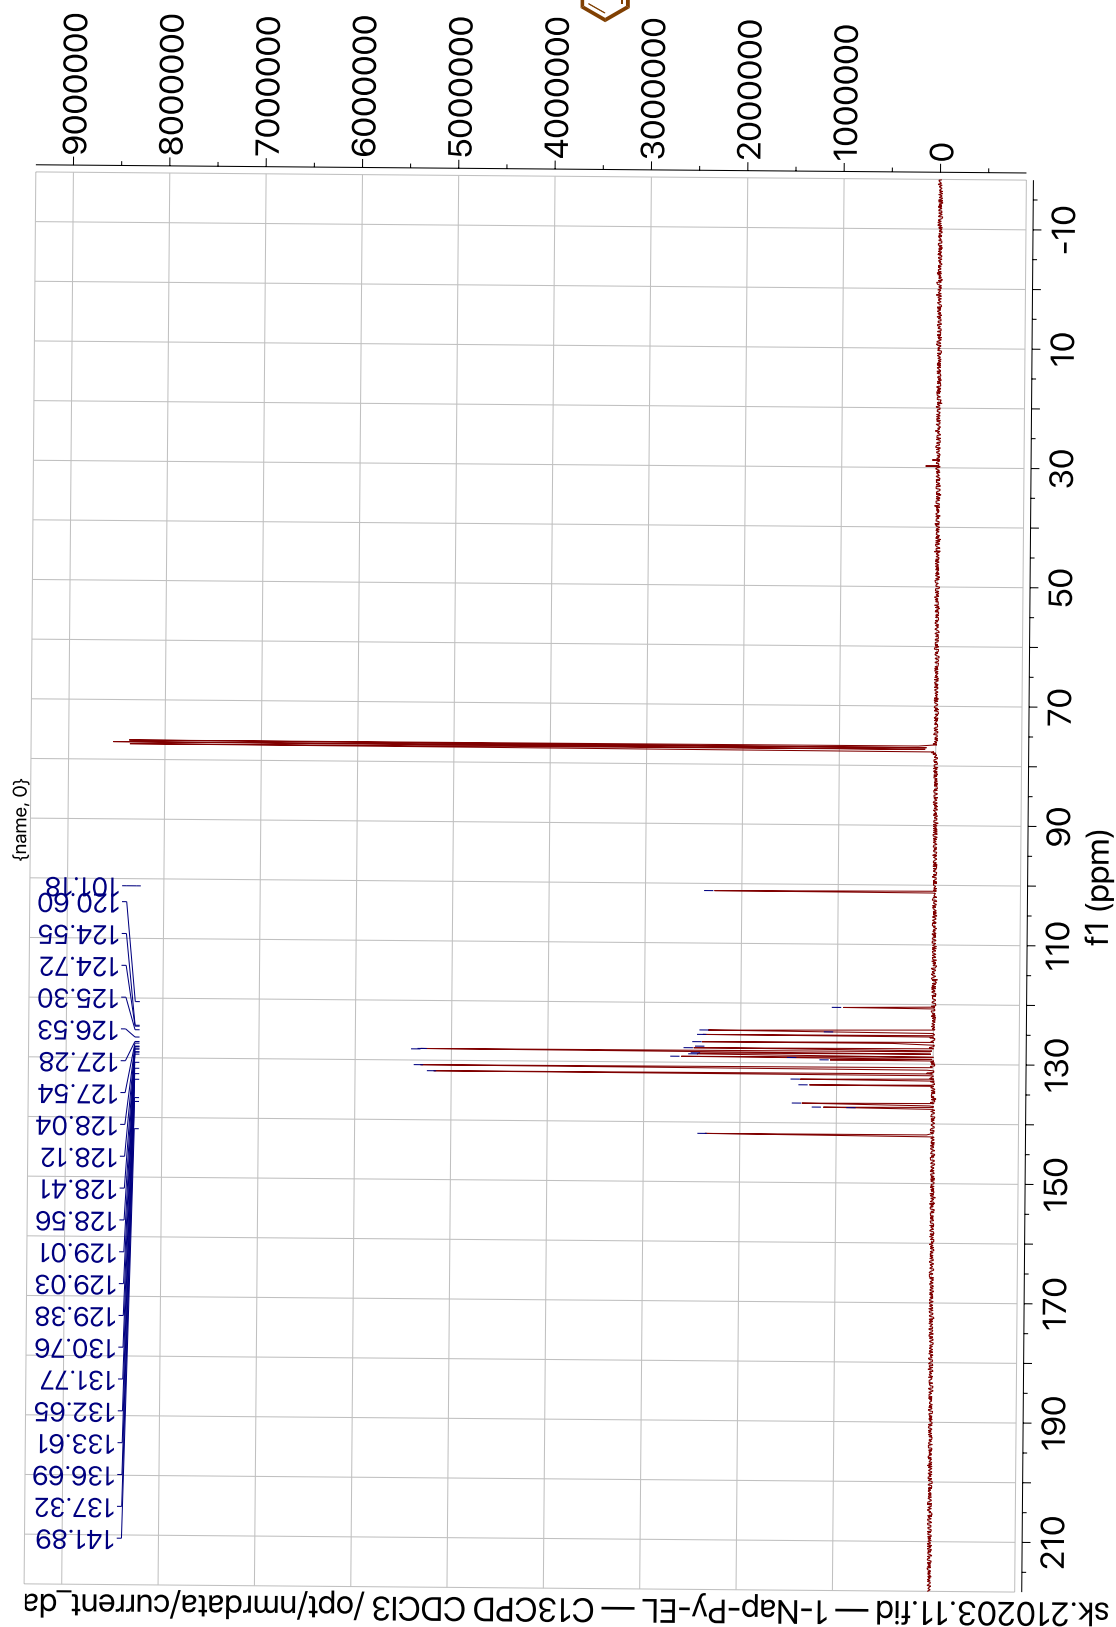

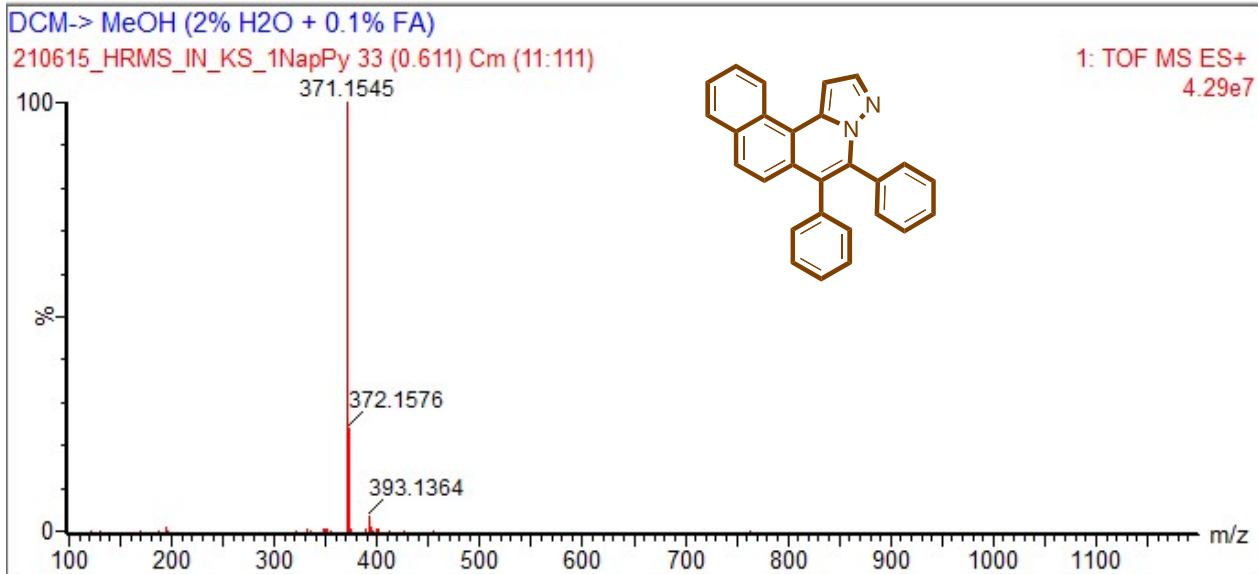

### Single Mass Analysis

Tolerance = 2.0 mDa / DBE: min = -1.5, max = 100.0

Element prediction: Off

Number of isotope peaks used for i-FIT = 3

Monoisotopic Mass, Even Electron Ions

227 formula(e) evaluated with 1 results within limits (all results (up to 1000) for each mass)

Elements Used:

C: 0-50      H: 0-100      N: 0-5      O: 0-3      Na: 0-1

| Mass     | Calc. Mass | mDa  | PPM  | DBE  | Formula                                        | i-FIT Norm | Fit Conf % | C  | H  | N | O | Na |
|----------|------------|------|------|------|------------------------------------------------|------------|------------|----|----|---|---|----|
| 371.1545 | 371.1548   | -0.3 | -0.8 | 19.5 | C <sub>27</sub> H <sub>19</sub> N <sub>2</sub> | n/a        | n/a        | 27 | 19 | 2 |   |    |

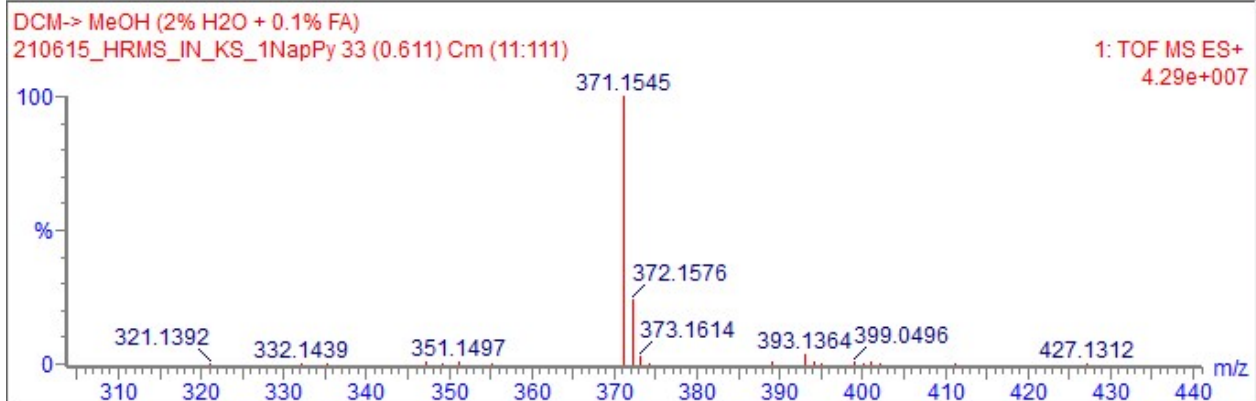

HRMS spectra of **3j**



Compound 3K+3K', <sup>1</sup>H NMR, CDCl<sub>3</sub>, 400 MHz

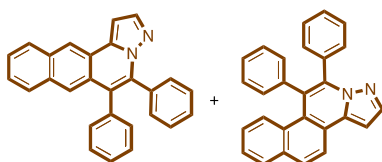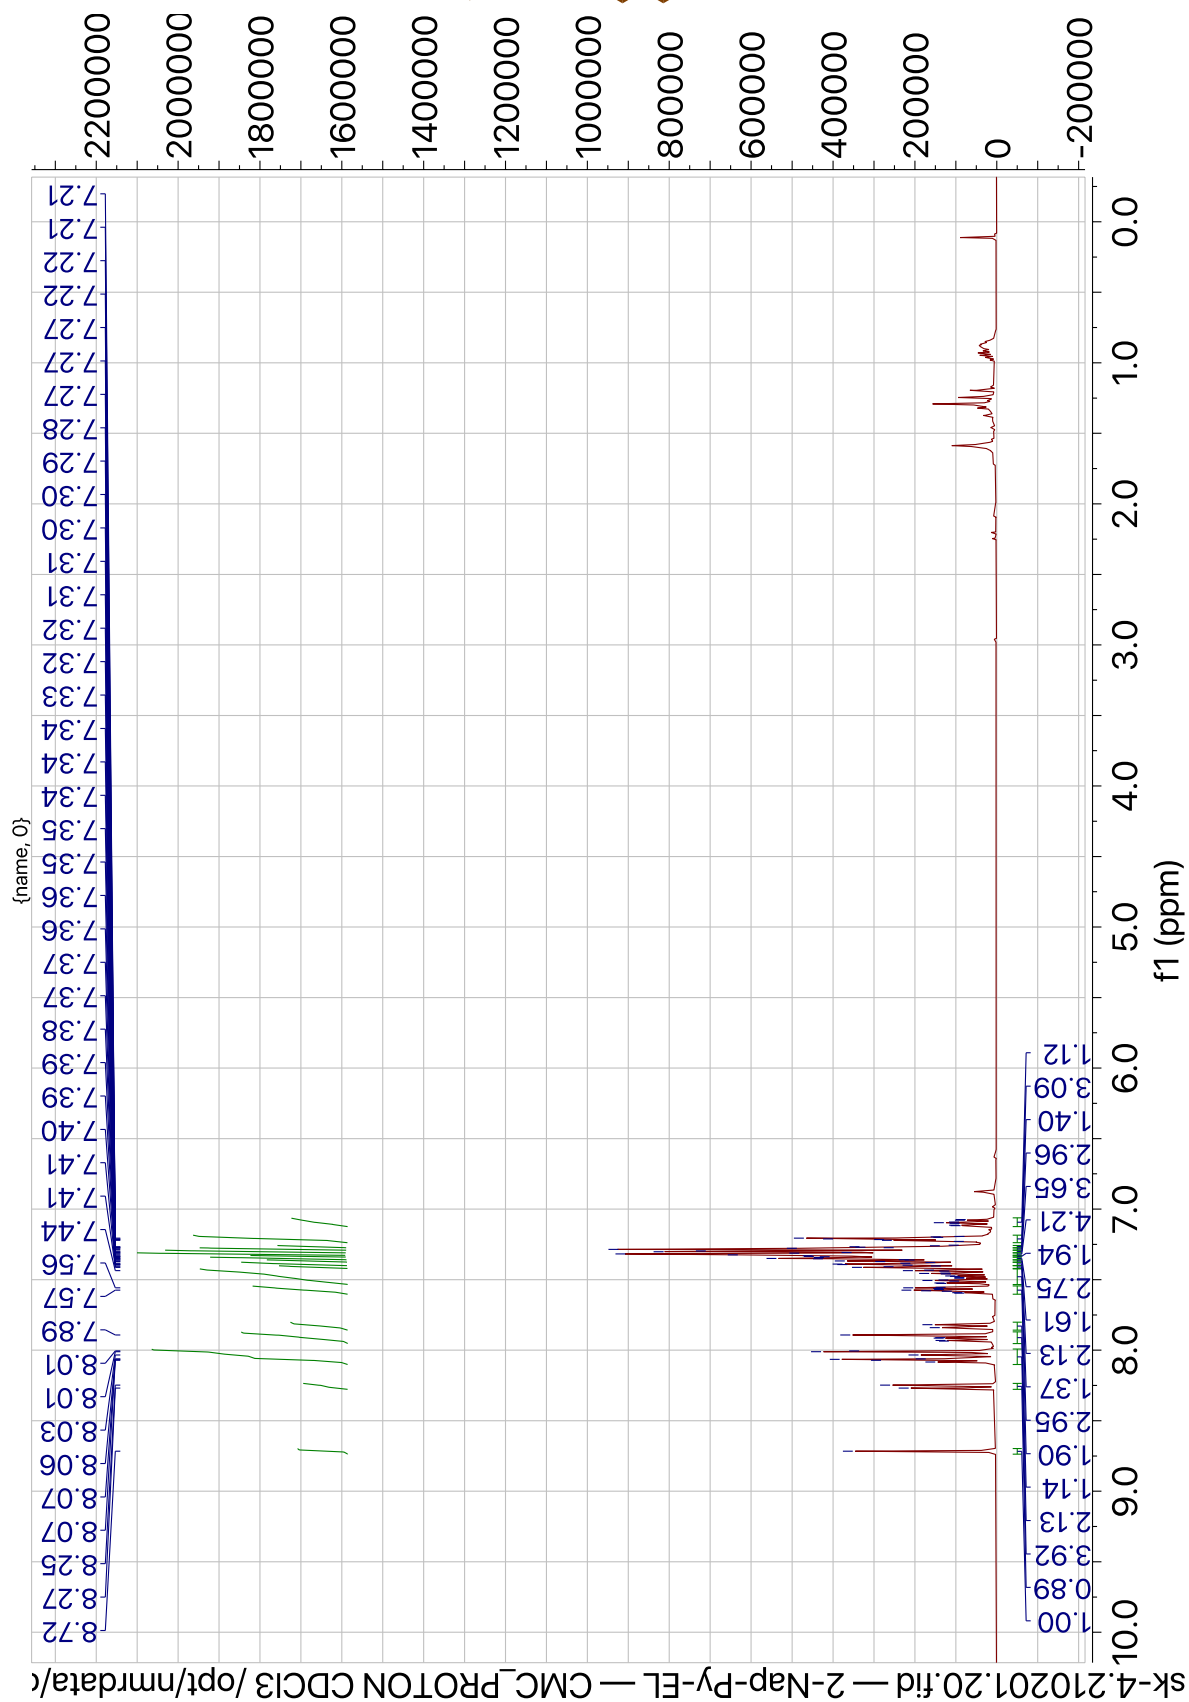

Compound 3K+3K', <sup>13</sup>C NMR, CDCl<sub>3</sub>, 101 MHZ

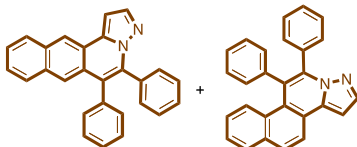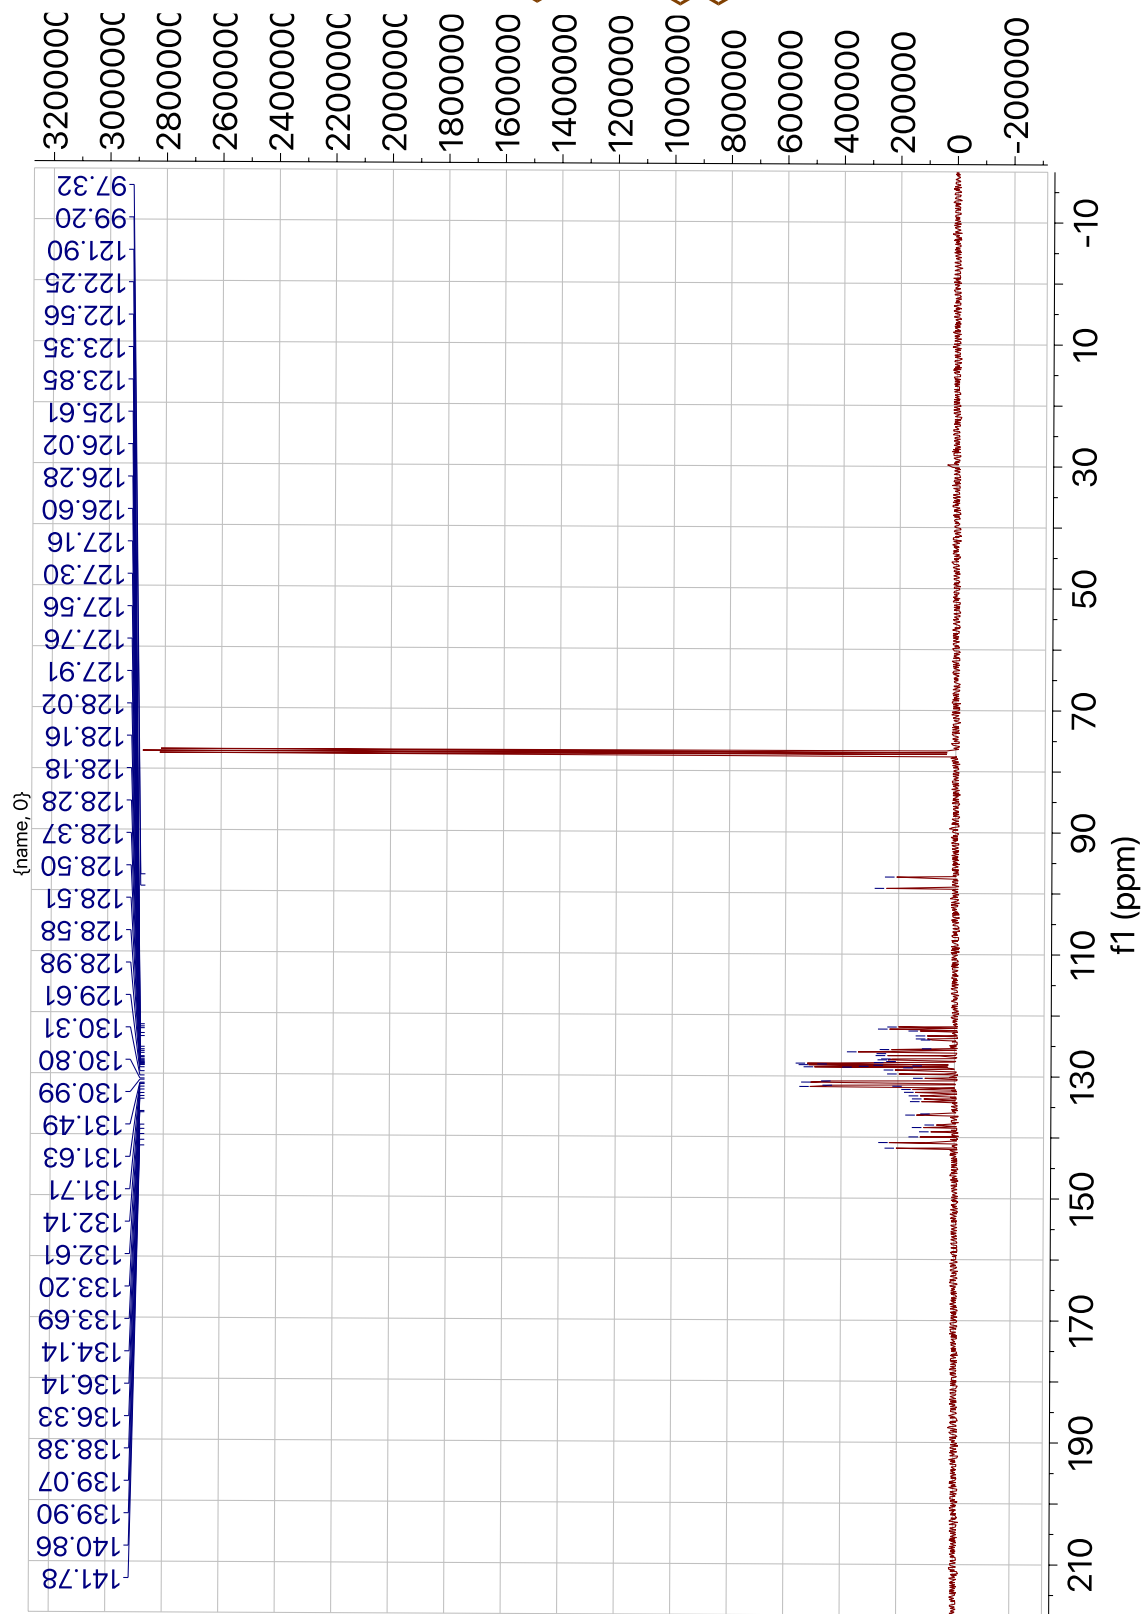

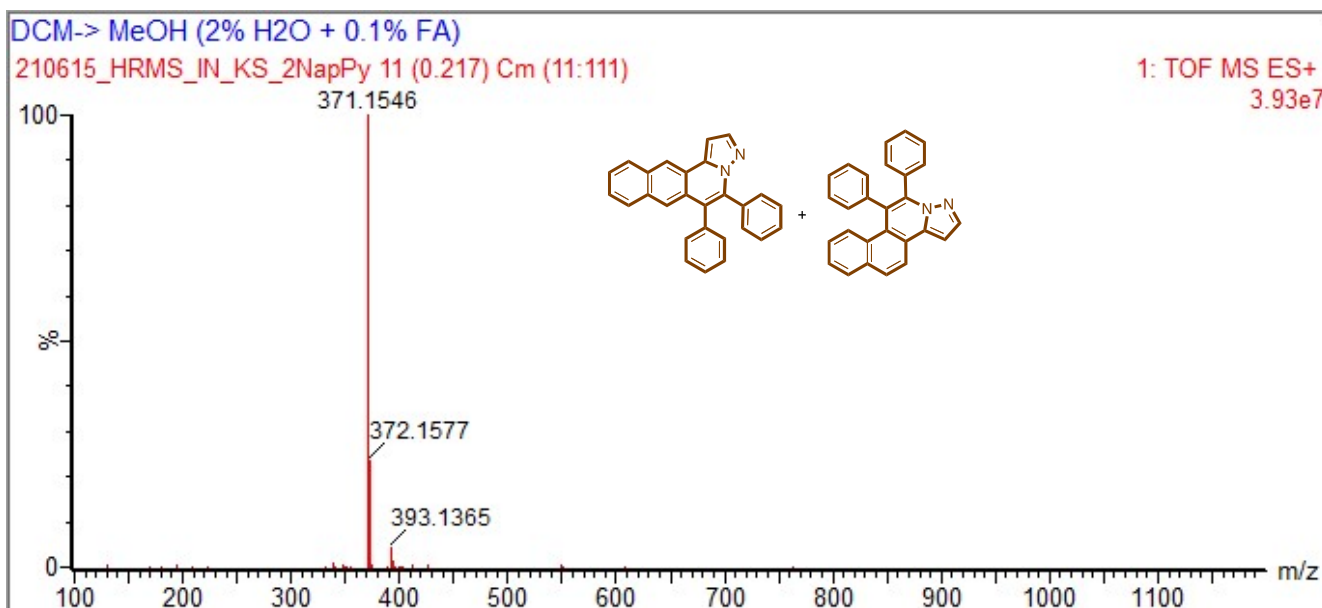

### Single Mass Analysis

Tolerance = 2.0 mDa / DBE: min = -1.5, max = 100.0

Element prediction: Off

Number of isotope peaks used for i-FIT = 3

Monoisotopic Mass, Even Electron Ions

227 formula(e) evaluated with 1 results within limits (all results (up to 1000) for each mass)

Elements Used:

C: 0-50      H: 0-100      N: 0-5      O: 0-3      Na: 0-1

| Mass     | Calc. Mass | mDa  | PPM  | DBE  | Formula    | i-FIT | i-FIT Norm | Fit Conf % | C  | H  | N | O | Na |
|----------|------------|------|------|------|------------|-------|------------|------------|----|----|---|---|----|
| 371.1546 | 371.1548   | -0.2 | -0.5 | 19.5 | C27 H19 N2 | 40.1  | n/a        | n/a        | 27 | 19 | 2 |   |    |

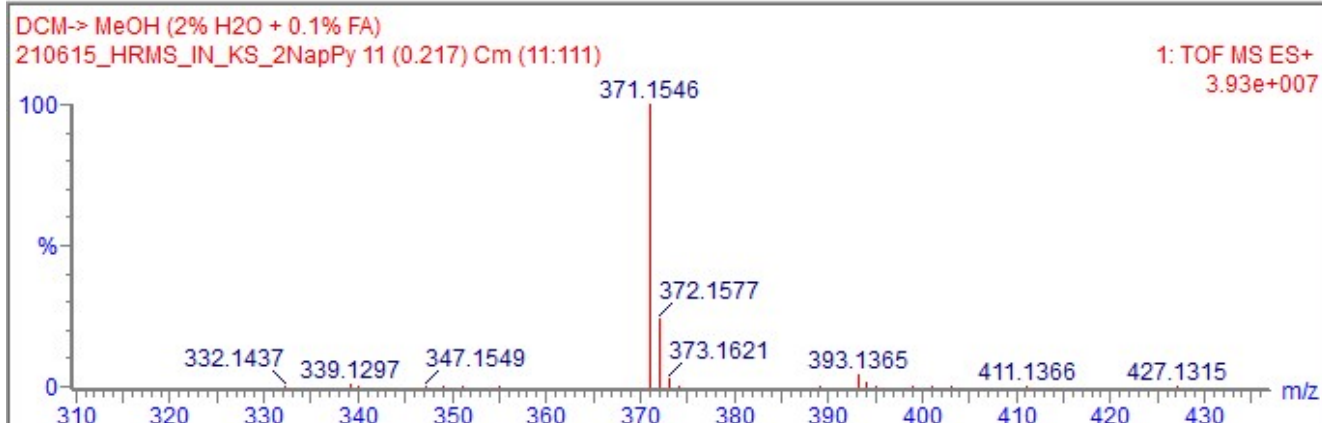

HRMS spectra of 3K + 3K'

Compound 5a, <sup>1</sup>H NMR, CDCl<sub>3</sub>, 400 MHz

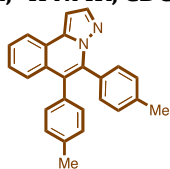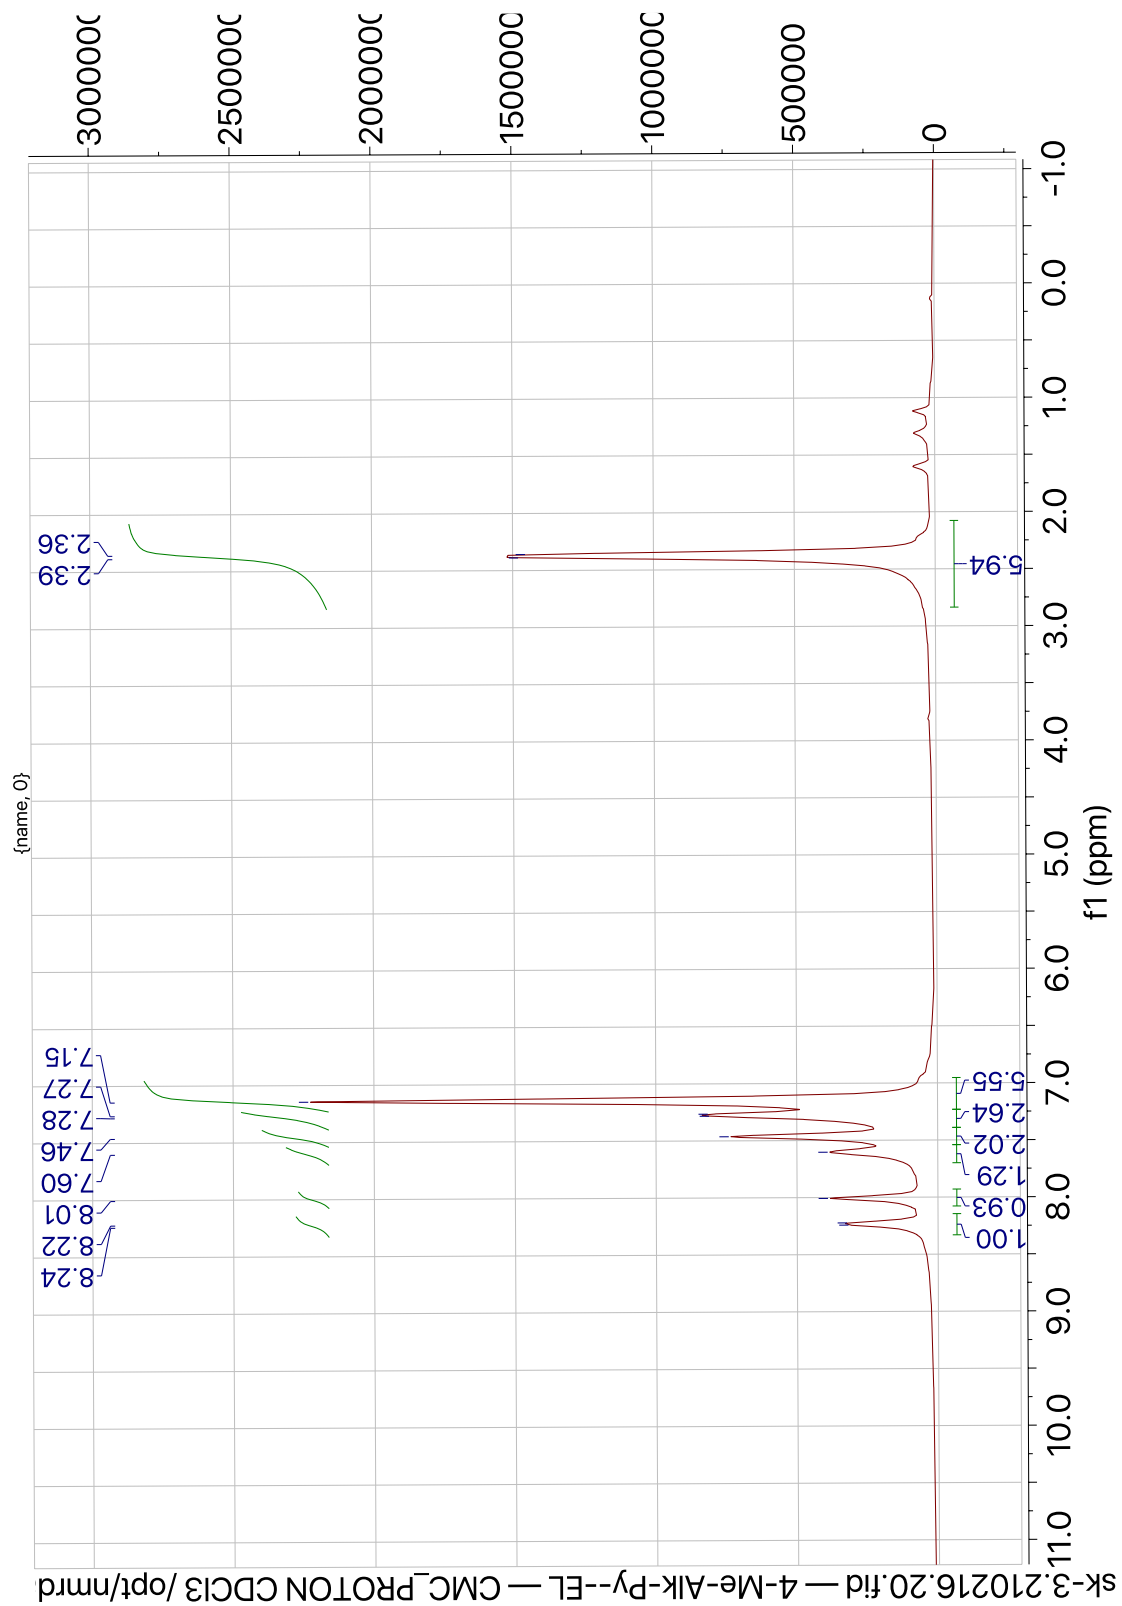

Compound 5a, <sup>13</sup>C NMR, CDCl<sub>3</sub>, 101 MHz

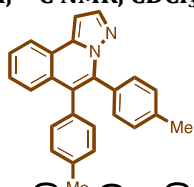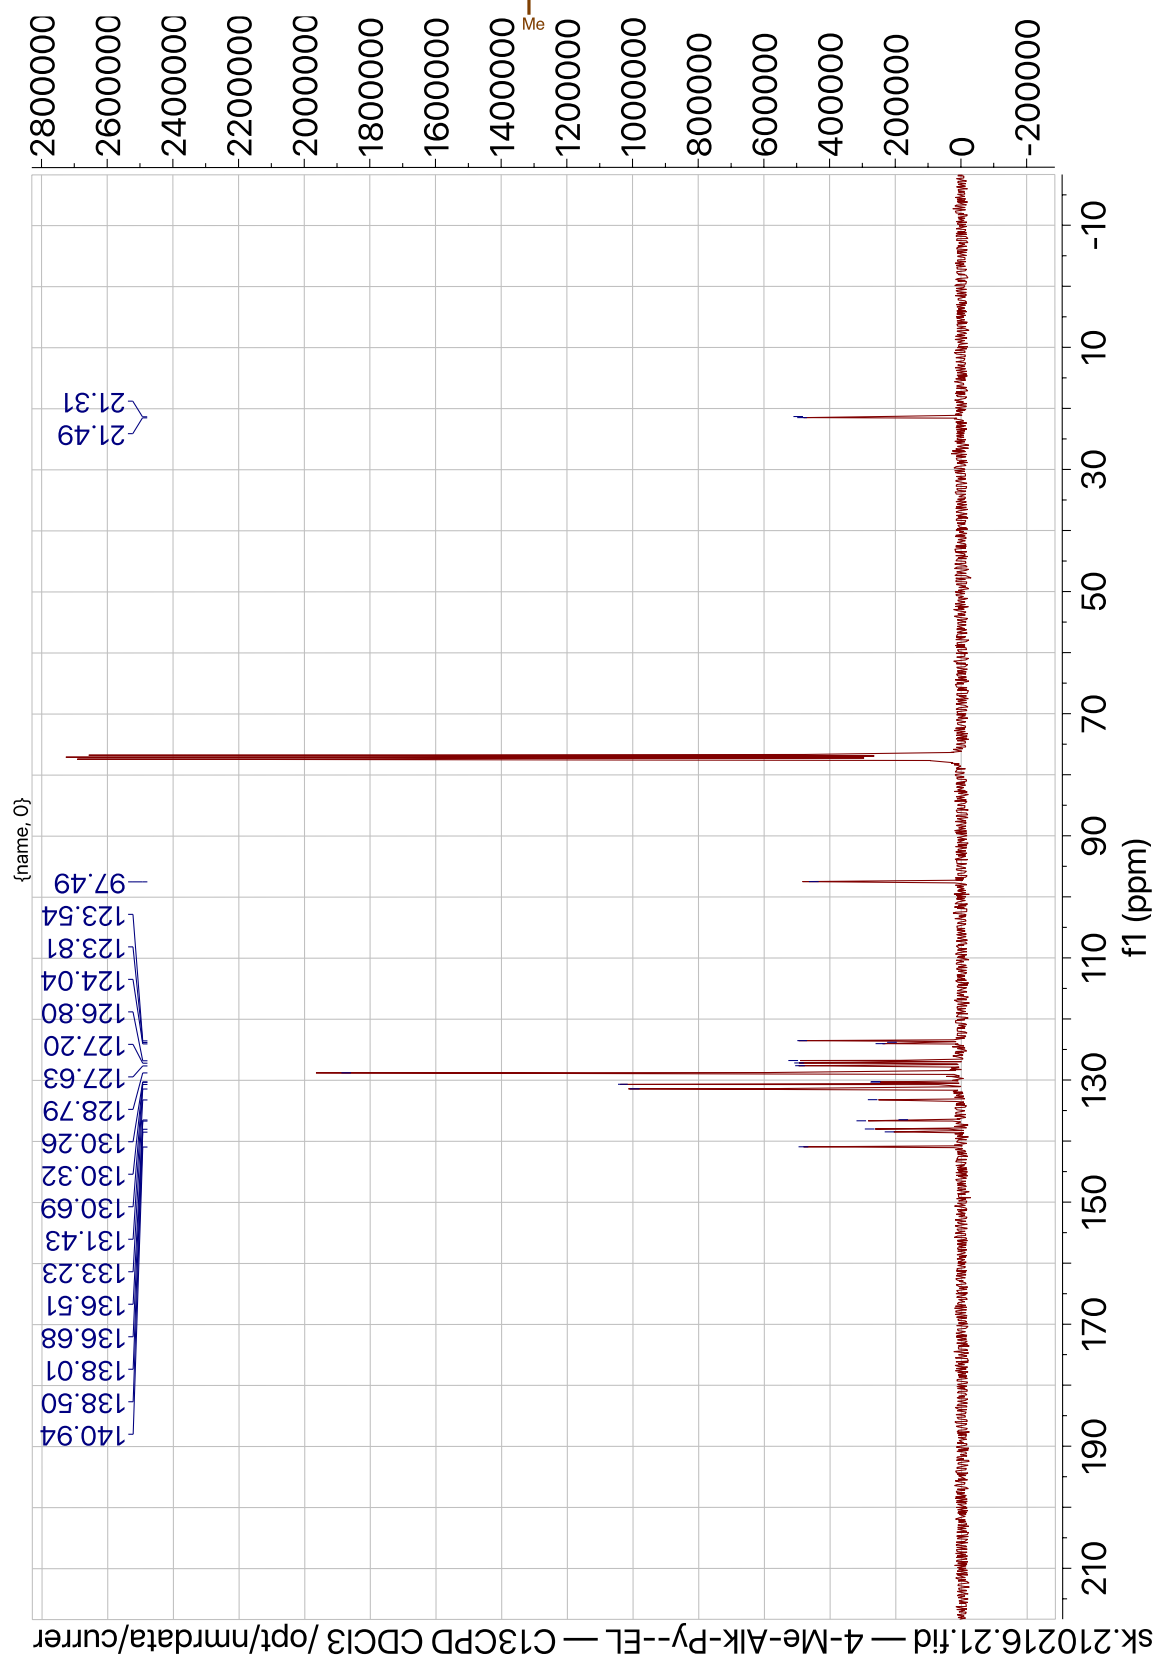

DCM-> MeOH (2% H2O + 0.1% FA)

210615\_HRMS\_IN\_KS\_4Me 65 (1.181) Cm (17:111)

1: TOF MS ES+  
2.53e7

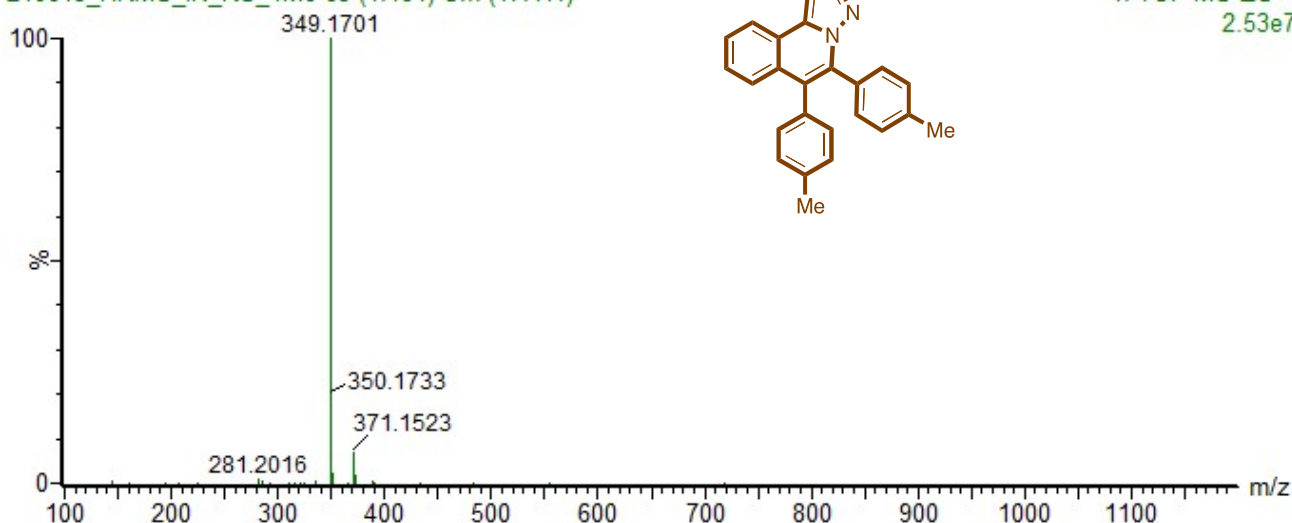

### Single Mass Analysis

Tolerance = 2.0 mDa / DBE: min = -1.5, max = 100.0

Element prediction: Off

Number of isotope peaks used for i-FIT = 3

Monoisotopic Mass, Even Electron Ions

216 formula(e) evaluated with 1 results within limits (all results (up to 1000) for each mass)

Elements Used:

C: 0-50

H: 0-100

N: 0-5

O: 0-3

Na: 0-1

| Mass     | Calc. Mass | mDa  | PPM  | DBE  | Formula    | i-FIT | i... | Fit Conf % | C  | H  | N | O | Na |
|----------|------------|------|------|------|------------|-------|------|------------|----|----|---|---|----|
| 349.1701 | 349.1705   | -0.4 | -1.1 | 16.5 | C25 H21 N2 | 41.5  | n... | n/a        | 25 | 21 | 2 |   |    |

DCM-> MeOH (2% H2O + 0.1% FA)

210615\_HRMS\_IN\_KS\_4Me 65 (1.181) Cm (17:111)

1: TOF MS ES+  
2.53e+007

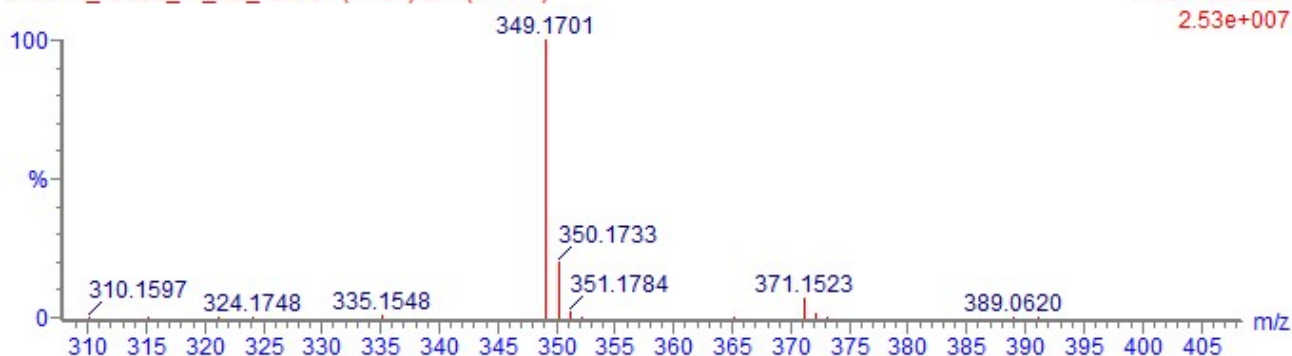

HRMS spectra of 5a



Compound 5b, <sup>13</sup>C NMR, CDCl<sub>3</sub>, 101 MHz

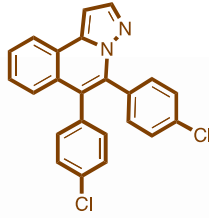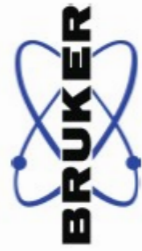

Current Data Parameters  
 NAME sk.210219  
 EXPNO 11  
 PROCNO 1

F2 - Acquisition Parameters  
 Date\_ 20210219  
 Time 15.43 h  
 INSTRUM Avance Neo Nanobay 400 MHz  
 PROBHD Z163739\_0067  
 PULPROG zgpg30  
 TD 65536  
 SOLVENT CDCl3  
 NS 1024  
 DS 4  
 SWH 23809.573 Hz  
 FIDRES 0.16666 Hz  
 AQ 1.3762560 sec  
 RG 101  
 DW 21.000 usec  
 DE 6.50 usec  
 TE 298.0 K  
 D1 2.00000000 sec  
 D11 0.03000000 sec  
 TDO 1  
 SF01 100.6228298 MHz  
 NUC1 13C  
 P1 12.00 usec  
 PL1 0.00 usec  
 P1M1 61.27700043 W  
 SF02 400.1316005 MHz  
 NUC2 1H  
 CPOPRG12 maltz65  
 PCPD2 90.00 usec  
 P1M2 14.63000011 W  
 P1M12 0.16232000 W  
 P1M13 0.08164700 W

F2 - Processing parameters  
 SI 32768  
 SF 100.6127685 MHz  
 WDW EM  
 SSB 0  
 LB 1.00 Hz  
 GB 0  
 PC 1.40

PY-4-ClRA-Alk-EL  
 C13CPD CDCl3 /opt/nmrdata/current\_data\_sk\_6

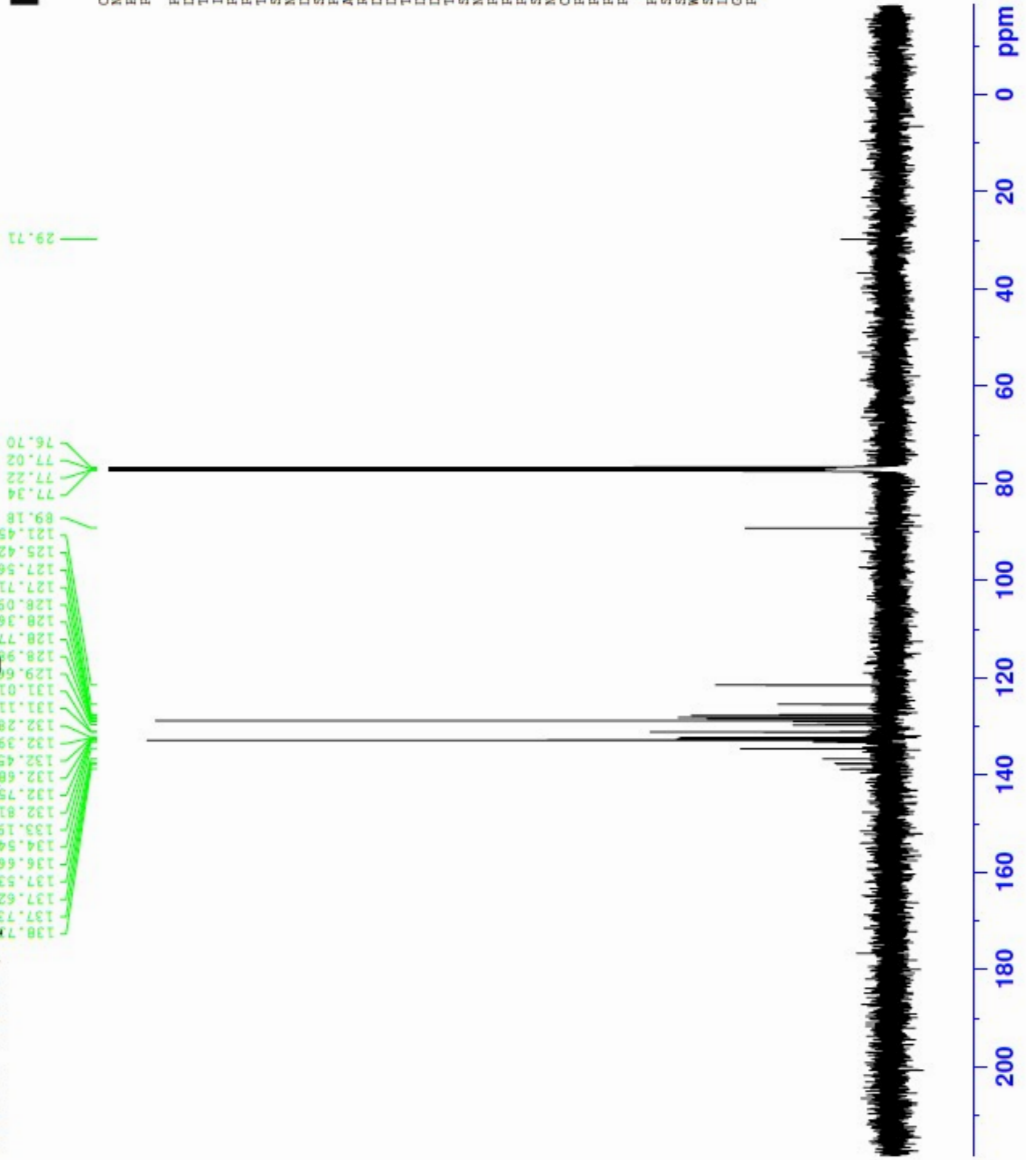



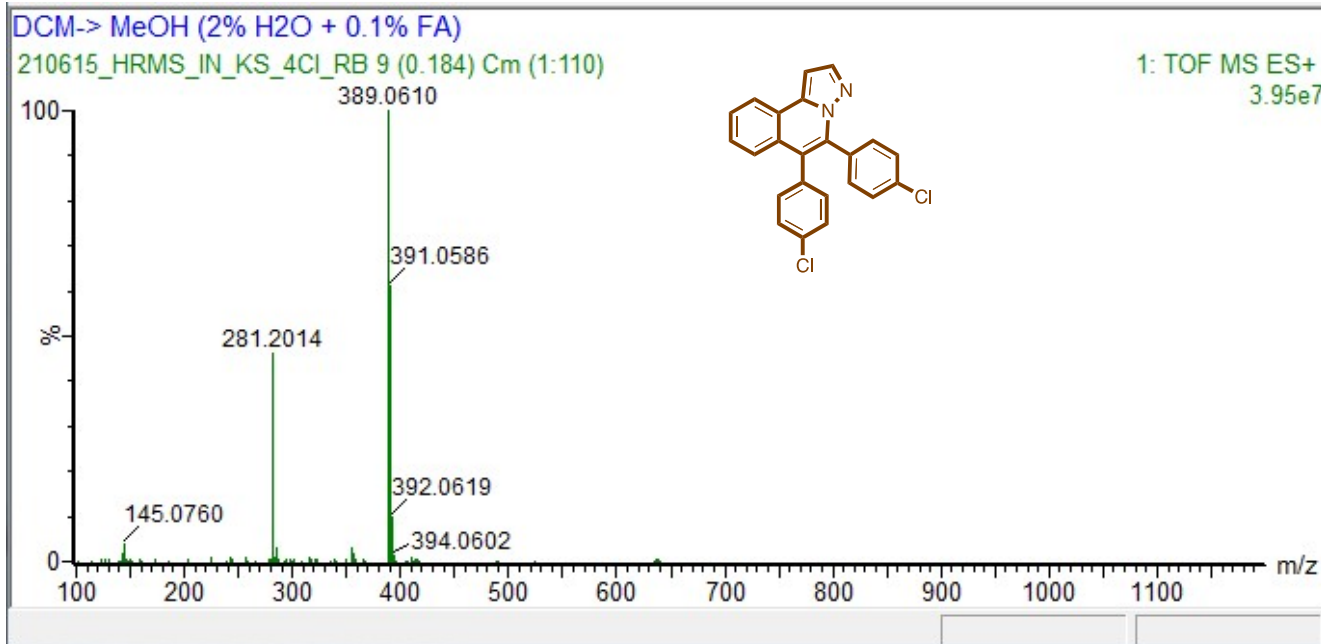

### Single Mass Analysis

Tolerance = 2.0 mDa / DBE: min = -1.5, max = 100.0

Element prediction: Off

Number of isotope peaks used for i-FIT = 3

Monoisotopic Mass, Even Electron Ions

644 formula(e) evaluated with 3 results within limits (all results (up to 1000) for each mass)

Elements Used:

C: 0-50      H: 0-100      N: 0-5      O: 0-3      Na: 0-1      Cl: 0-2

| Mass     | Calc. Mass | mDa  | PPM  | DBE  | Formula        | i-... | Fit Conf % | C  | H  | N | O | Na | Cl |
|----------|------------|------|------|------|----------------|-------|------------|----|----|---|---|----|----|
| 389.0610 | 389.0612   | -0.2 | -0.5 | 16.5 | C23 H15 N2 Cl2 | 0...  | 99.81      | 23 | 15 | 2 |   |    | 2  |
|          | 389.0603   | 0.7  | 1.8  | 25.5 | C29 H9 O2      | 1...  | 0.00       | 29 | 9  |   | 2 |    |    |
|          | 389.0594   | 1.6  | 4.1  | 21.5 | C24 H10 N4 Cl  | 6...  | 0.19       | 24 | 10 | 4 |   |    | 1  |

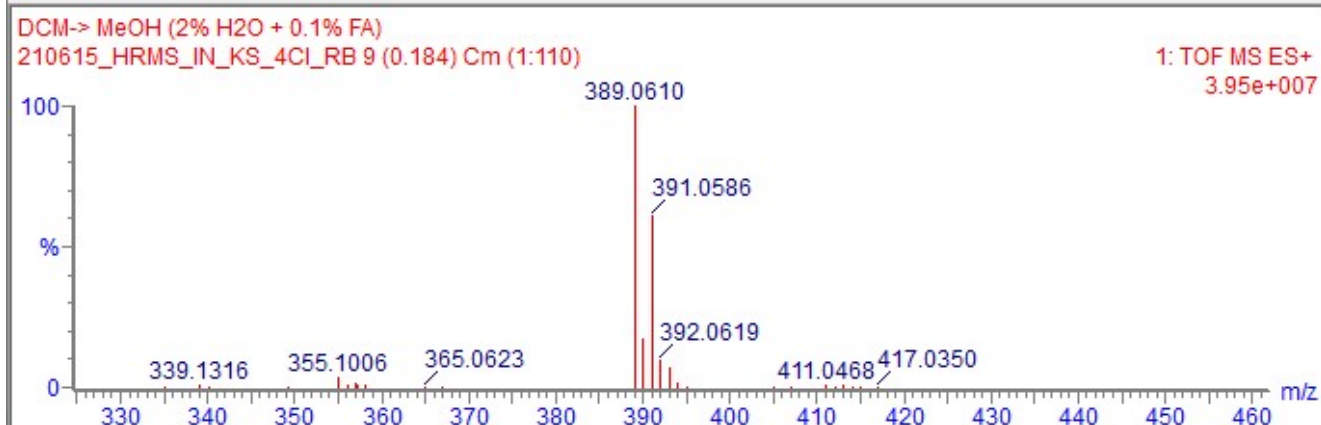

HRMS spectra of **5b**

Compound 5c, <sup>1</sup>H NMR, CDCl<sub>3</sub>, 400 MHz

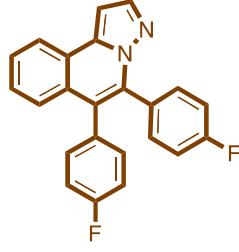

{name, 0}

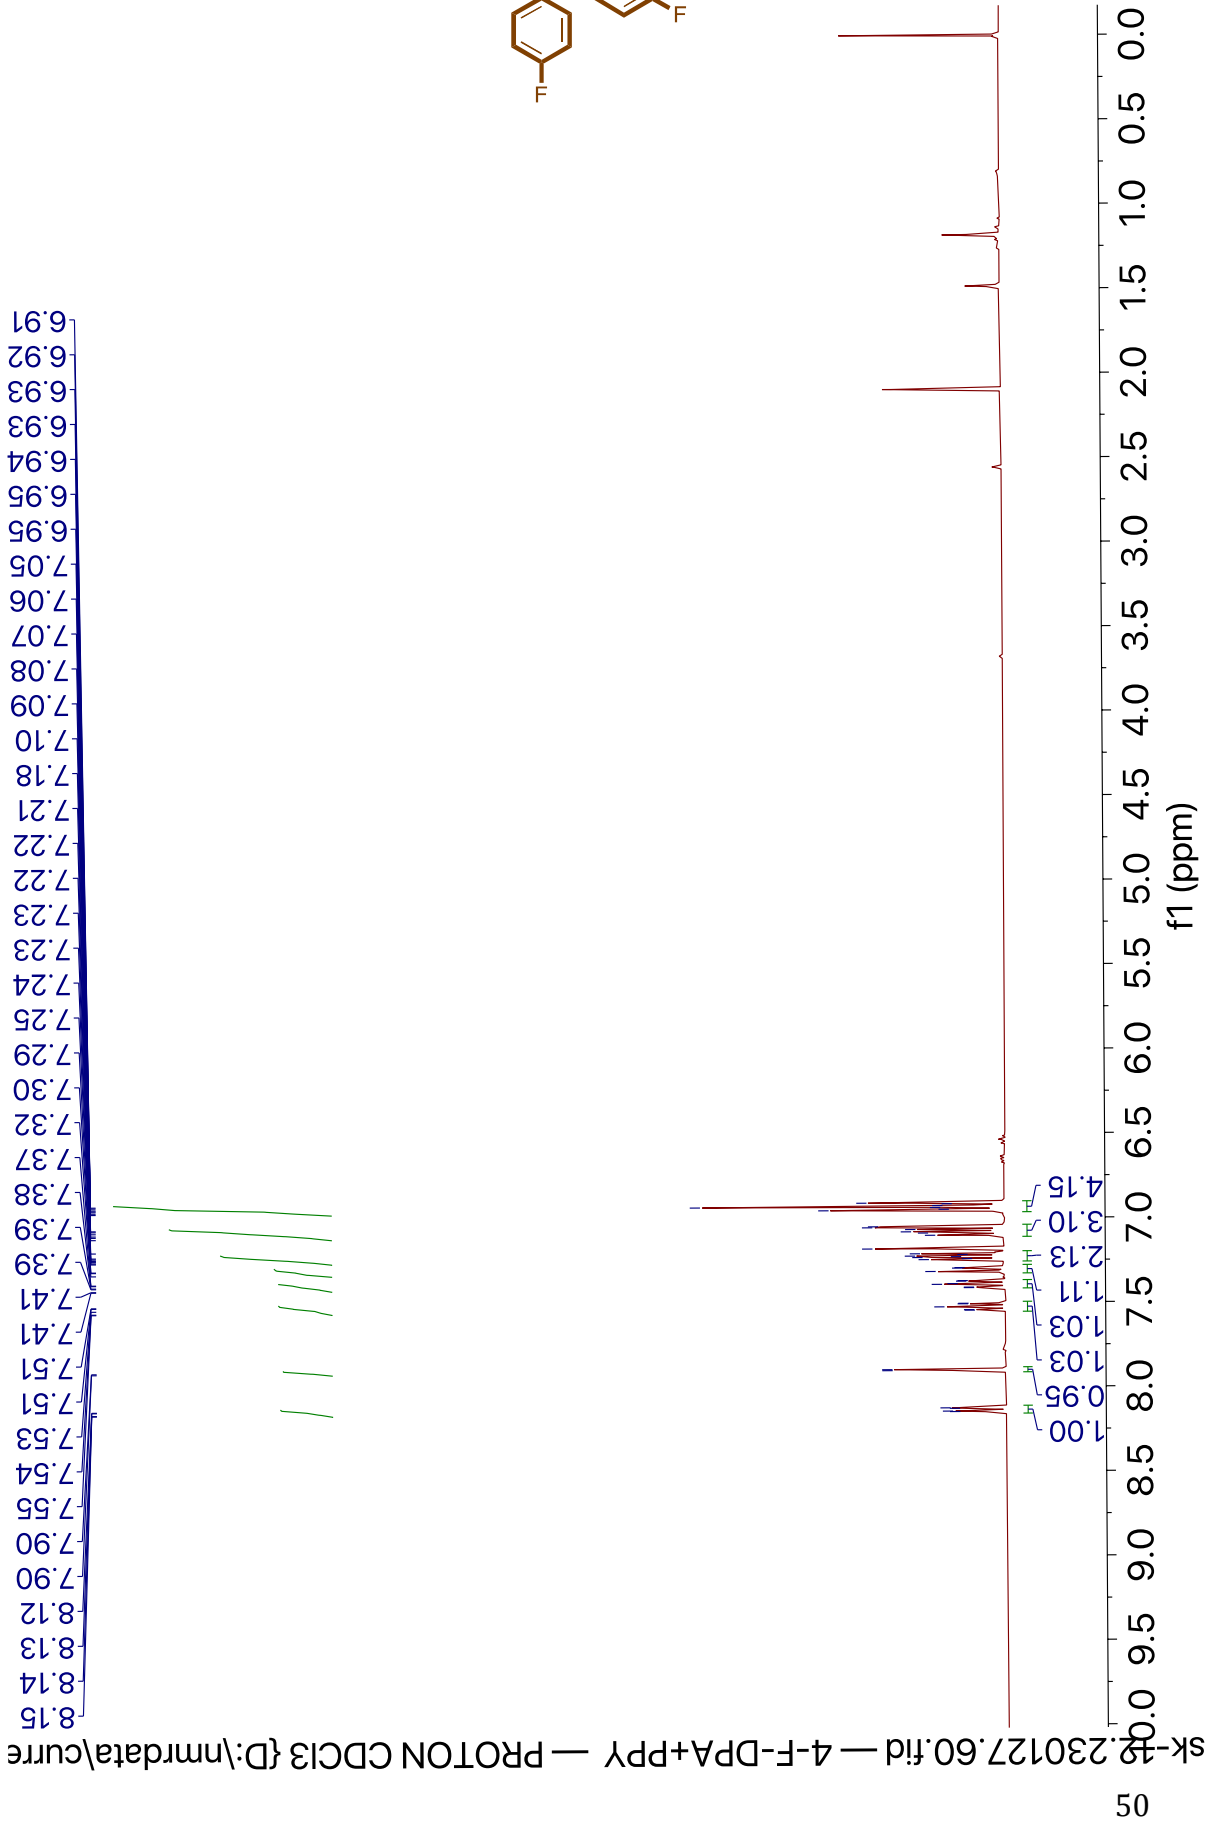

Compound 5c, <sup>13</sup>C NMR, CDCl<sub>3</sub>, 101 MHz

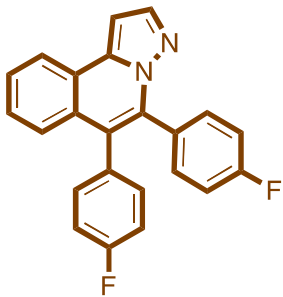

{name, 0}

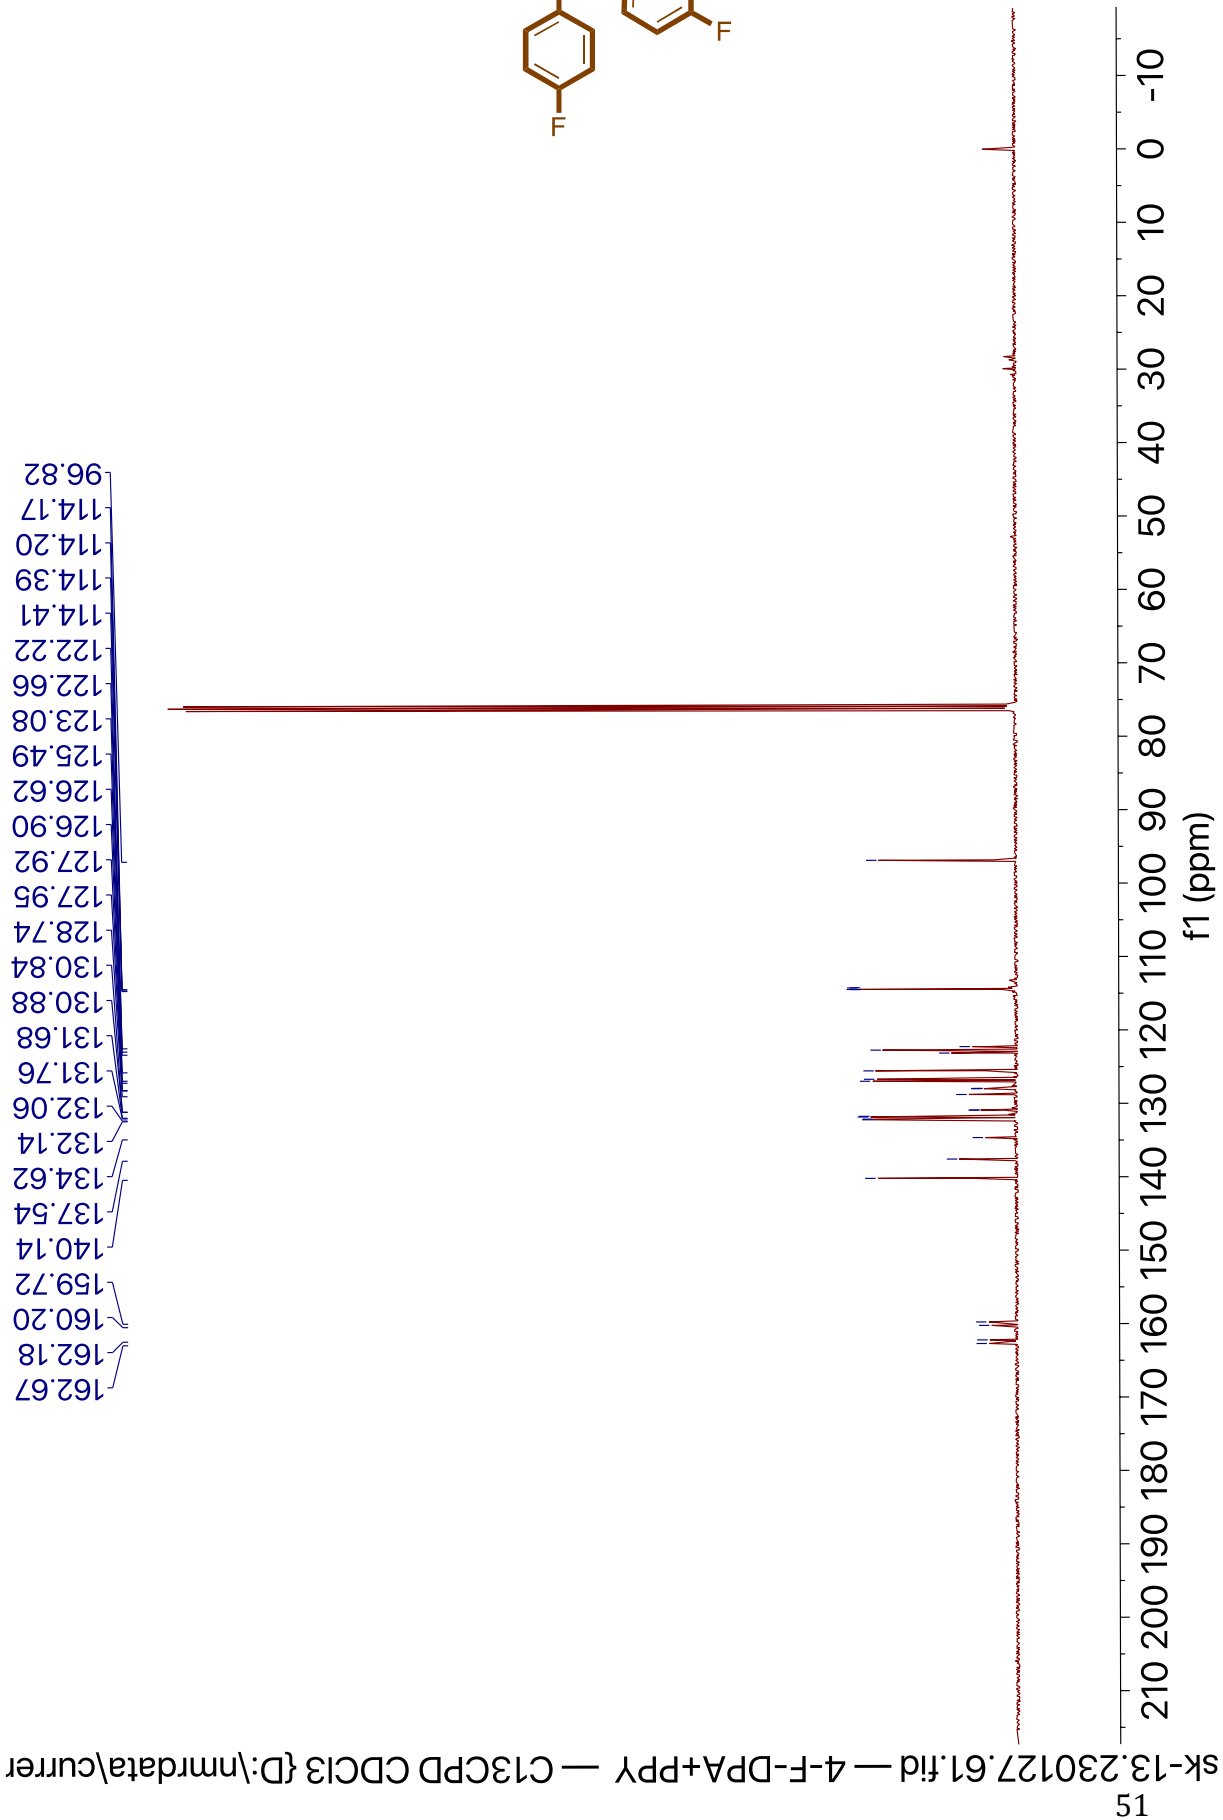

Compound 5c, <sup>13</sup>C NMR, CDCl<sub>3</sub>, 101 MHz

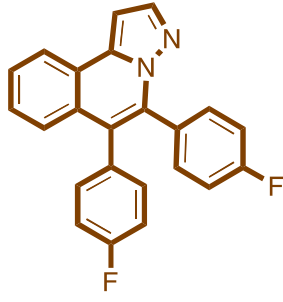

{name, 0}

114.35  
114.34  
114.33  
114.31  
114.30  
114.29  
112.36  
112.35  
112.34  
112.33  
112.33  
112.31  
112.30  
112.29

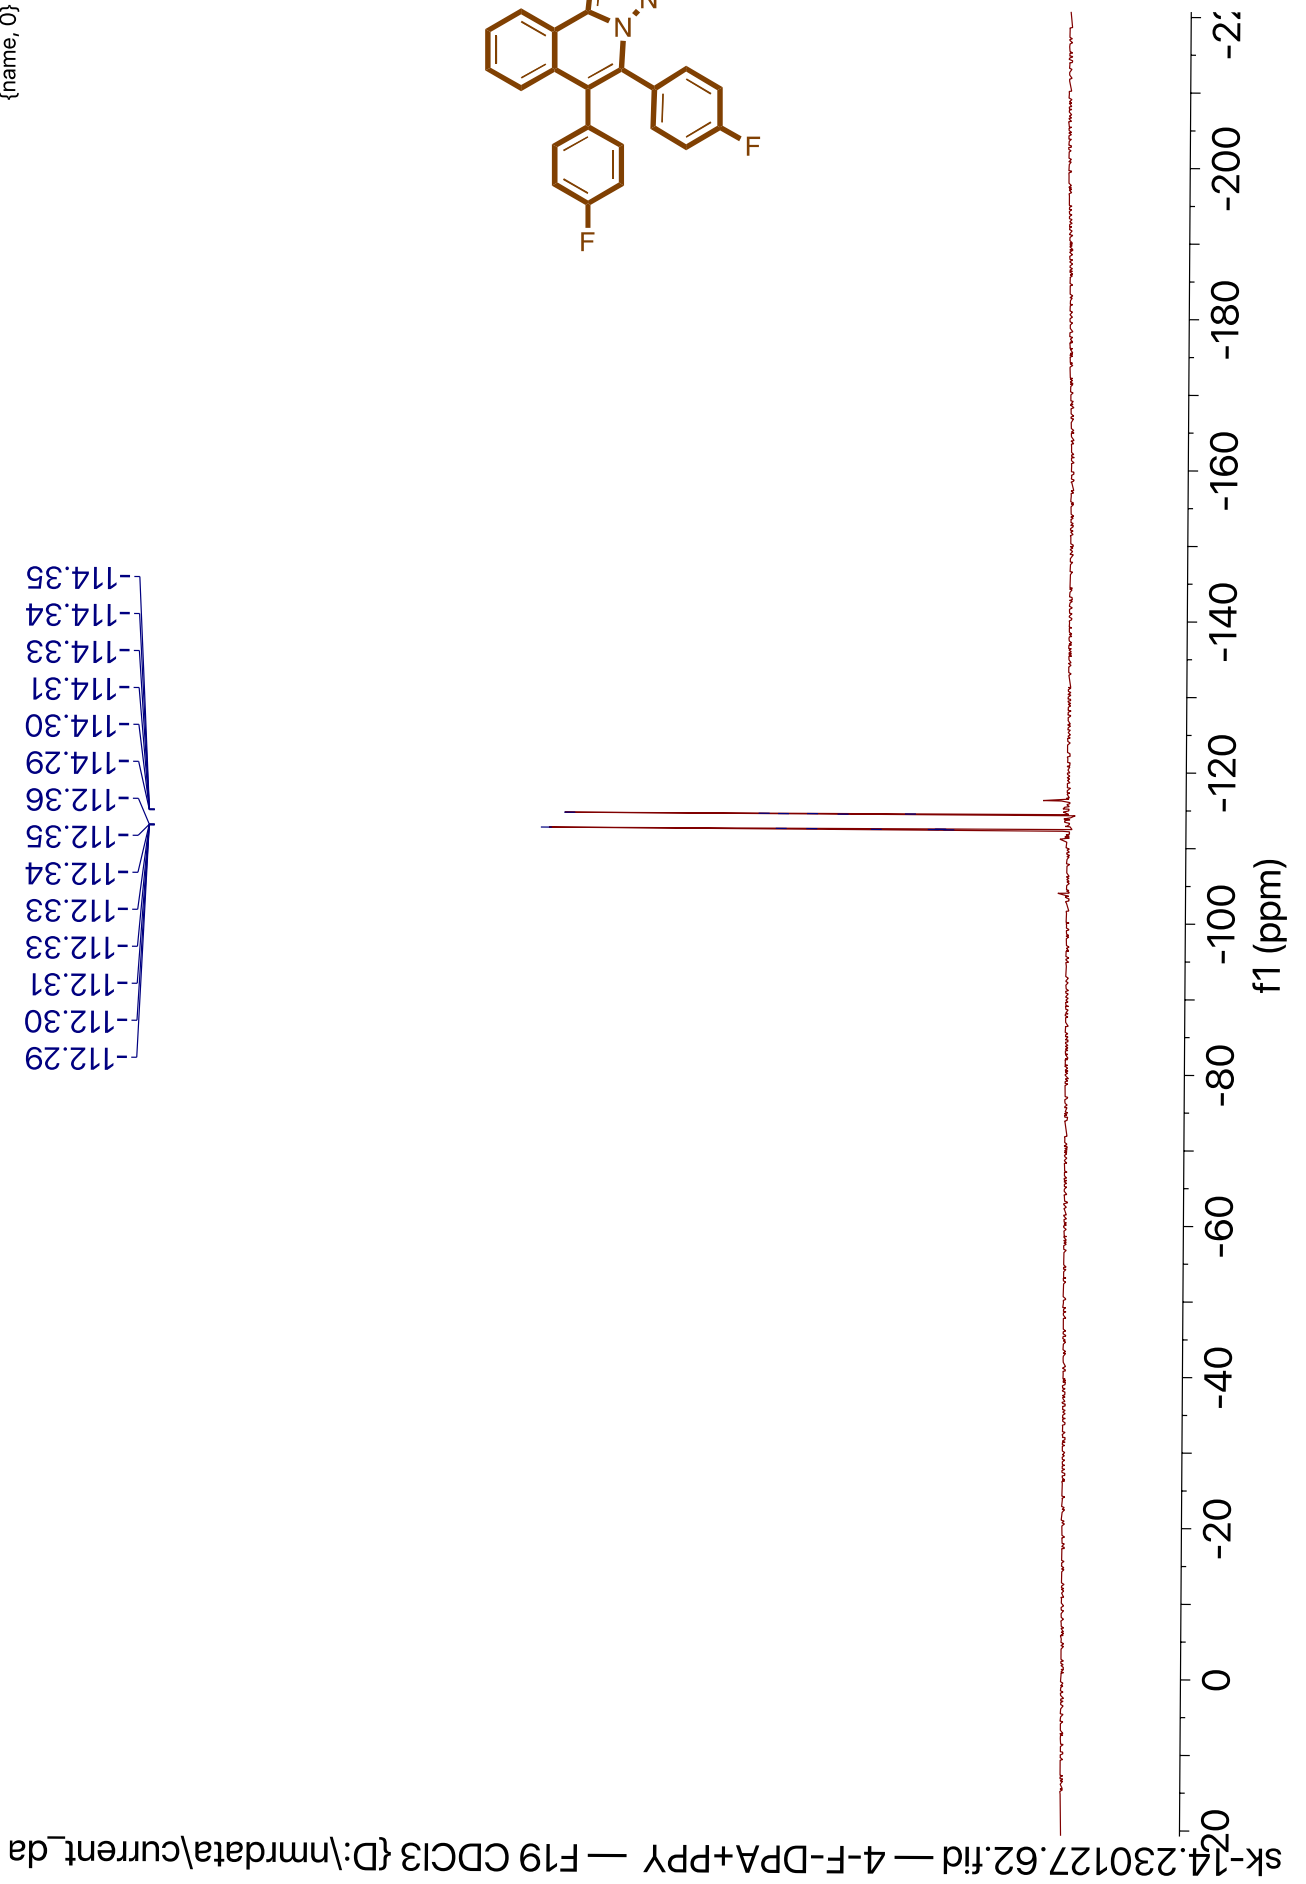

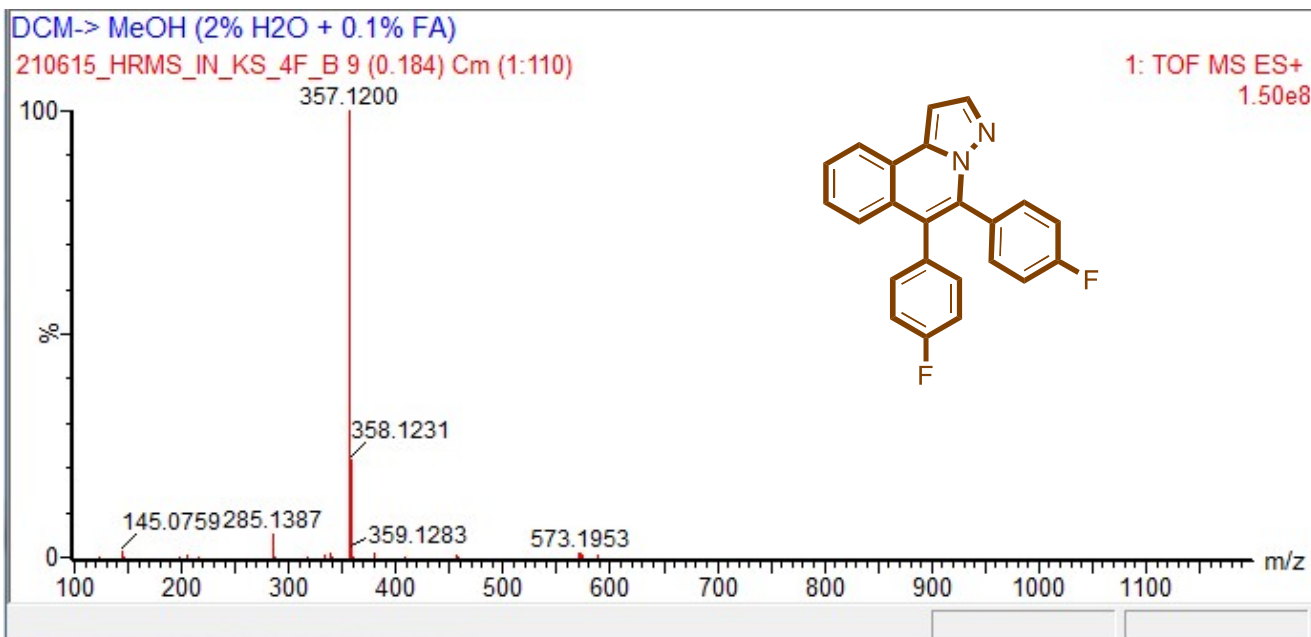

### Single Mass Analysis

Tolerance = 2.0 mDa / DBE: min = -1.5, max = 100.0

Element prediction: Off

Number of isotope peaks used for i-FIT = 3

Monoisotopic Mass, Even Electron Ions

615 formula(e) evaluated with 2 results within limits (all results (up to 1000) for each mass)

Elements Used:

C: 0-50      H: 0-100      N: 0-5      O: 0-3      F: 0-2      Na: 0-1

| Mass     | Calc. Mass | mDa  | PPM  | DBE  | Formula          | i-Fl... | Fit Conf % | C  | H  | N | O | F | Na |
|----------|------------|------|------|------|------------------|---------|------------|----|----|---|---|---|----|
| 357.1200 | 357.1203   | -0.3 | -0.8 | 16.5 | C23 H15 N2 F2    | 40....  | 43.00      | 23 | 15 | 2 |   | 2 |    |
|          | 357.1215   | -1.5 | -4.2 | 12.5 | C20 H18 N2 O3 Na | 40....  | 57.00      | 20 | 18 | 2 | 3 |   | 1  |

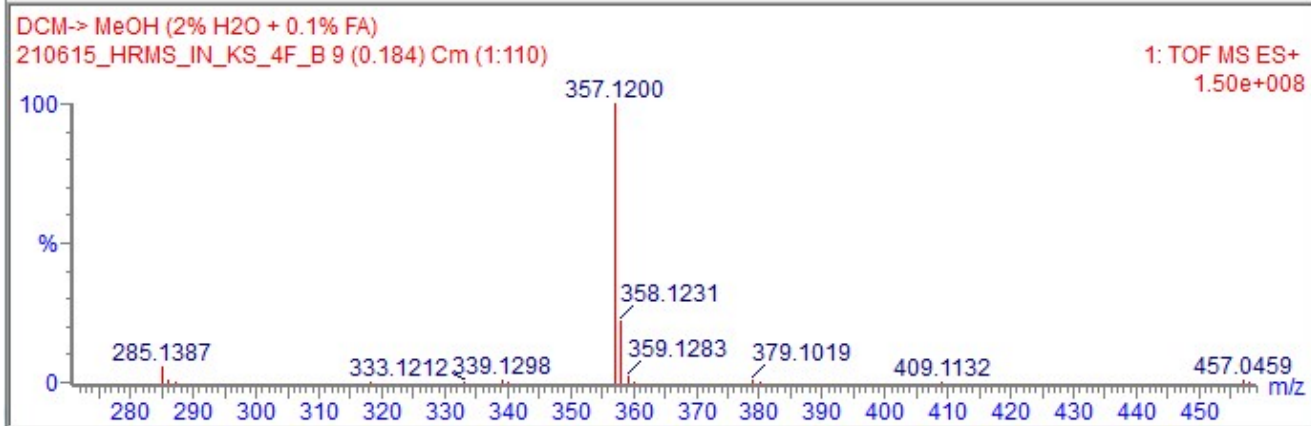

HRMS spectra of 5c



sk.210216.11.fid — 4-Br-AIK-Py-EL — C13CPD CDCl3 /opt/nmrdata/current/

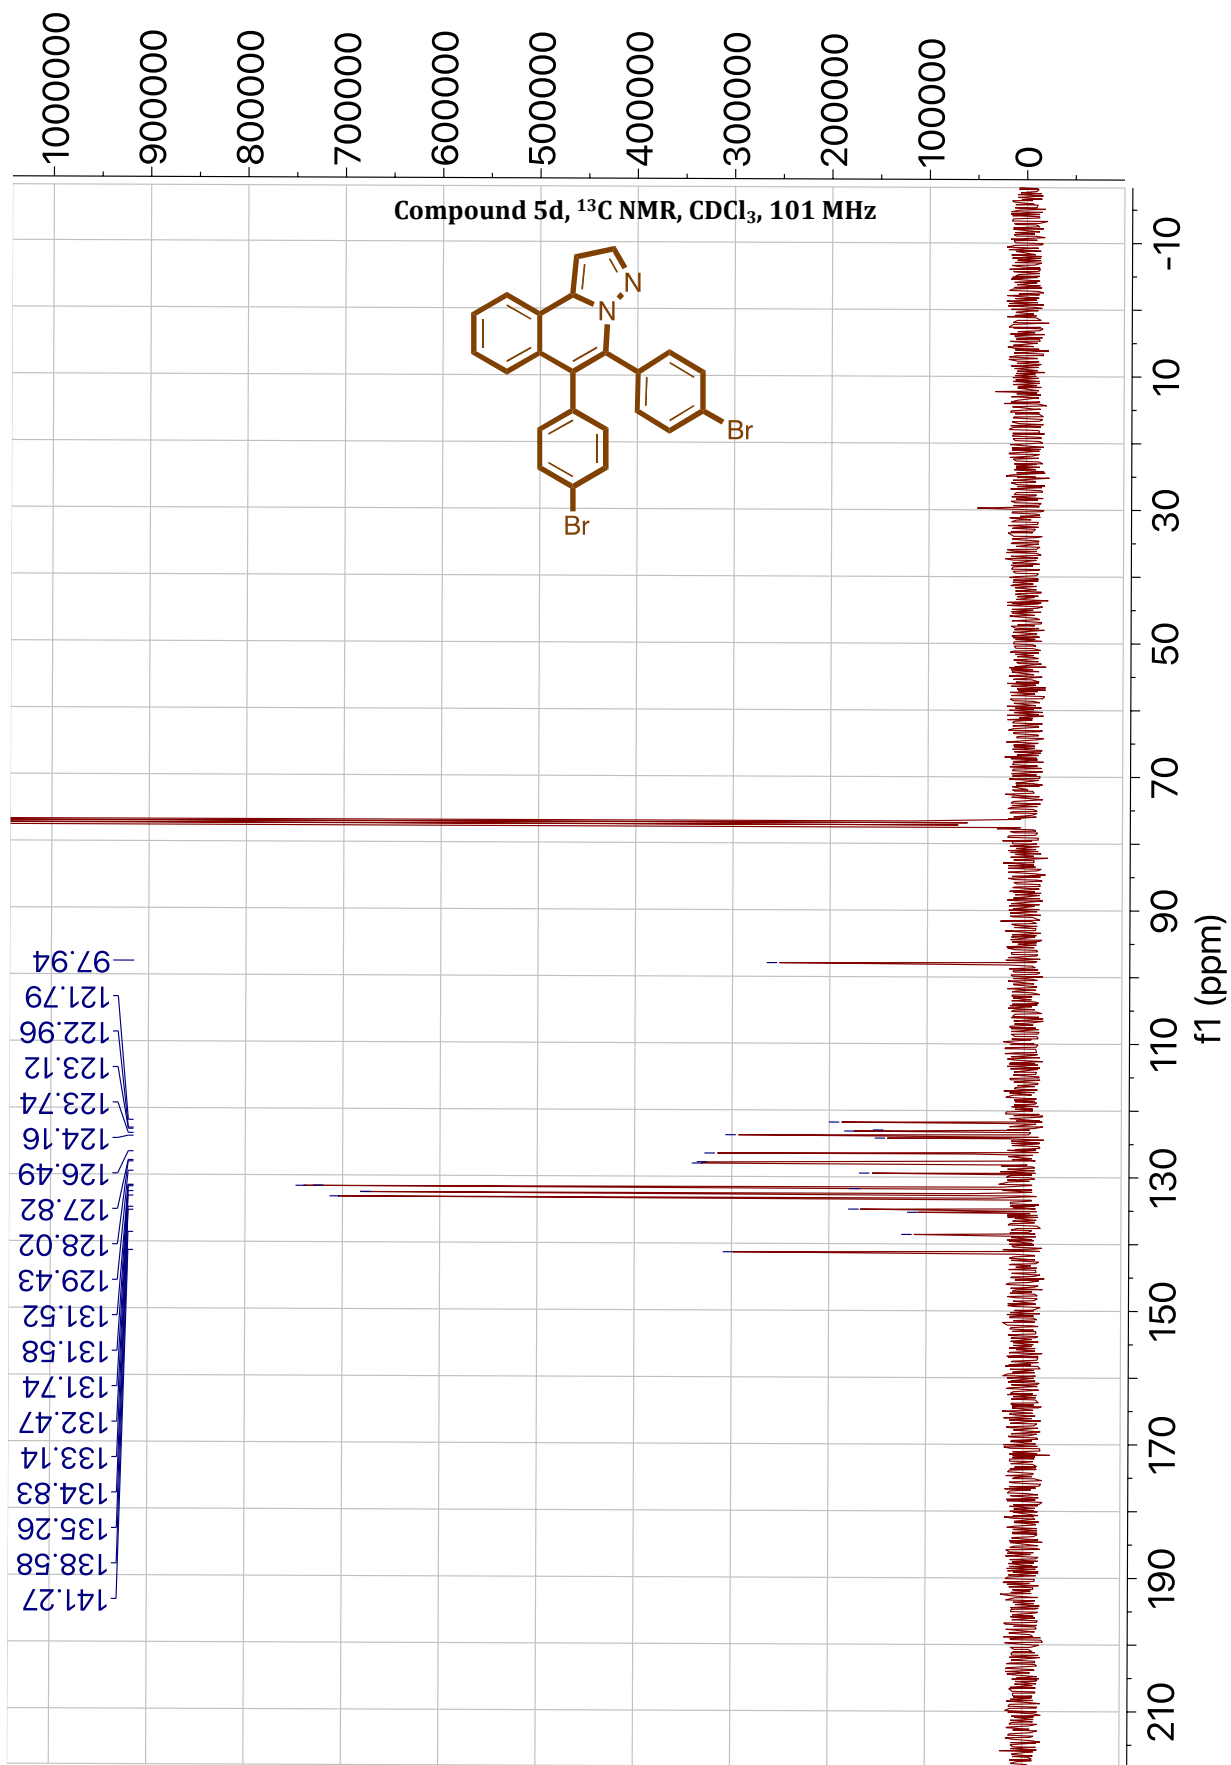



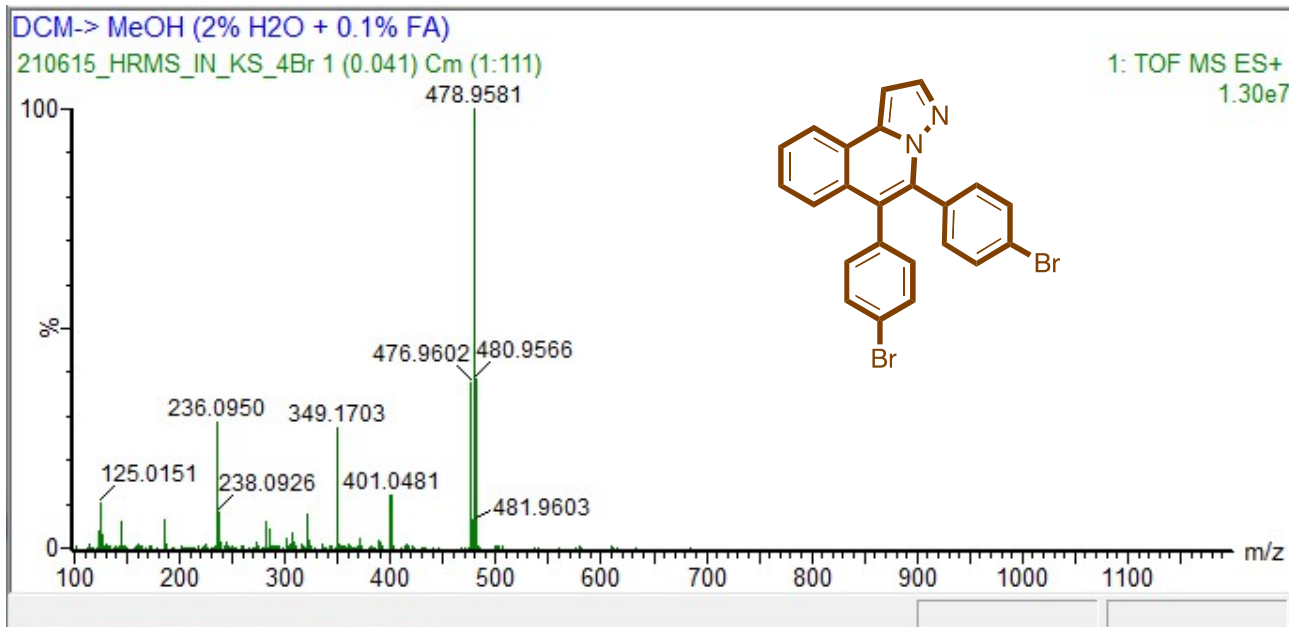

### Single Mass Analysis

Tolerance = 2.0 mDa / DBE: min = -1.5, max = 100.0

Element prediction: Off

Number of isotope peaks used for i-FIT = 3

Monoisotopic Mass, Even Electron Ions

719 formula(e) evaluated with 2 results within limits (all results (up to 1000) for each mass)

Elements Used:

C: 0-50      H: 0-100      N: 0-5      O: 0-3      Na: 0-1      Br: 0-2

| Mass     | Calc. Mass | mDa | PPM | DBE  | Formula            | i...  | Fit Conf % | C  | H  | N | O | Na | Br |
|----------|------------|-----|-----|------|--------------------|-------|------------|----|----|---|---|----|----|
| 476.9602 | 476.9602   | 0.0 | 0.0 | 16.5 | C23 H15 N2 Br2     | 50... | 98.95      | 23 | 15 | 2 |   |    | 2  |
|          | 476.9599   | 0.3 | 0.6 | 20.5 | C22 H7 N4 O3 Na Br | 64... | 1.05       | 22 | 7  | 4 | 3 | 1  | 1  |

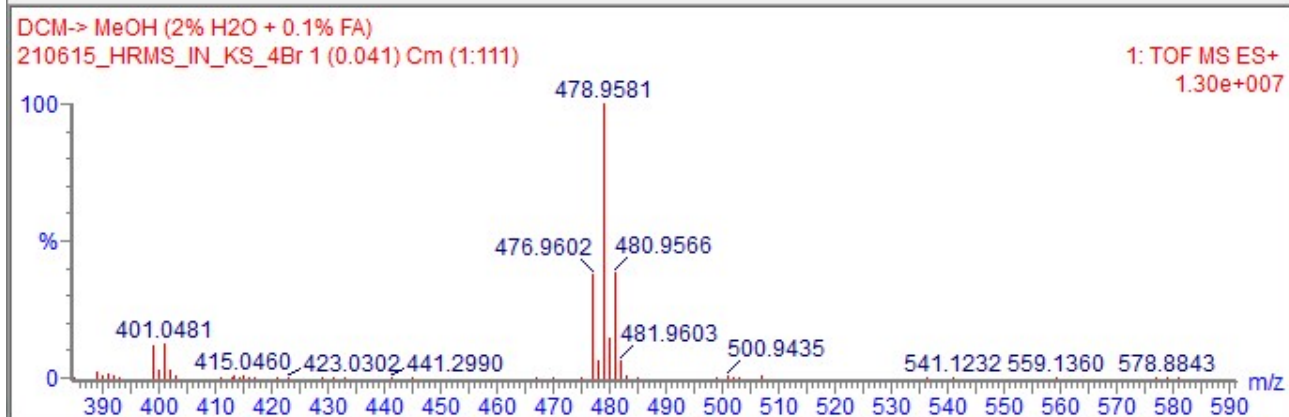

HRMS spectra of **5d**



Compound 5e, <sup>1</sup>H NMR, CDCl<sub>3</sub>, 400 MHz

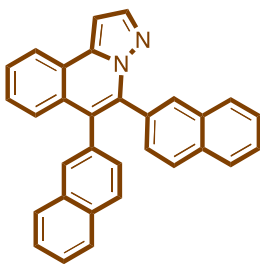

{name, 0}

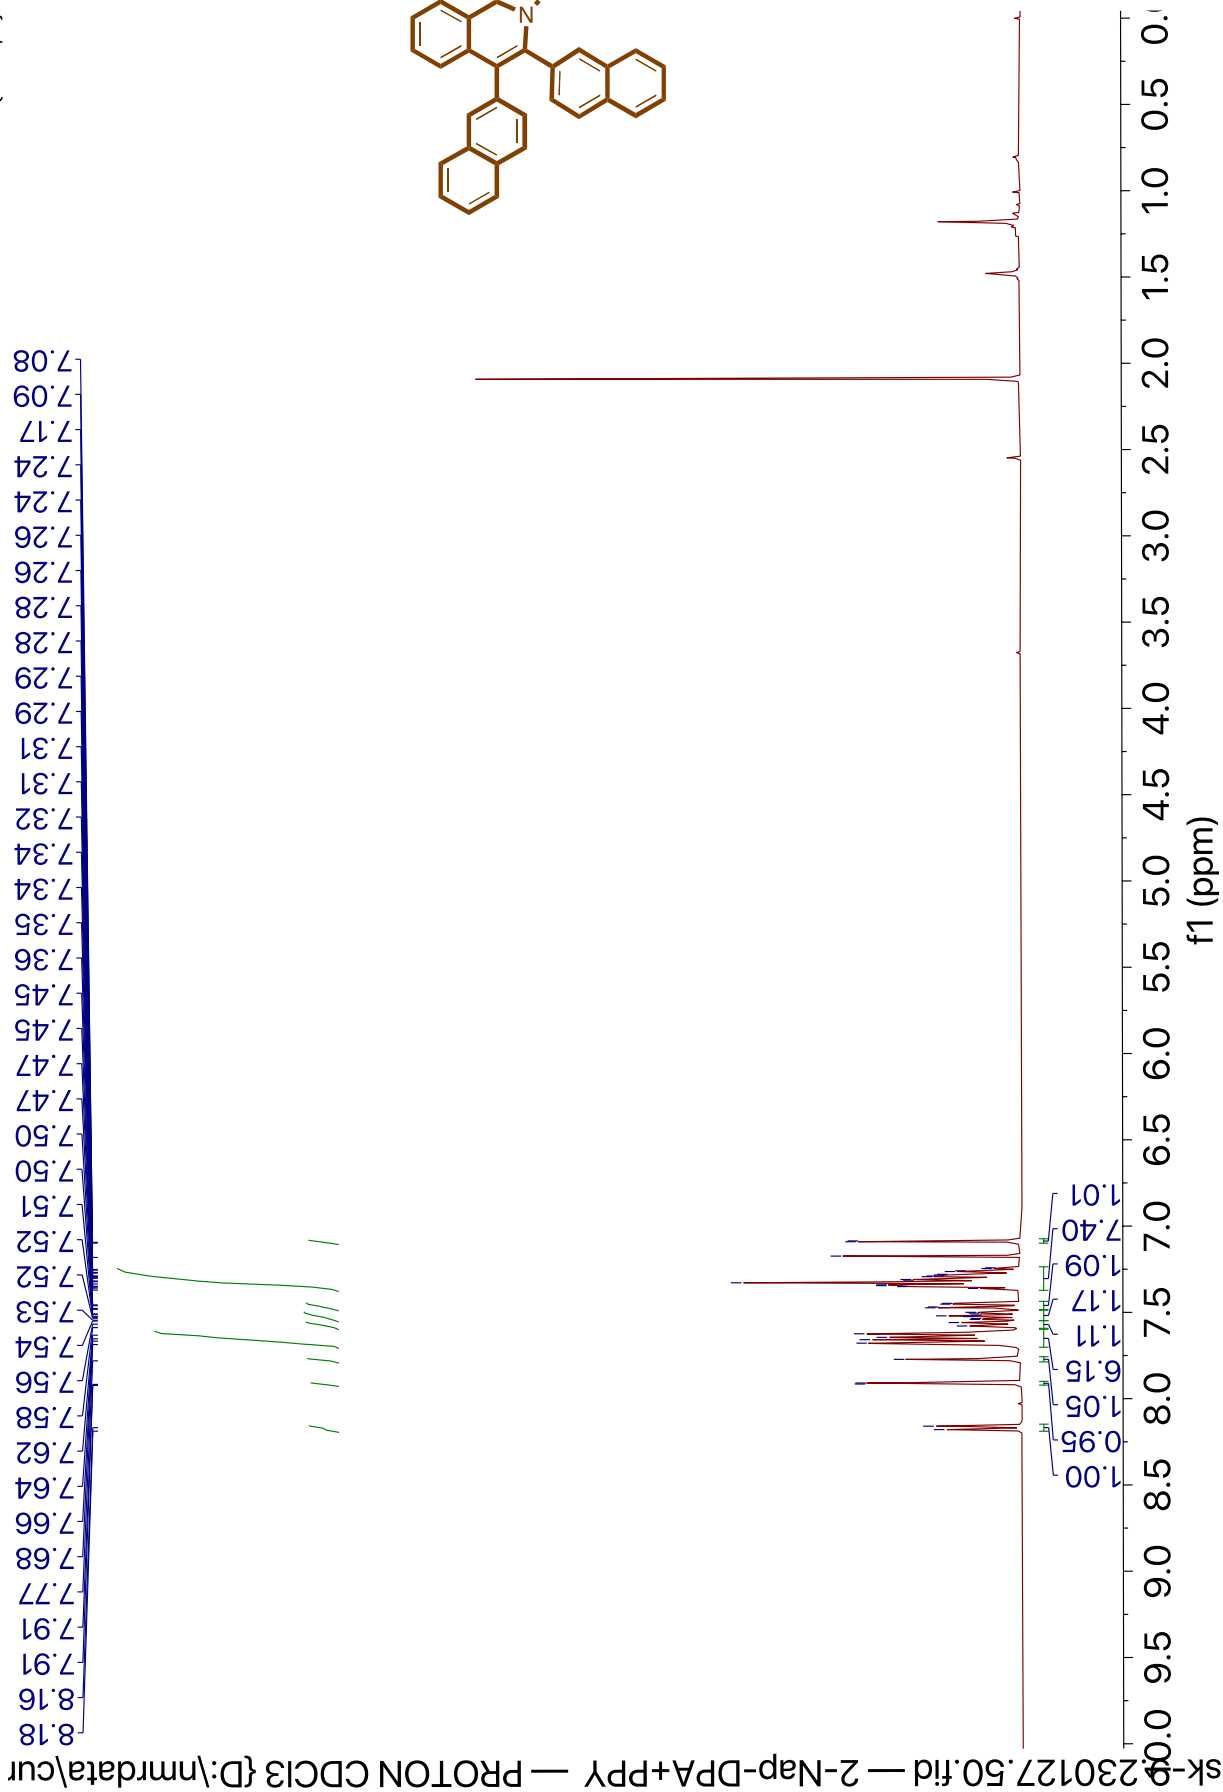

sk-9-230127.50.fid - 2-Nap-DPA+PPY - PROTON CDCl3 {D:\nmrdata\cur

Compound 5e, <sup>13</sup>C NMR, CDCl<sub>3</sub>, 101 MHz

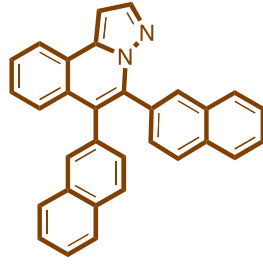

{name, 0}

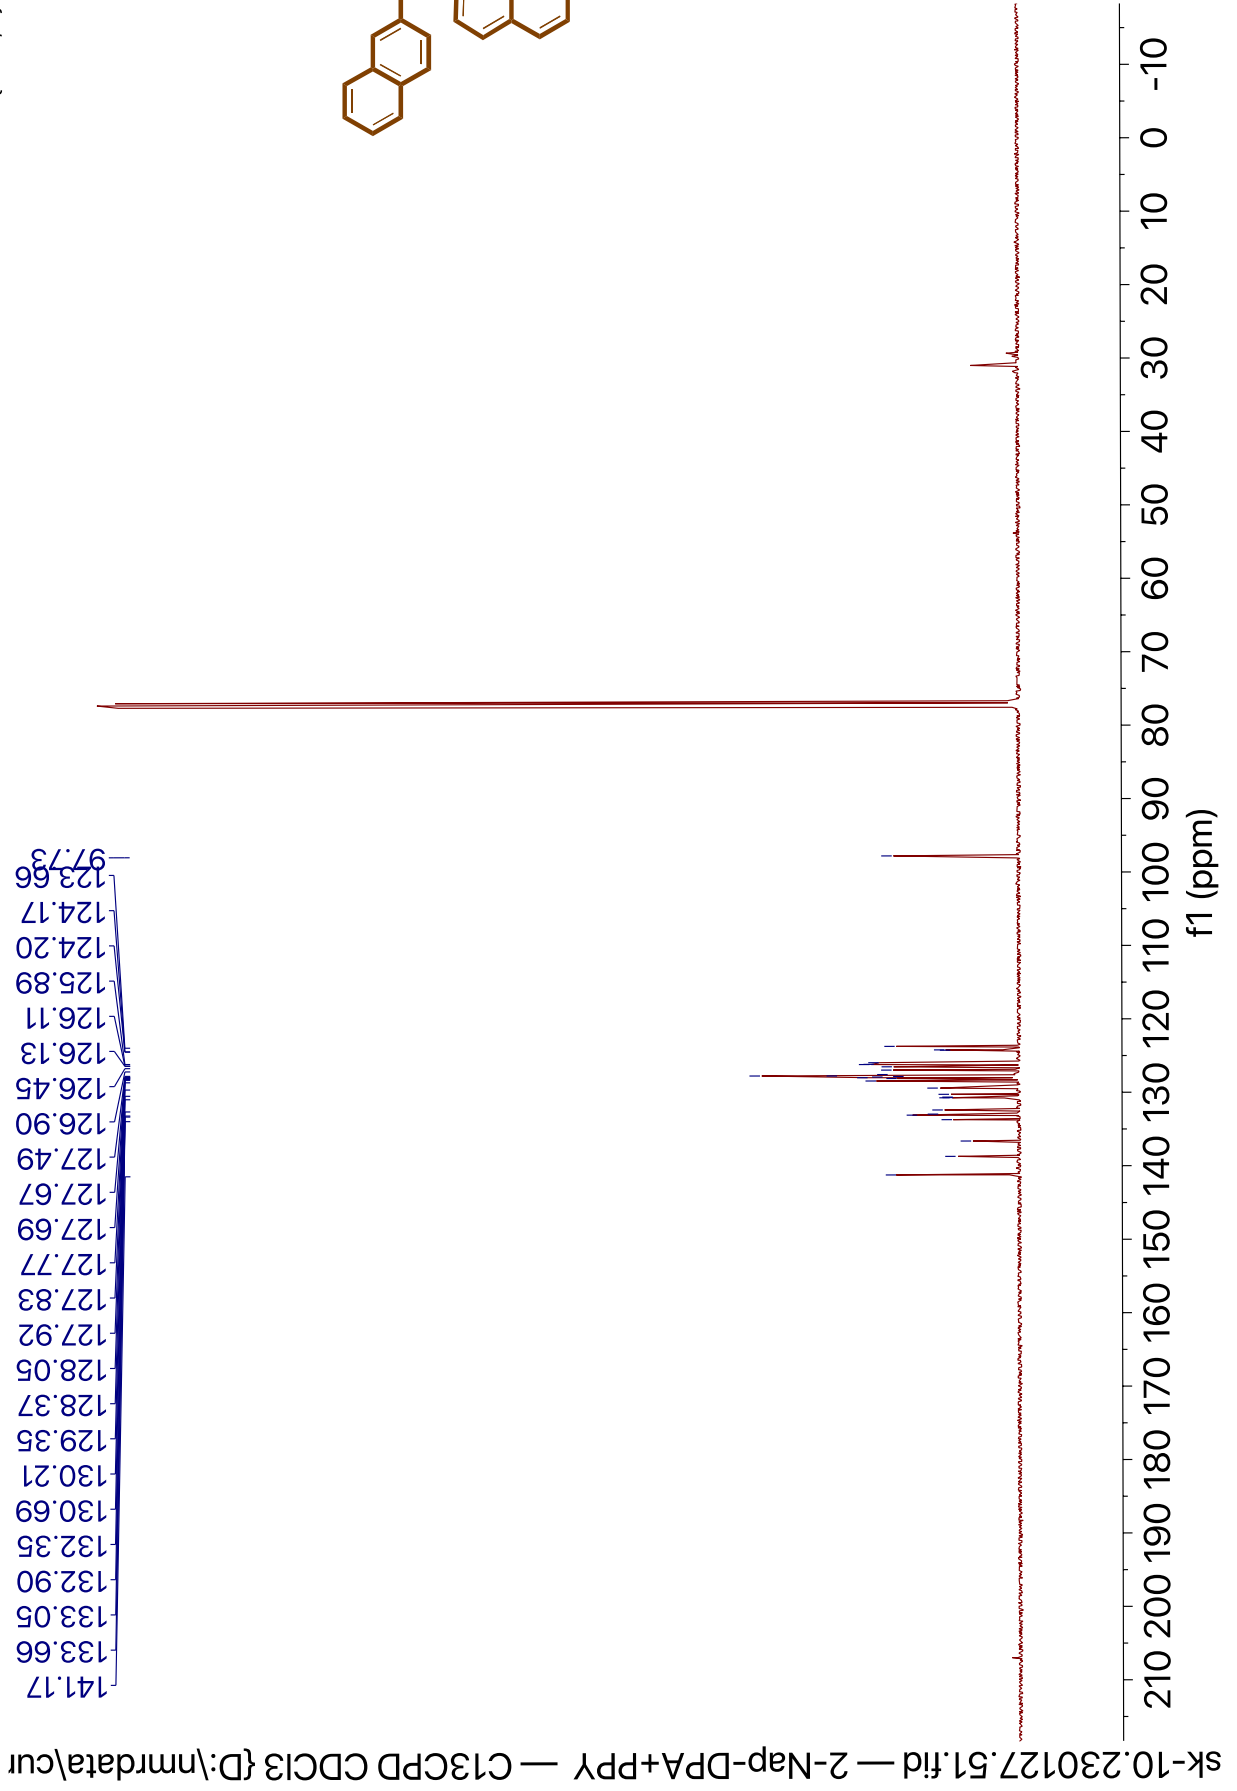

sk-10.230127.51.fid - 2-Nap-DPA+PY - C13CPD CDCl3 {D:\nmrdata\cur

DCM-> MeOH (2% H2O + 0.1% FA)

210615\_HRMS\_IN\_KS\_2Nap 1 (0.041) Cm (1:110)

1: TOF MS ES+  
2.68e7

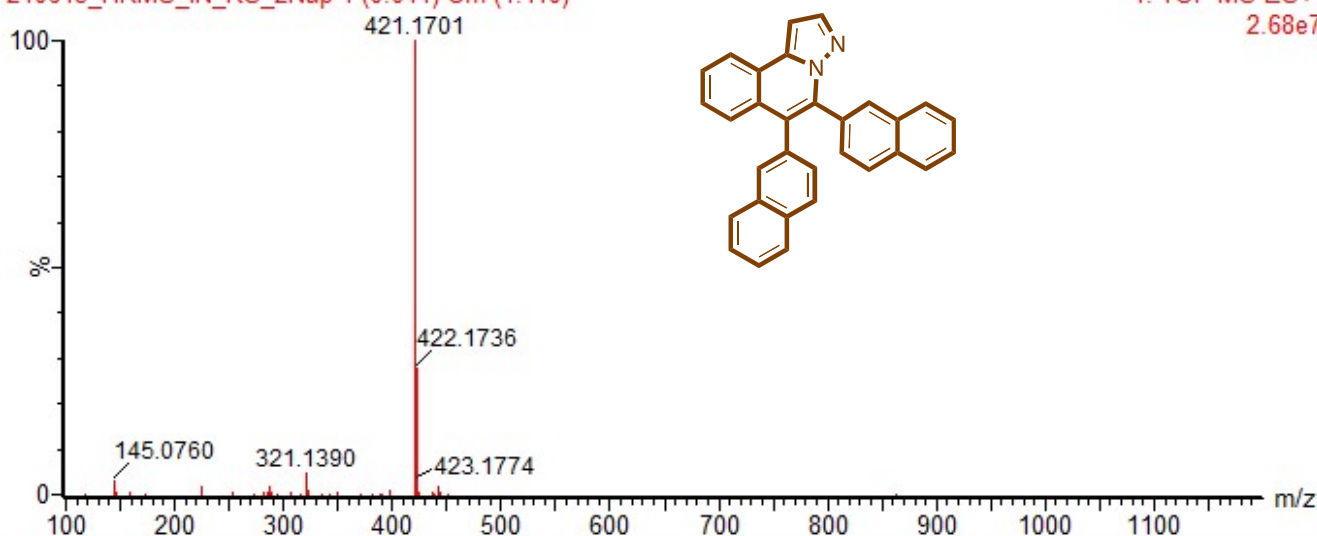

### Single Mass Analysis

Tolerance = 2.0 mDa / DBE: min = -1.5, max = 100.0

Element prediction: Off

Number of isotope peaks used for i-FIT = 3

Monoisotopic Mass, Even Electron Ions

256 formula(e) evaluated with 1 results within limits (all results (up to 1000) for each mass)

Elements Used:

C: 0-50

H: 0-100

N: 0-5

O: 0-3

Na: 0-1

| Mass     | Calc. Mass | mDa  | PPM  | DBE  | Formula    | i-FIT | i-FIT Norm | Fit Conf % | C  | H  | N | O | Na |
|----------|------------|------|------|------|------------|-------|------------|------------|----|----|---|---|----|
| 421.1701 | 421.1705   | -0.4 | -0.9 | 22.5 | C31 H21 N2 | 38.1  | n/a        | n/a        | 31 | 21 | 2 |   |    |

DCM-> MeOH (2% H2O + 0.1% FA)

210615\_HRMS\_IN\_KS\_2Nap 1 (0.041) Cm (1:110)

1: TOF MS ES+  
2.68e+007

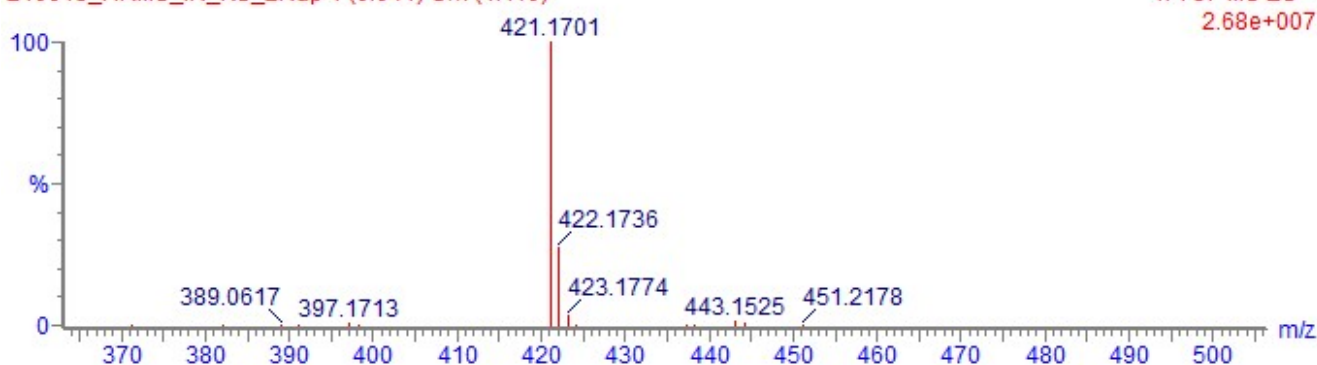

HRMS spectra of 5e

Compound 5f, <sup>1</sup>H NMR, CDCl<sub>3</sub>, 400 MHz

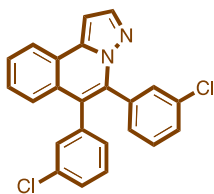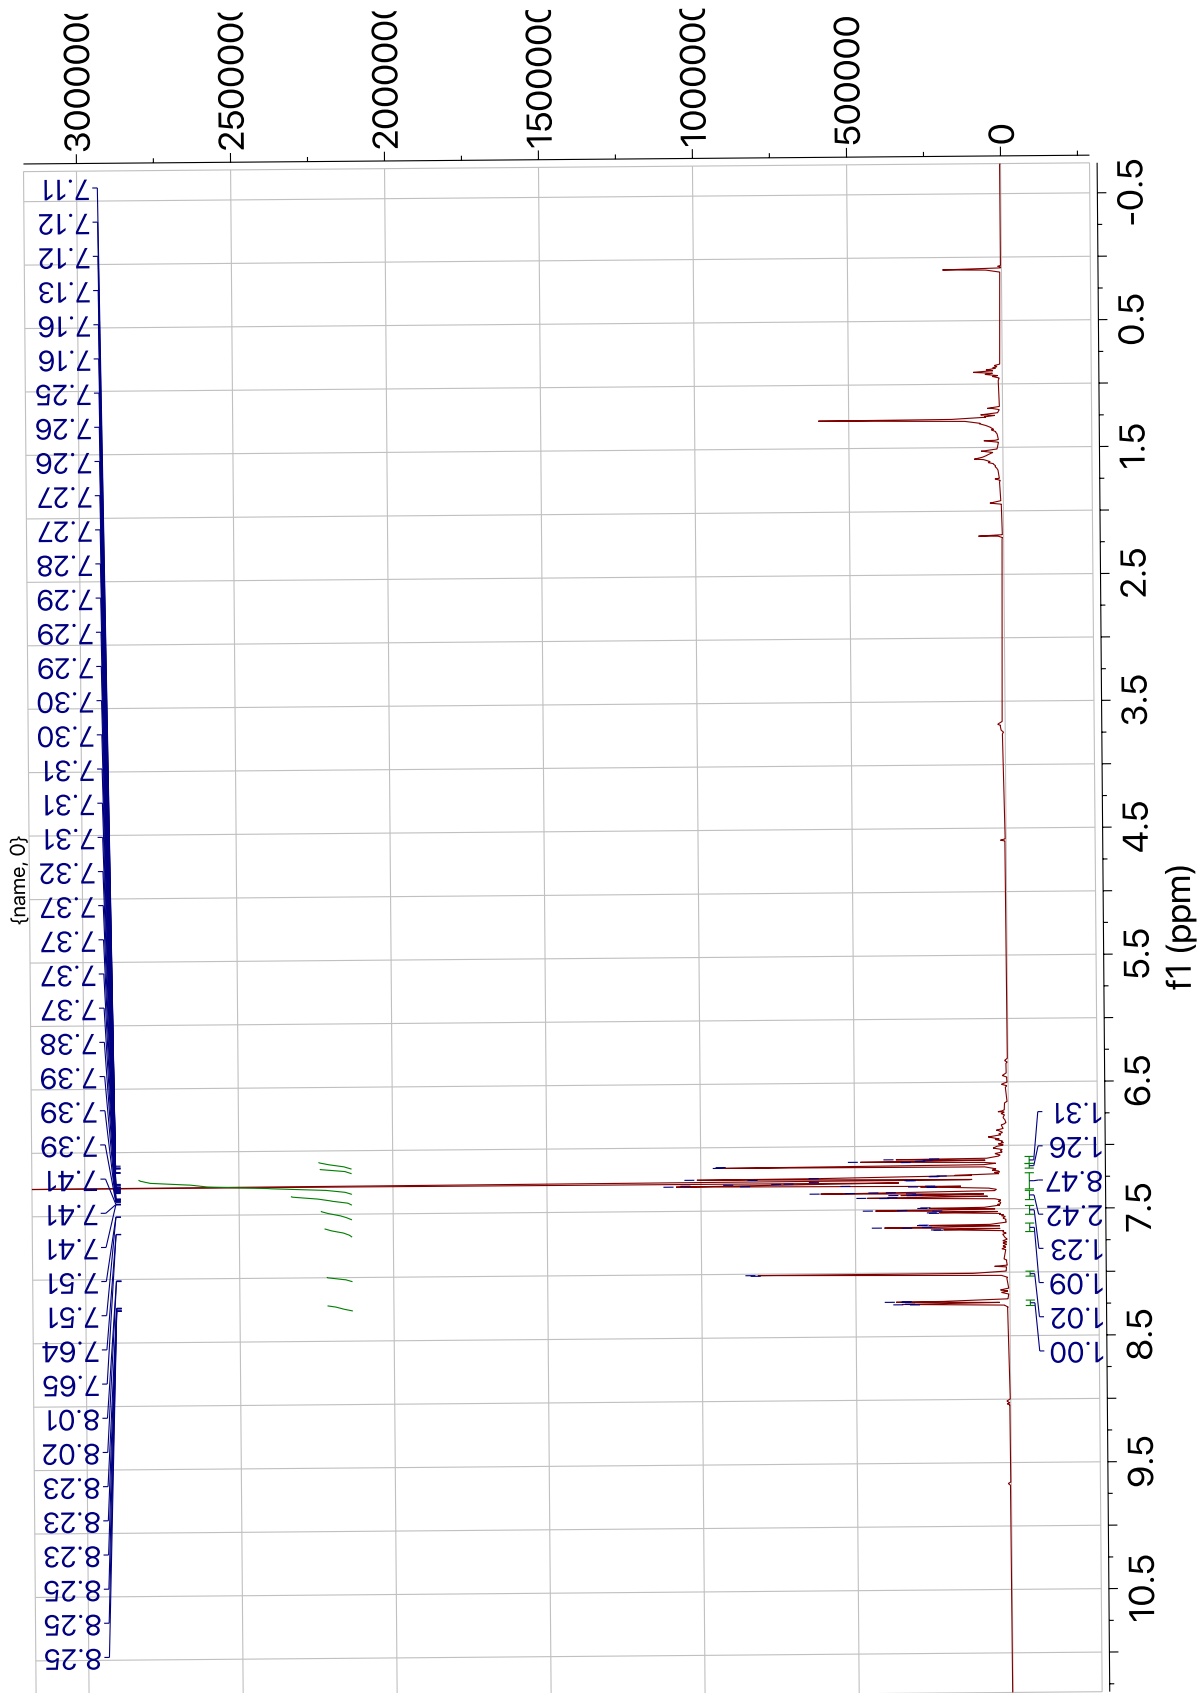

sk-3.210213.20.fid - 3-Cl-AIK-Py-EL - CMC\_PROTON CDCl3 /opt/nmrdat

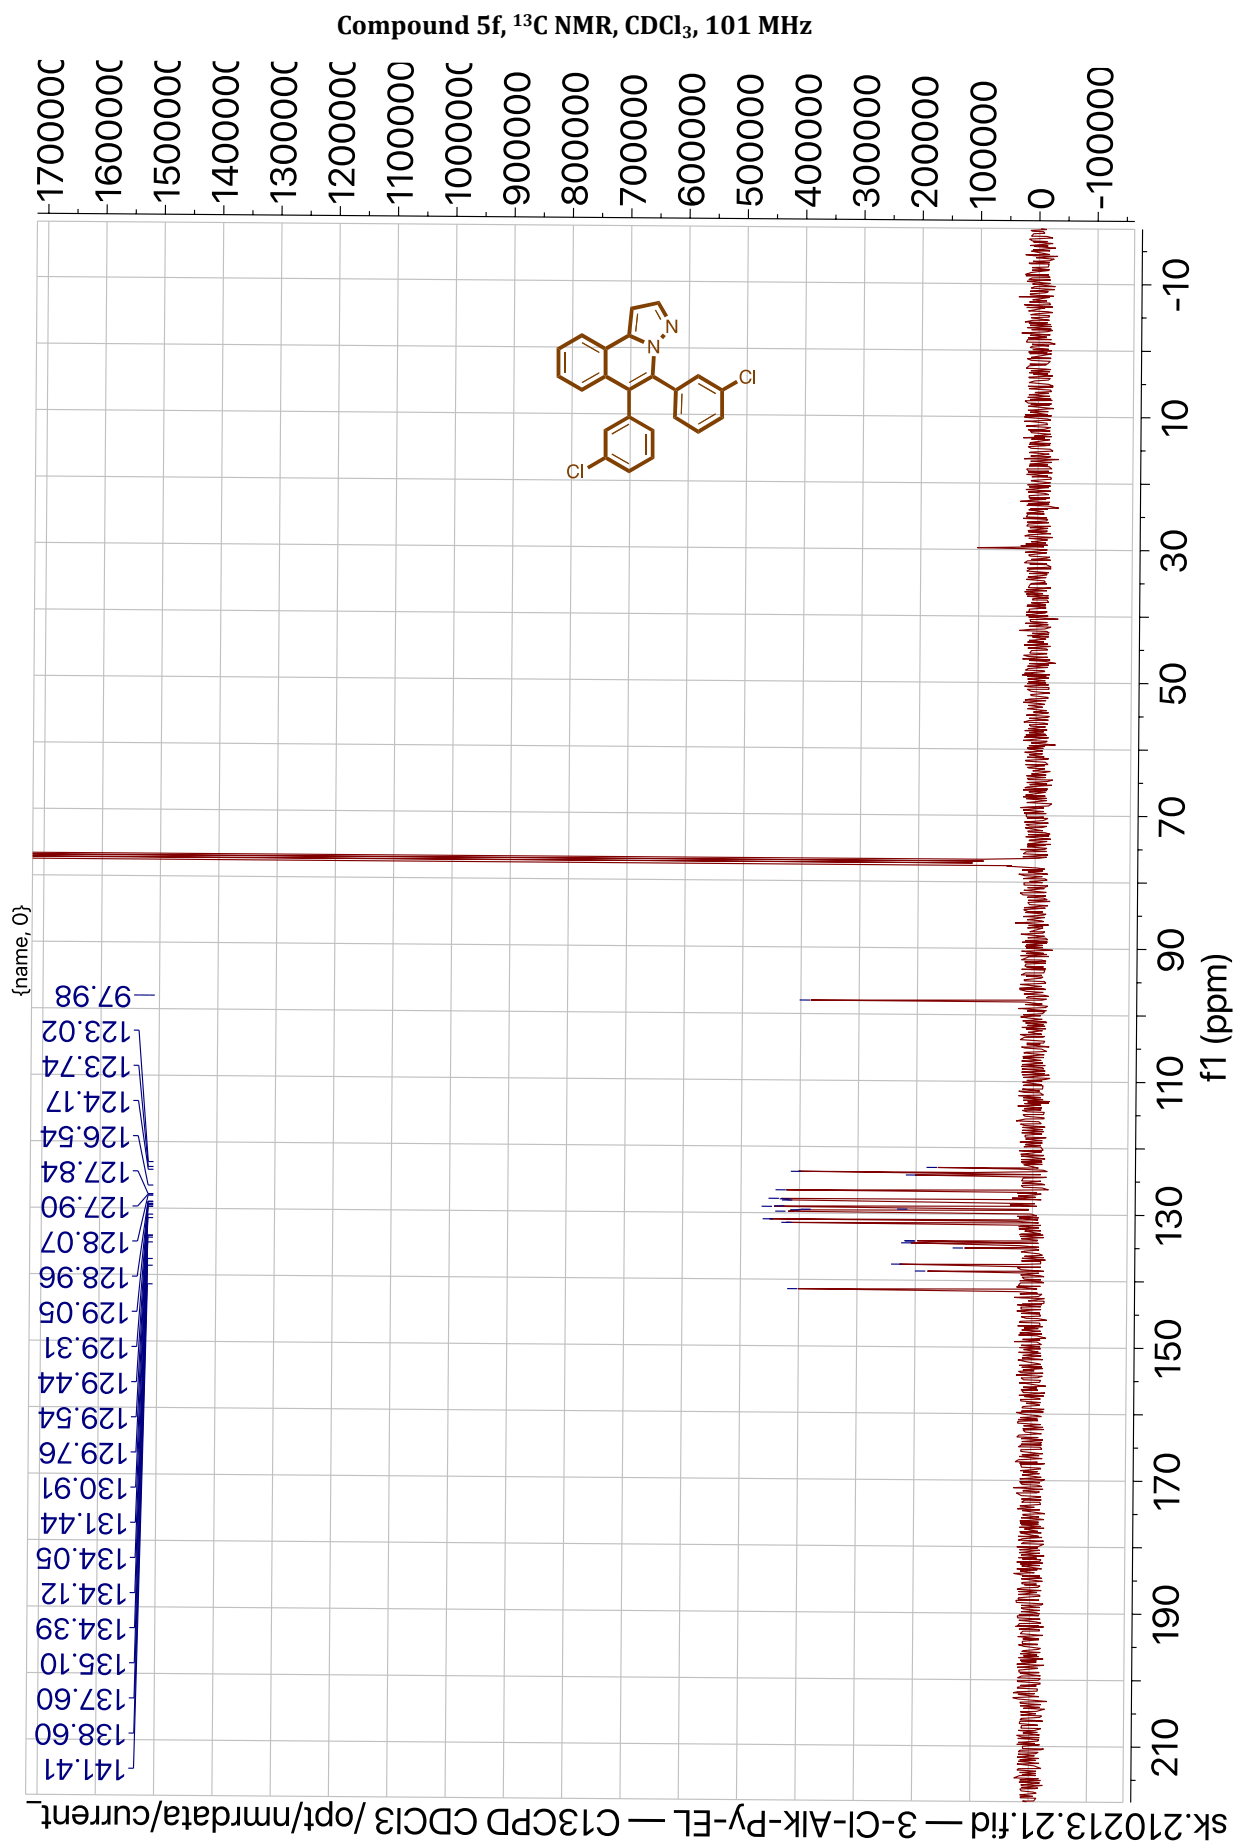

DCM-> MeOH (2% H2O + 0.1% FA)

210615\_HRMS\_IN\_KS\_3Cl 1 (0.041) Cm (1:111)

1: TOF MS ES+  
1.45e7

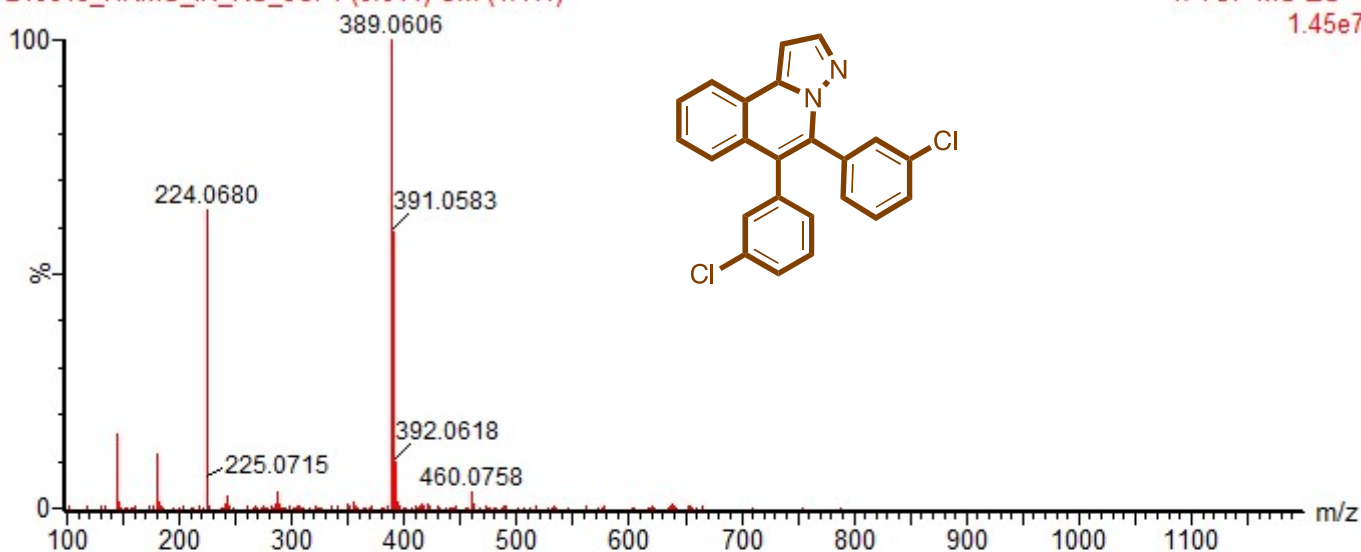

### Single Mass Analysis

Tolerance = 2.0 mDa / DBE: min = -1.5, max = 100.0

Element prediction: Off

Number of isotope peaks used for i-FIT = 3

Monoisotopic Mass, Even Electron Ions

644 formula(e) evaluated with 4 results within limits (all results (up to 1000) for each mass)

Elements Used:

C: 0-50

H: 0-100

N: 0-5

O: 0-3

Na: 0-1

Cl: 0-2

| Mass     | Calc. Mass | mDa  | PPM  | DBE  | Formula           | i-FI... | Fit Conf % | C  | H  | N | O | Na | Cl |
|----------|------------|------|------|------|-------------------|---------|------------|----|----|---|---|----|----|
| 389.0606 | 389.0603   | 0.3  | 0.8  | 25.5 | C29 H9 O2         | 516.... | 0.00       | 29 | 9  |   | 2 |    |    |
|          | 389.0612   | -0.6 | -1.5 | 16.5 | C23 H15 N2 Cl2    | 30.134  | 87.48      | 23 | 15 | 2 |   |    | 2  |
|          | 389.0594   | 1.2  | 3.1  | 21.5 | C24 H10 N4 Cl     | 45.452  | 0.43       | 24 | 10 | 4 |   |    | 1  |
|          | 389.0588   | 1.8  | 4.6  | 13.5 | C21 H16 N2 Na Cl2 | 32.113  | 12.09      | 21 | 16 | 2 |   | 1  | 2  |

DCM-> MeOH (2% H2O + 0.1% FA)

210615\_HRMS\_IN\_KS\_3Cl 1 (0.041) Cm (1:111)

1: TOF MS ES+  
1.45e+007

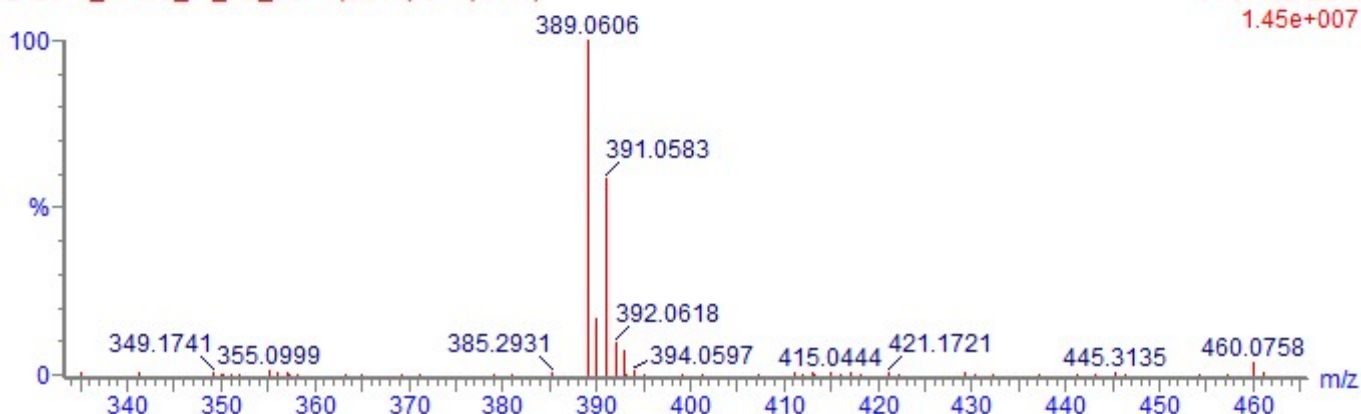

HRMS spectra of 5f

Compound 5h, <sup>1</sup>H NMR, CDCl<sub>3</sub>, 400 MHz

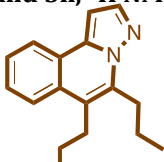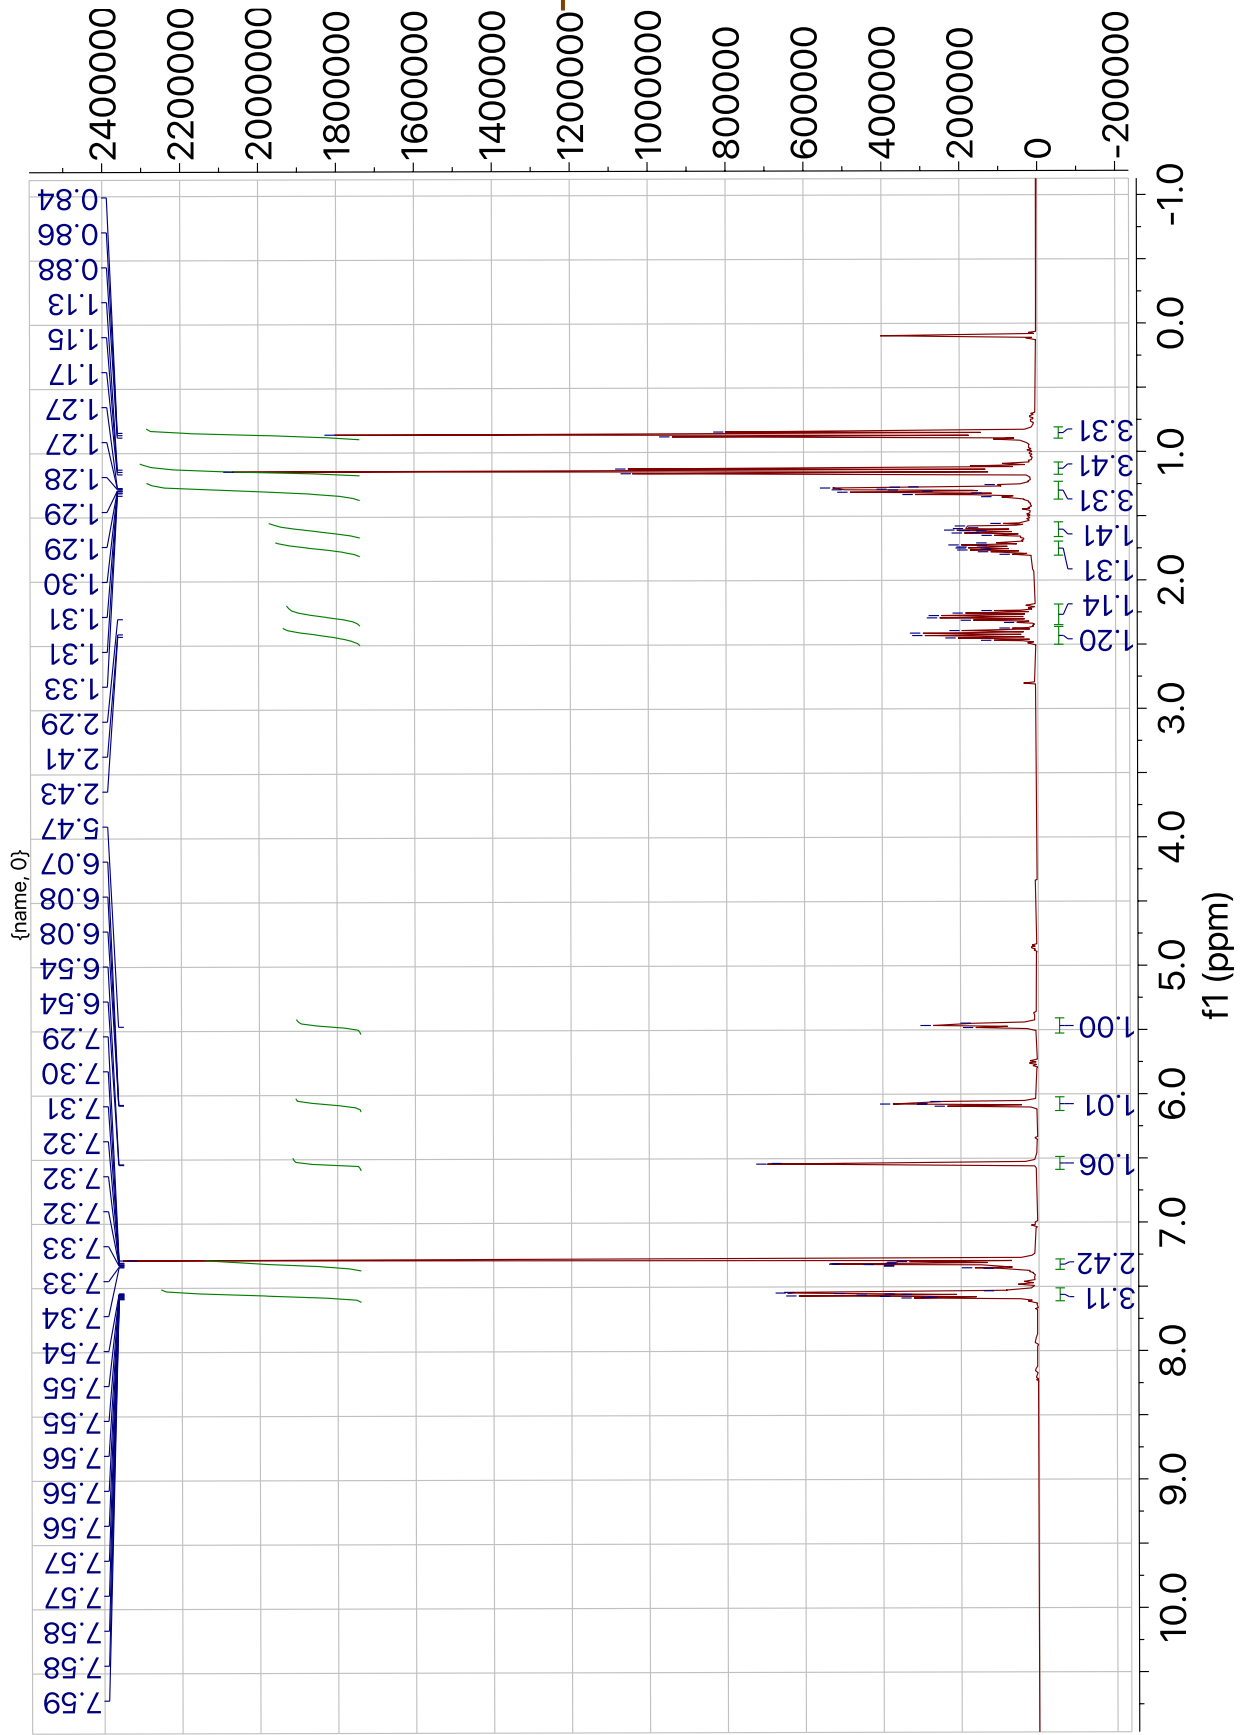

sk-5.210213.30.fid — 4-Octyne-Py-EL — CMC\_PROTON CDCl<sub>3</sub> /opt/nmrda

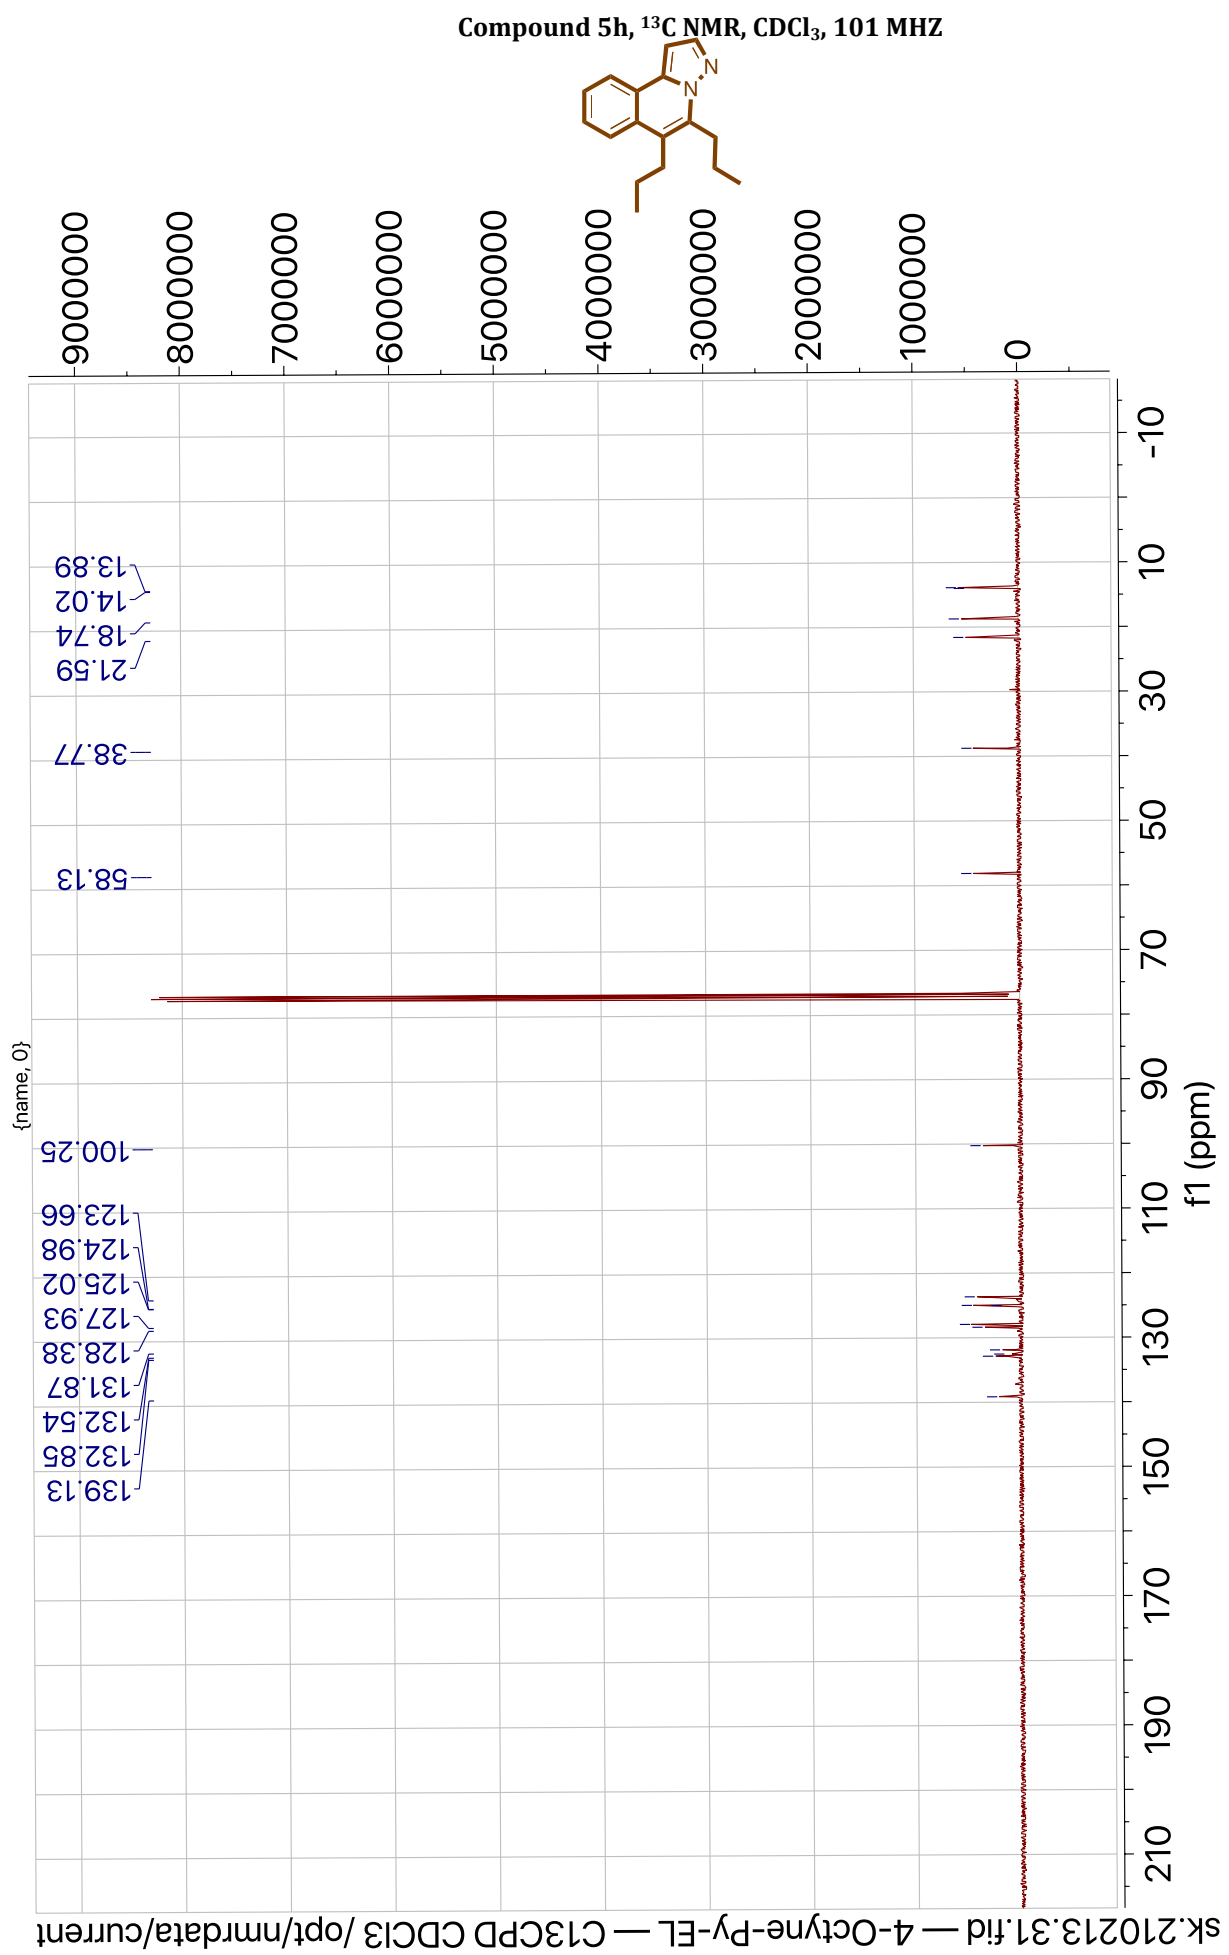



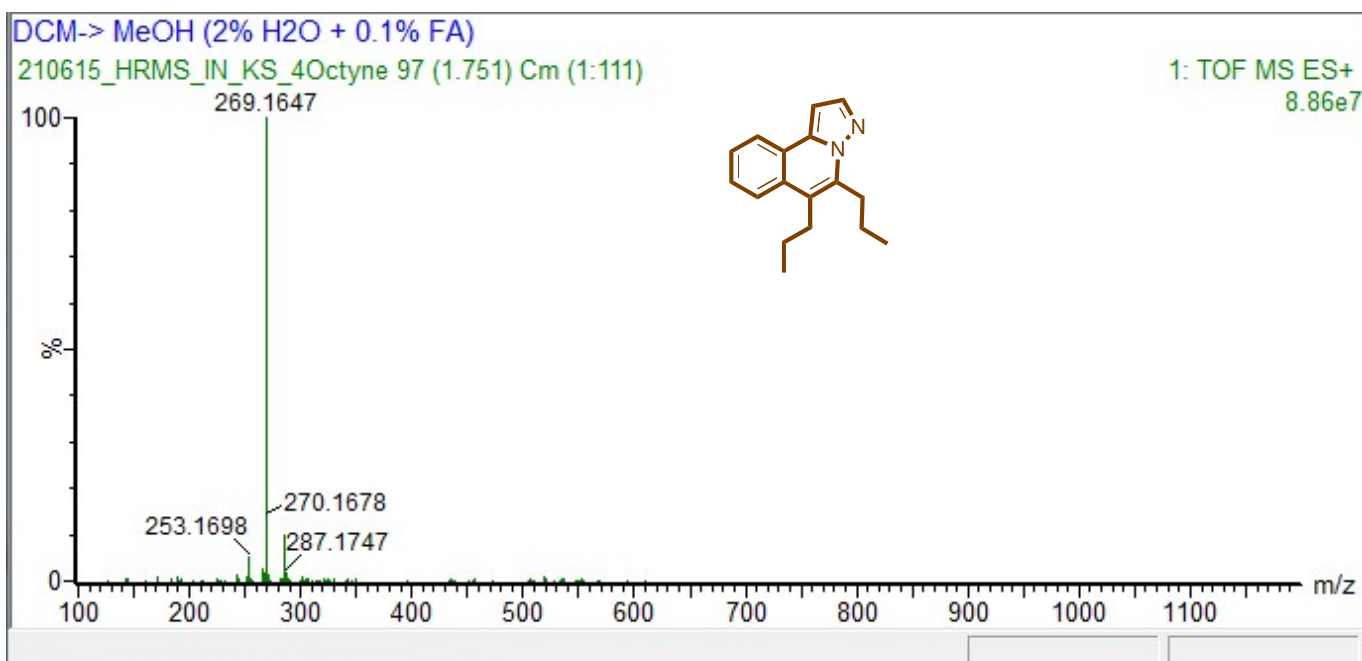

### Single Mass Analysis

Tolerance = 2.0 mDa / DBE: min = -1.5, max = 100.0

Element prediction: Off

Number of isotope peaks used for i-FIT = 3

Monoisotopic Mass, Even Electron Ions

160 formula(e) evaluated with 2 results within limits (all results (up to 1000) for each mass)

Elements Used:

C: 0-50      H: 0-100      N: 0-5      O: 0-3      Na: 0-1

| Mass     | Calc. Mass | mDa  | PPM  | DBE | Formula       | i. | Fit Conf % | C  | H  | N | O | Na |
|----------|------------|------|------|-----|---------------|----|------------|----|----|---|---|----|
| 253.1698 | 253.1705   | -0.7 | -2.8 | 8.5 | C17 H21 N2    | 6  | 37.92      | 17 | 21 | 2 |   |    |
|          | 253.1681   | 1.7  | 6.7  | 5.5 | C15 H22 N2 Na | 6  | 62.08      | 15 | 22 | 2 |   | 1  |

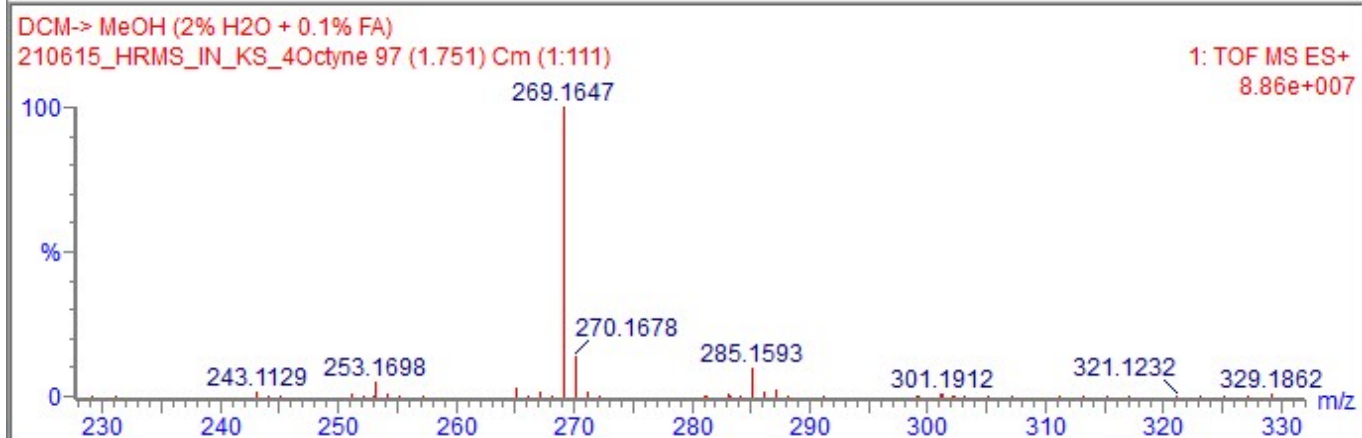

HRMS spectra of **5h**

Compound 5i, <sup>1</sup>H NMR, CDCl<sub>3</sub>, 400 MHz

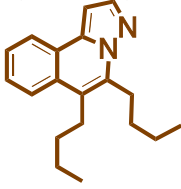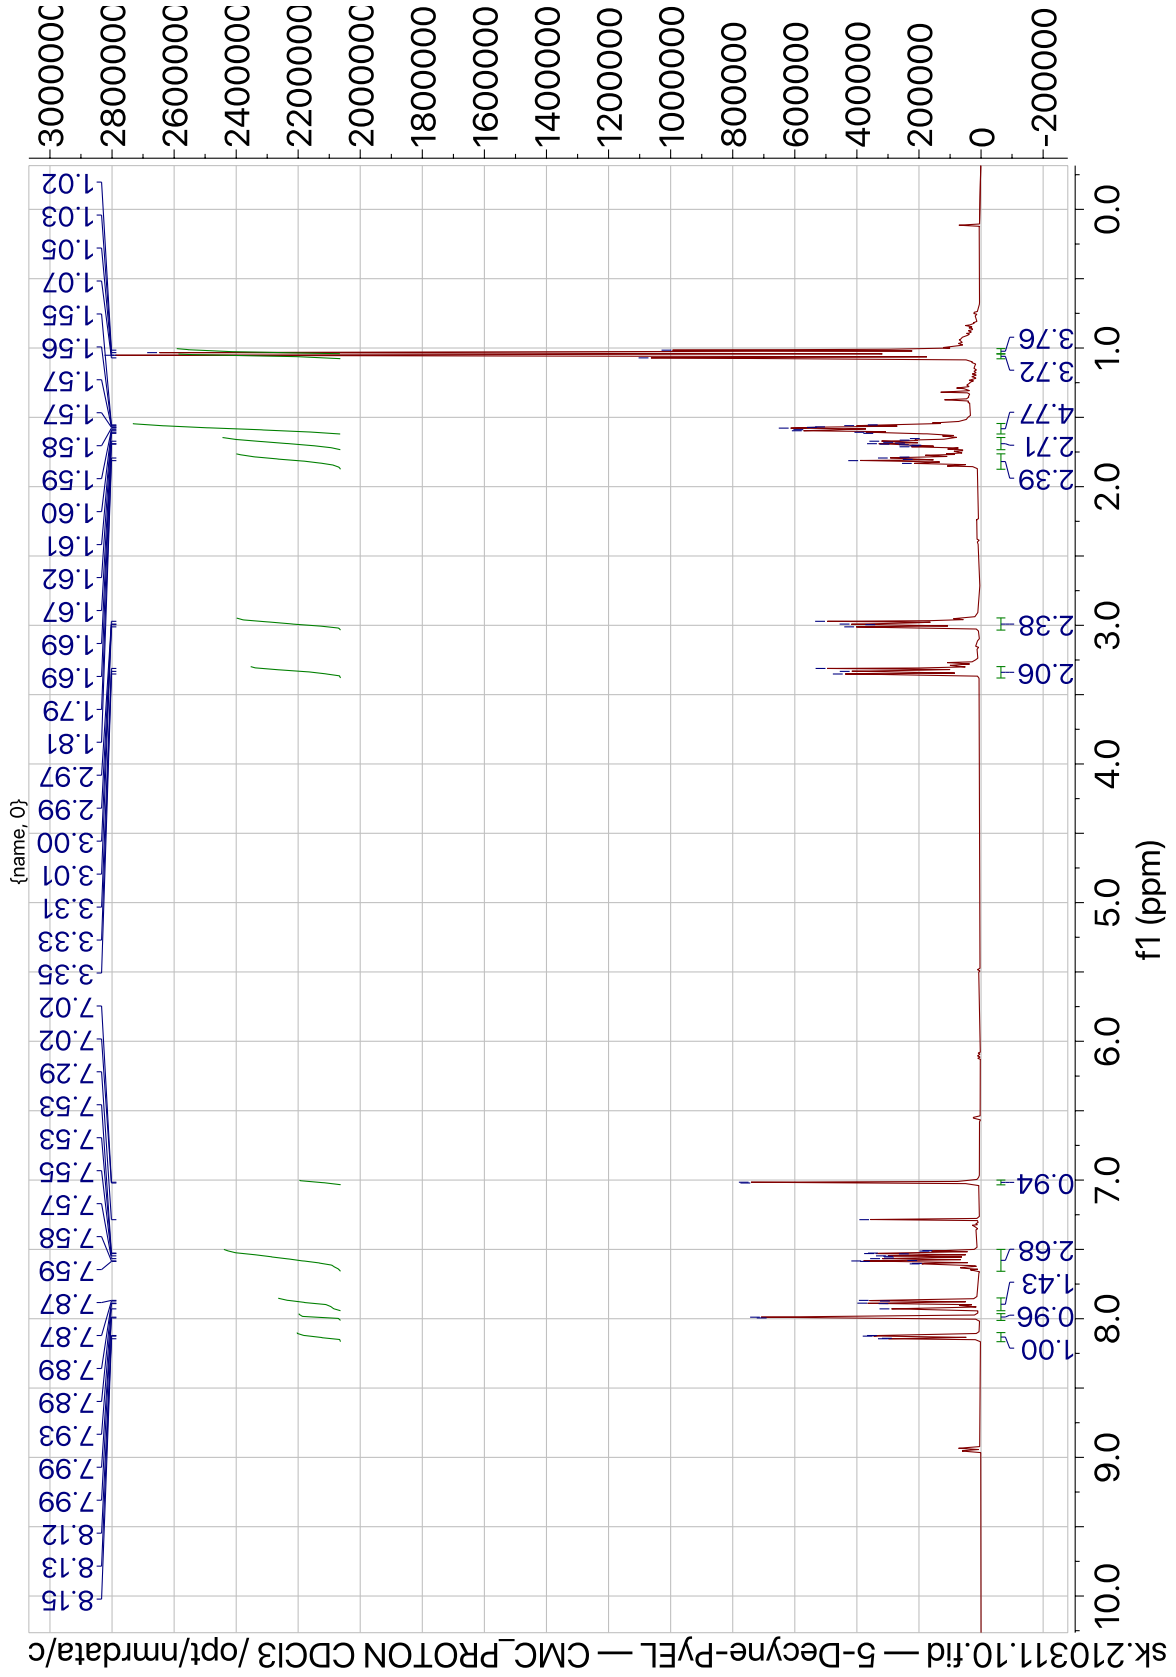

Compound 5i, <sup>13</sup>C NMR, CDCl<sub>3</sub>, 101 MHz

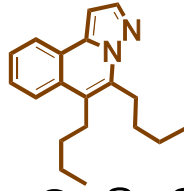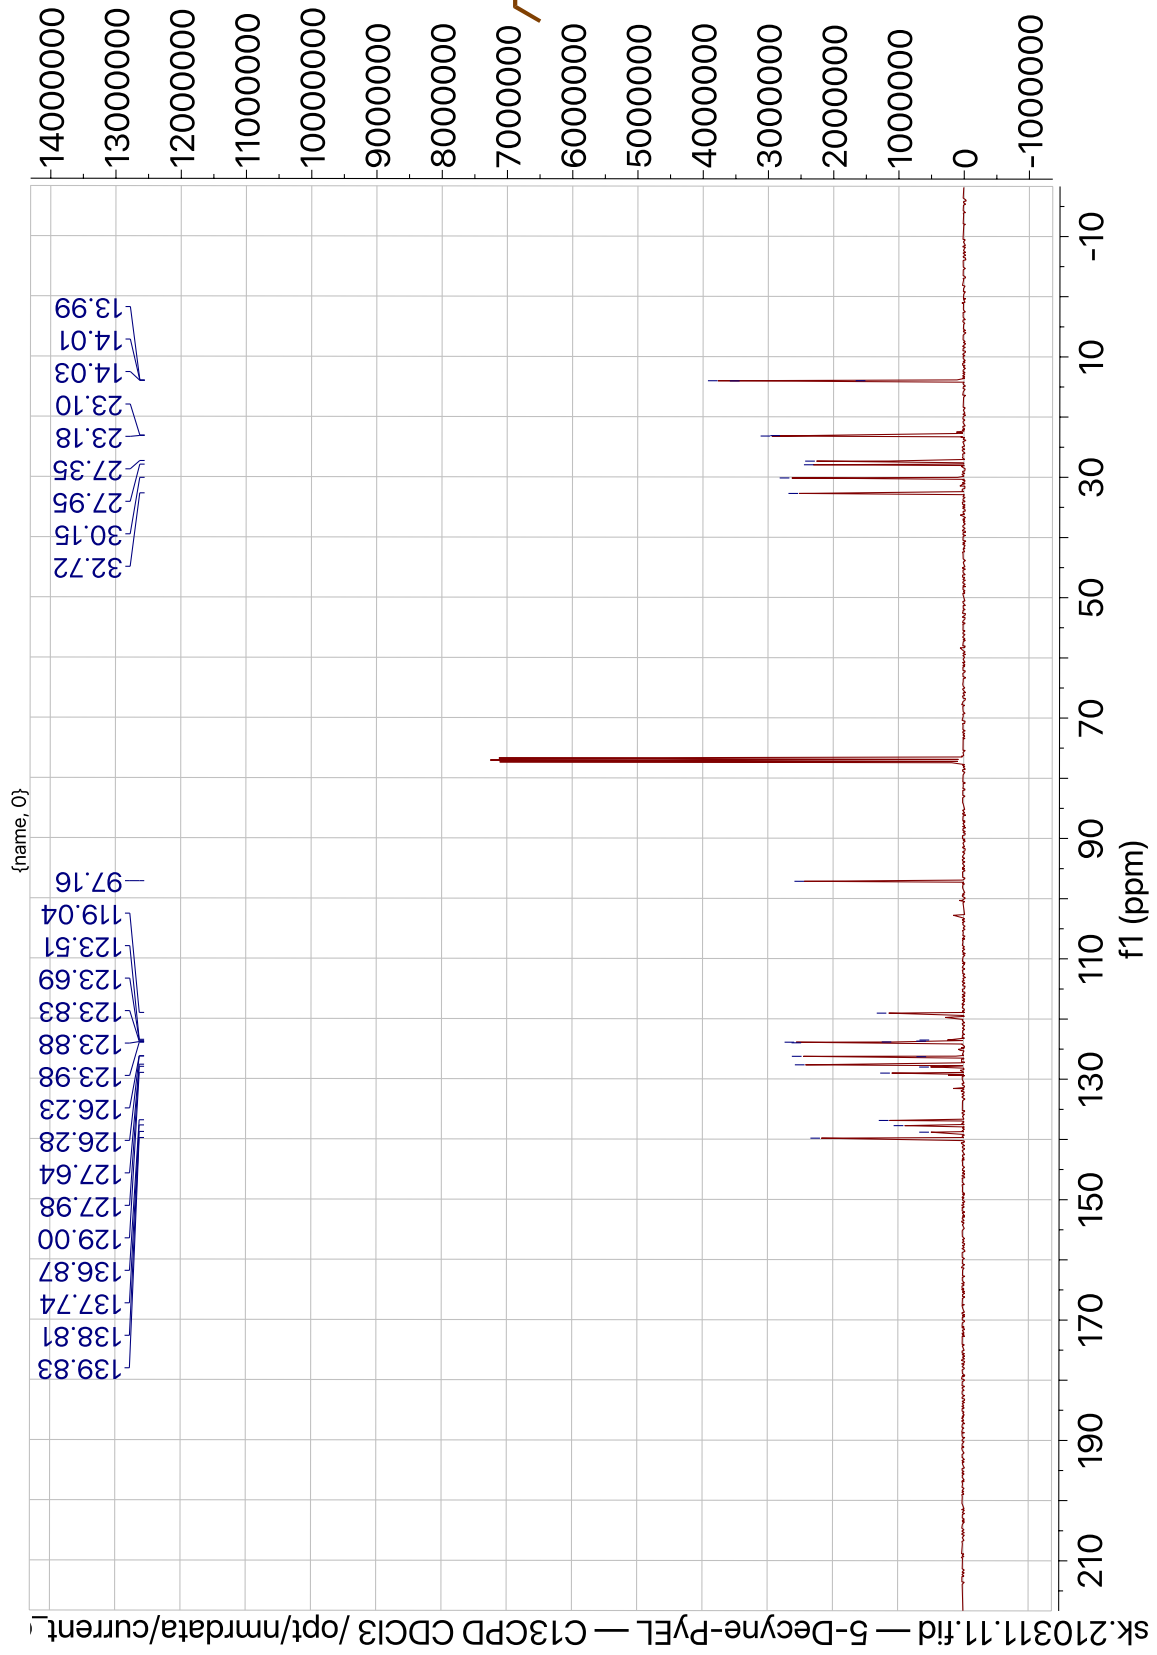

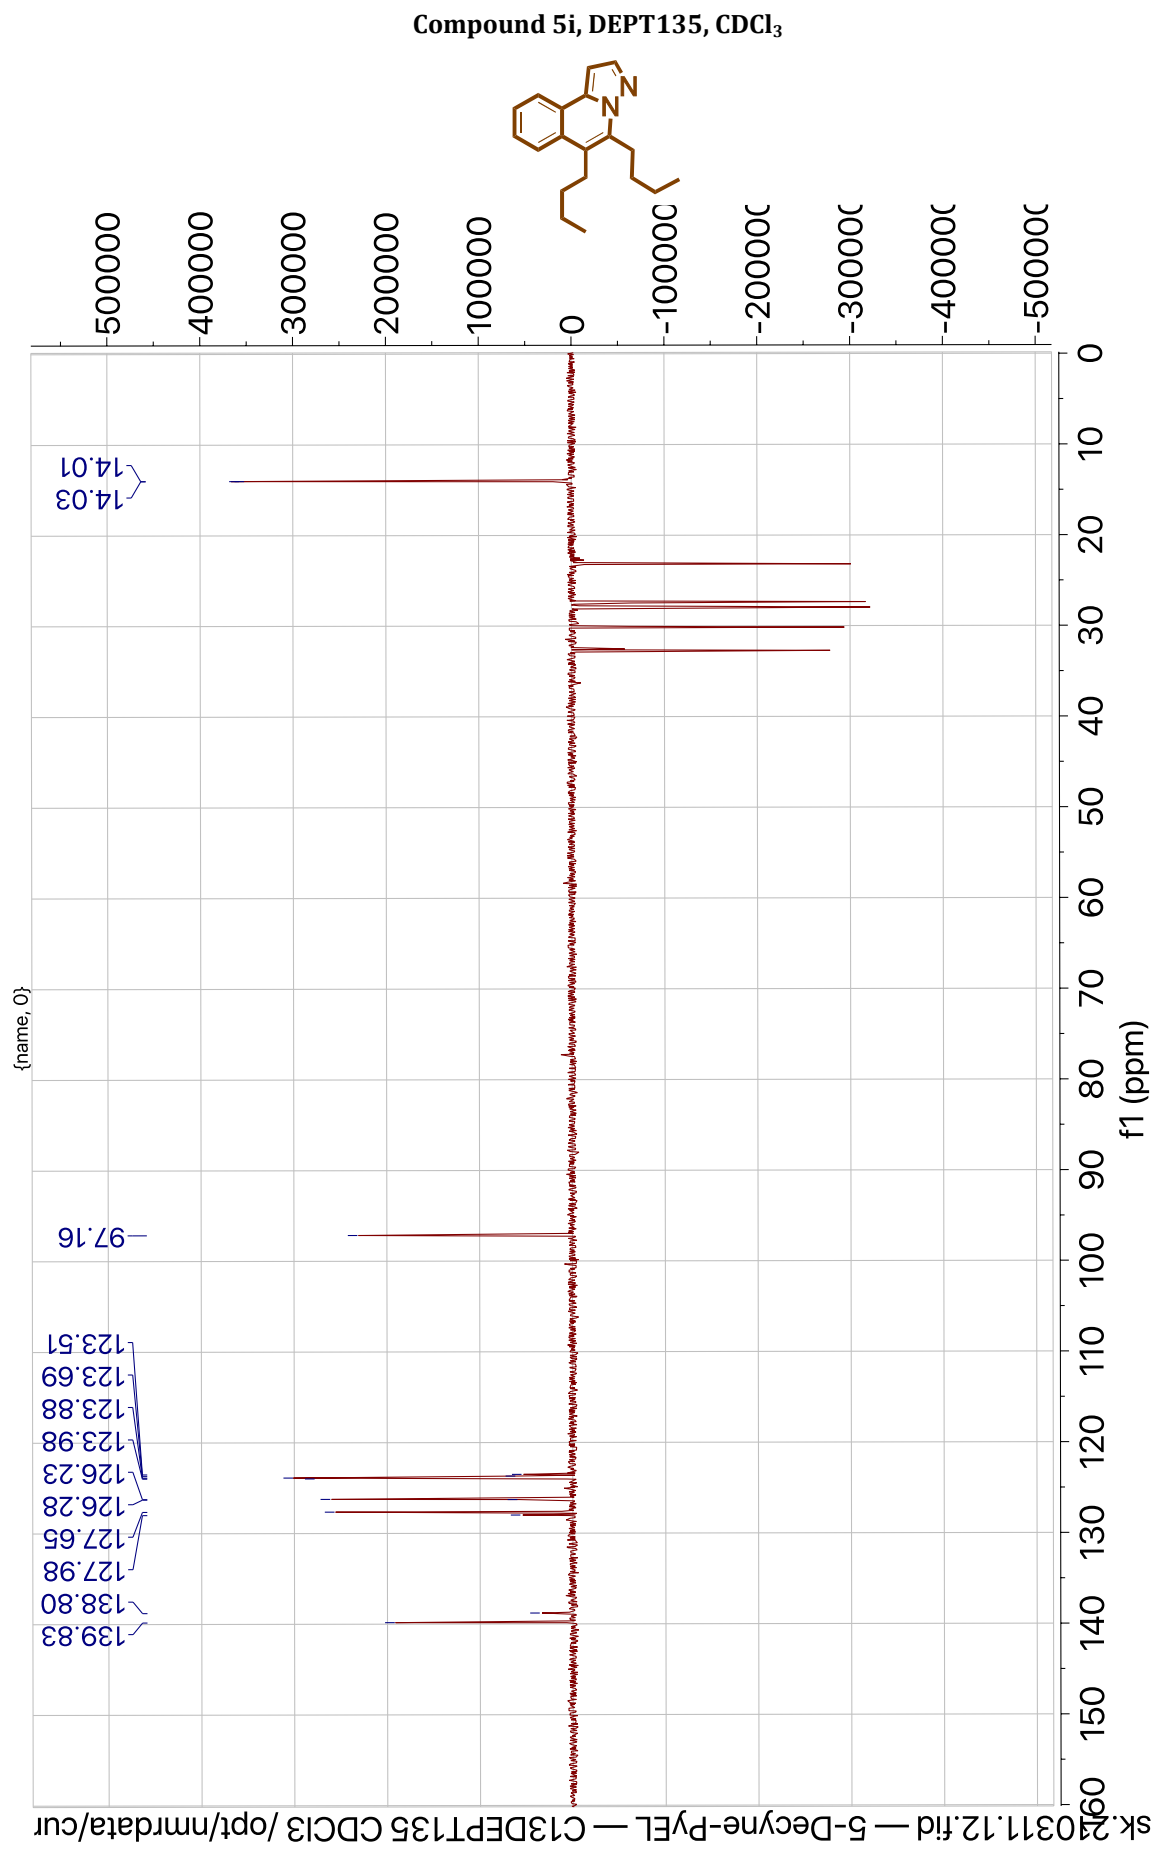

DCM-> MeOH (2% H2O + 0.1% FA)  
 210615\_HRMS\_IN\_KS\_Decyne 1 (0.041) Cm (1:111)

1: TOF MS ES+  
 2.56e7

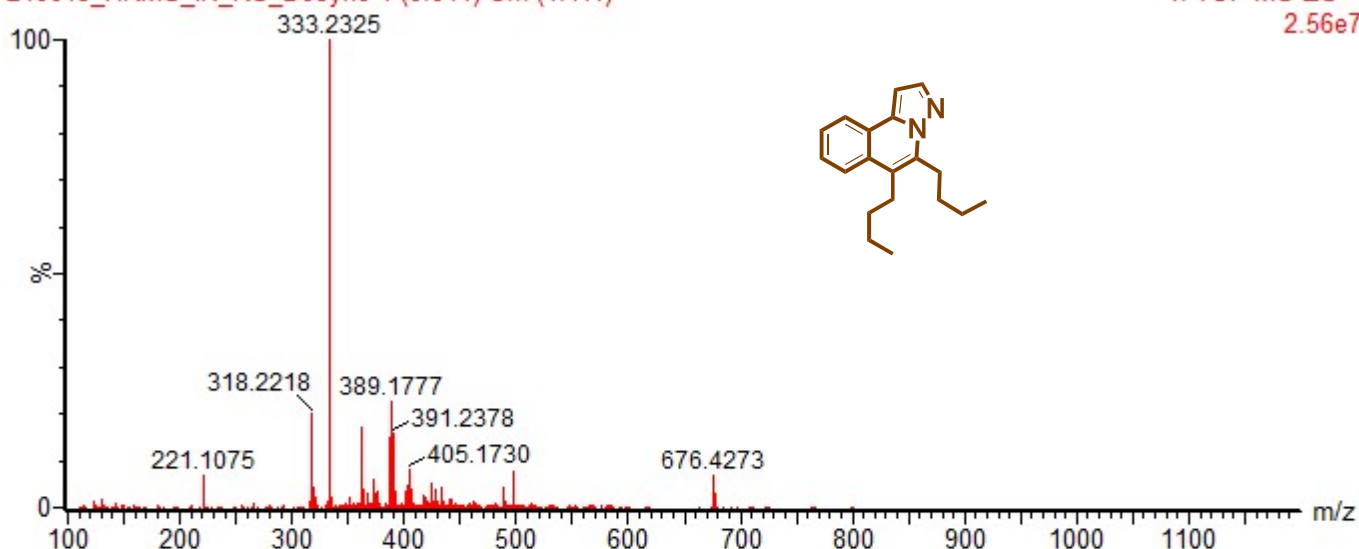

### Single Mass Analysis

Tolerance = 2.0 mDa / DBE: min = -1.5, max = 100.0

Element prediction: Off

Number of isotope peaks used for i-FIT = 3

Monoisotopic Mass, Even Electron Ions

207 formula(e) evaluated with 2 results within limits (all results (up to 1000) for each mass)

Elements Used:

C: 0-50      H: 0-100      N: 0-5      O: 0-3      Na: 0-1

| Mass     | Calc. Mass | mDa  | PPM  | DBE  | Formula       | i-FIT | i, Fit Conf ... | C  | H  | N | O | Na |
|----------|------------|------|------|------|---------------|-------|-----------------|----|----|---|---|----|
| 333.2325 | 333.2331   | -0.6 | -1.8 | 10.5 | C23 H29 N2    | 106.8 | 0..45.27        | 23 | 29 | 2 |   |    |
|          | 333.2307   | 1.8  | 5.4  | 7.5  | C21 H30 N2 Na | 106.6 | 0..54.73        | 21 | 30 | 2 |   | 1  |

DCM-> MeOH (2% H2O + 0.1% FA)  
 210615\_HRMS\_IN\_KS\_Decyne 1 (0.041) Cm (1:111)

1: TOF MS ES+  
 2.56e+007

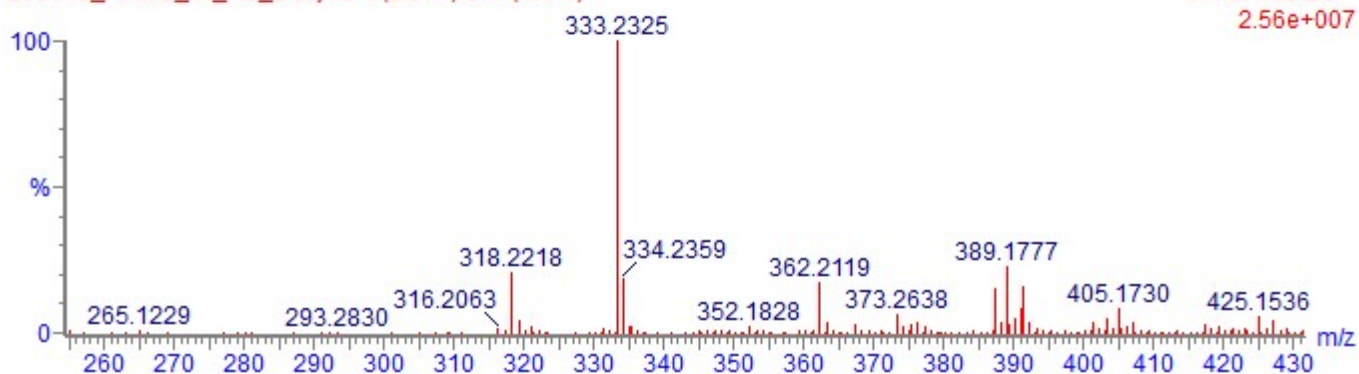

HRMS spectra of **5i**

Compound 5j, <sup>1</sup>H NMR, CDCl<sub>3</sub>, 400 MHz

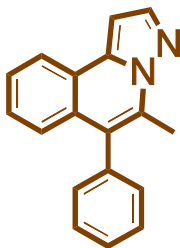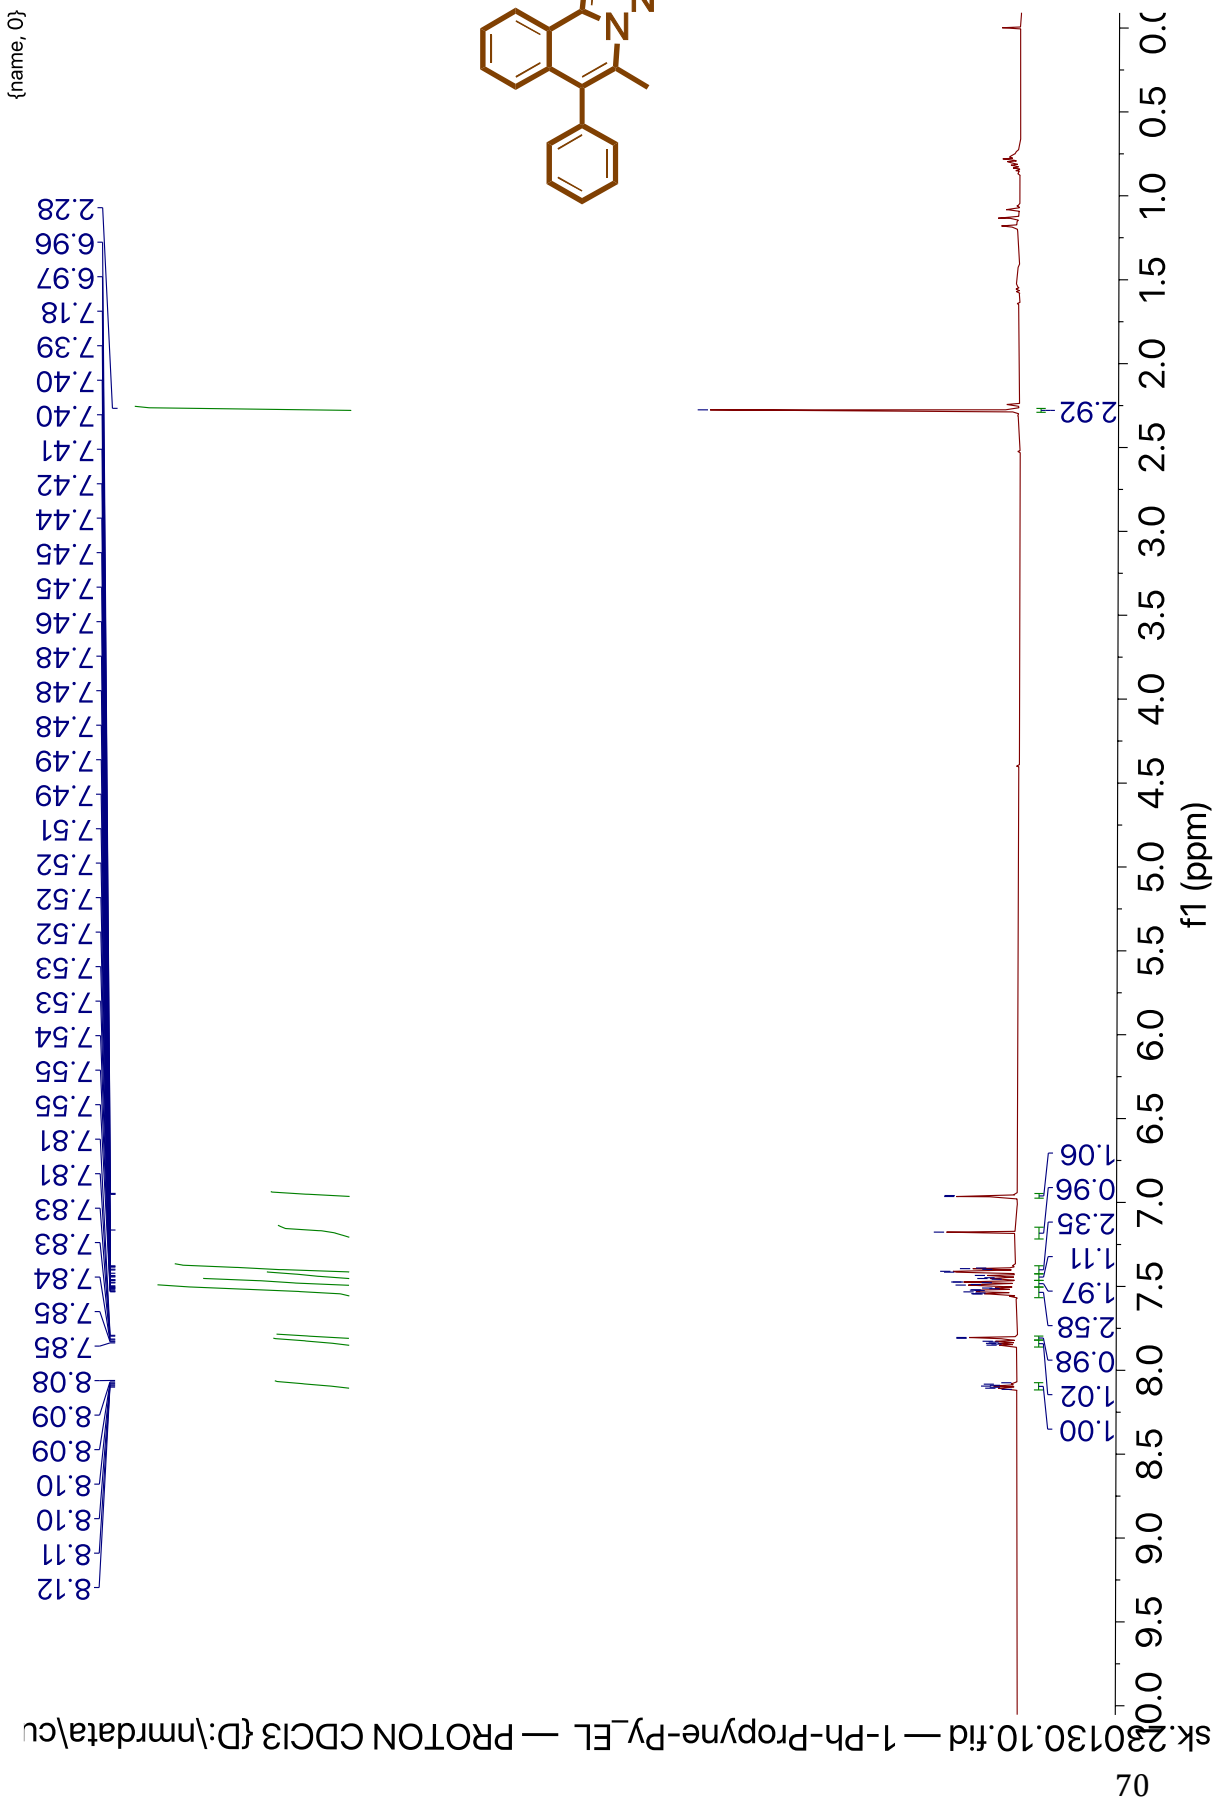

Compound 5j, <sup>13</sup>C NMR, CDCl<sub>3</sub>, 101 MHz

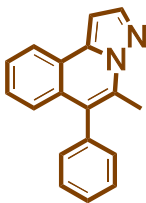

{name, 0}

-15.02

140.47  
138.01  
135.94  
133.88  
130.40  
129.86  
128.91  
128.73  
127.86  
127.25  
124.46  
124.18  
123.88  
116.25  
97.32

f1 (ppm)

sk-4.230130.11.fid - 1-Ph-Propyne-Py\_EL - C13CPD CDCl3 {D:\nmrdata\}



DCM-> MeOH (2% H2O + 0.1% FA)

210615\_HRMS\_IN\_KS\_PhPropyne\_B 9 (0.184) Cm (1:110)

1: TOF MS ES+  
4.47e7

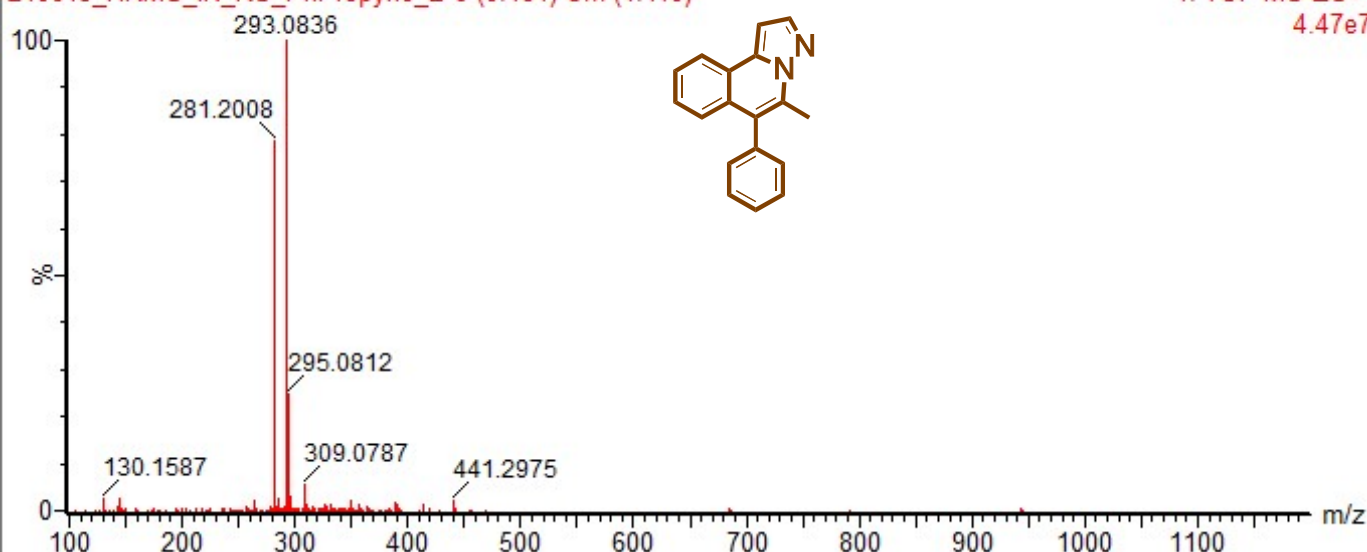

### Single Mass Analysis

Tolerance = 2.0 mDa / DBE: min = -1.5, max = 100.0

Element prediction: Off

Number of isotope peaks used for i-FIT = 3

Monoisotopic Mass, Even Electron Ions

176 formula(e) evaluated with 2 results within limits (all results (up to 1000) for each mass)

Elements Used:

C: 0-50

H: 0-100

N: 0-5

O: 0-3

Na: 0-1

| Mass     | Calc. Mass | mDa  | PPM  | DBE | Formula       | i-... | Fit Conf % | C  | H  | N | O | Na |
|----------|------------|------|------|-----|---------------|-------|------------|----|----|---|---|----|
| 281.2008 | 281.2018   | -1.0 | -3.6 | 8.5 | C19 H25 N2    | 6...  | 35.66      | 19 | 25 | 2 |   |    |
|          | 281.1994   | 1.4  | 5.0  | 5.5 | C17 H26 N2 Na | 6...  | 64.34      | 17 | 26 | 2 |   | 1  |

DCM-> MeOH (2% H2O + 0.1% FA)

210615\_HRMS\_IN\_KS\_PhPropyne\_B 9 (0.184) Cm (1:110)

1: TOF MS ES+  
4.47e+007

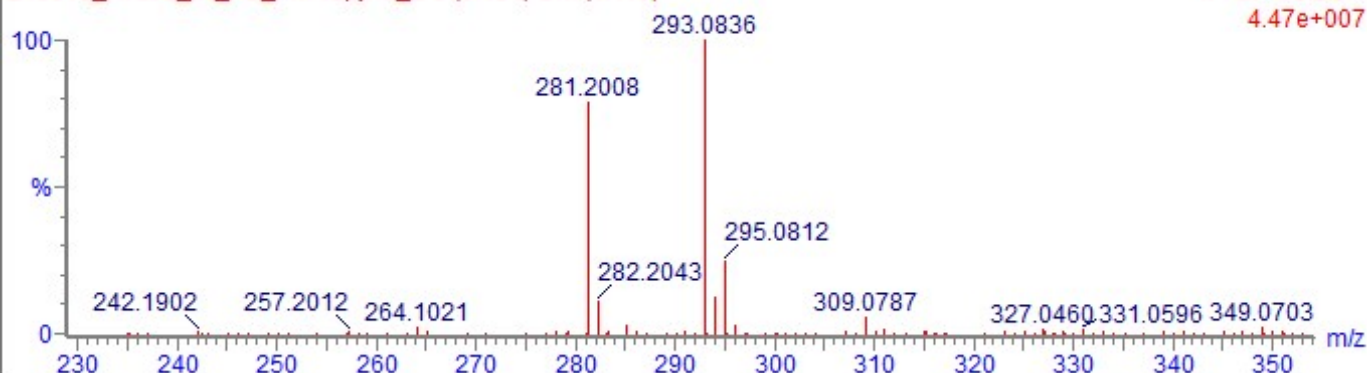

HRMS spectra of 5j



Compound 5k, <sup>1</sup>H NMR, CDCl<sub>3</sub>, 400 MHz

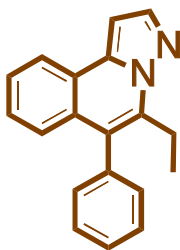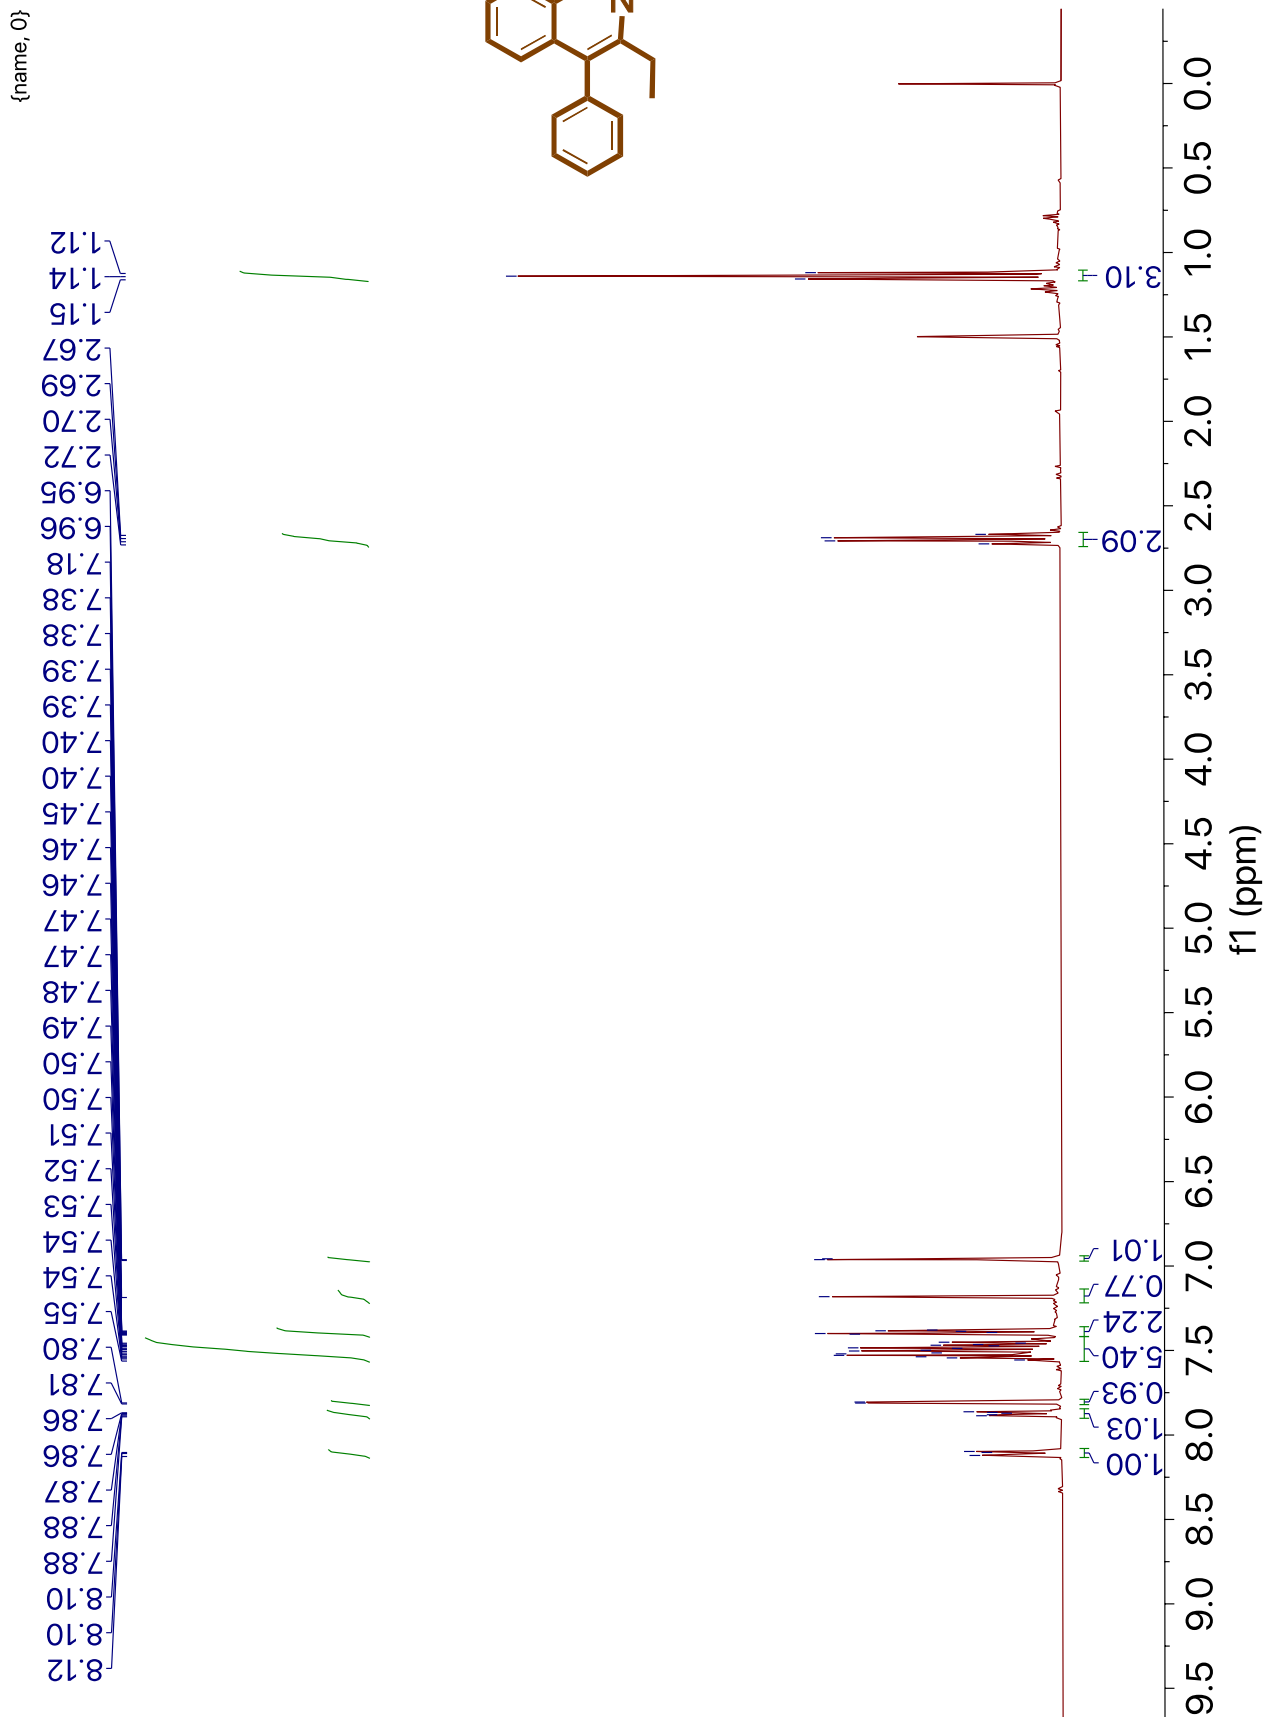

sk-2.230130.20.fid - 1-Ph-Butyne-Py-EL - PROTON CDCl<sub>3</sub> {D:\nmrdata\}

sk-3.230130.21.fid — 1-Ph-Butyne-Py-EL — C13CPD CDCl3 {D:\nmrdata\c

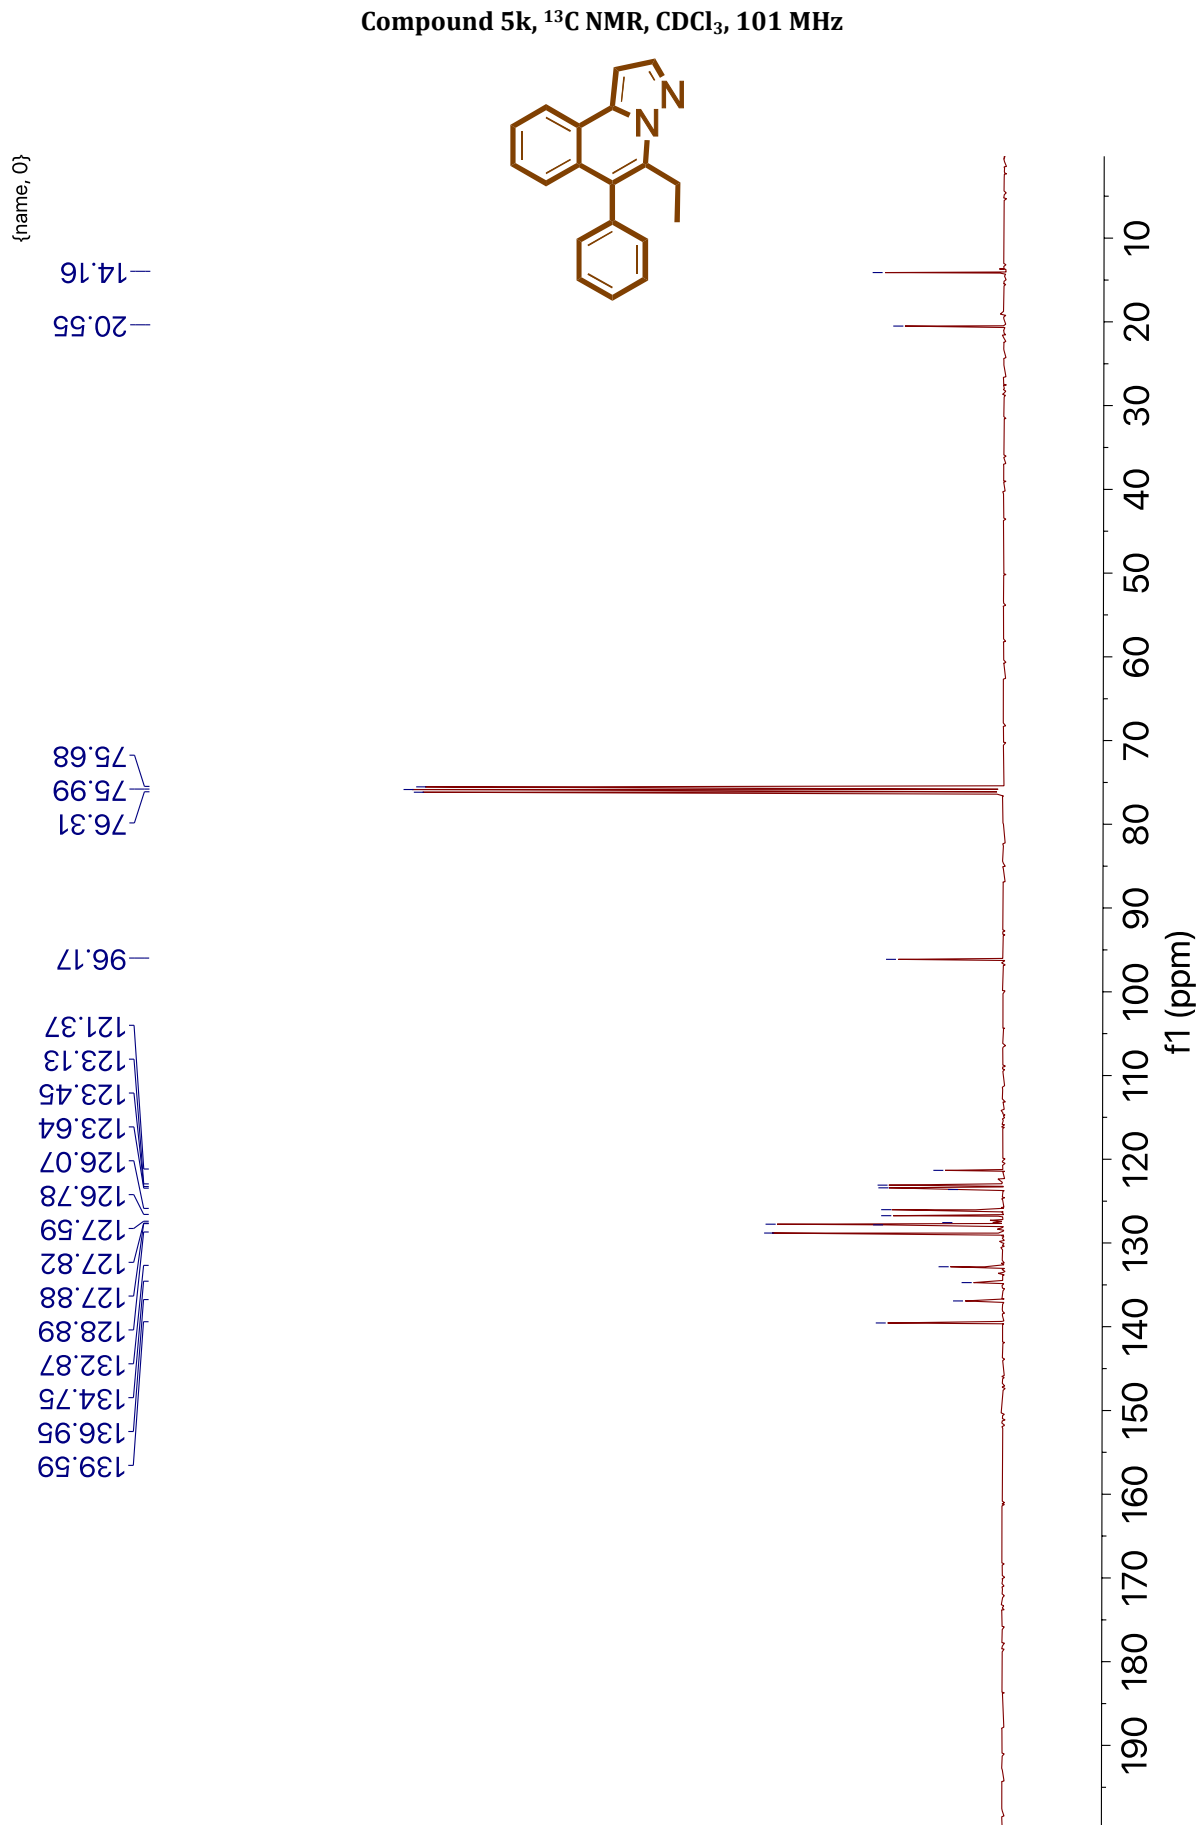

DCM-> MeOH (2% H2O + 0.1% FA)

210615\_HRMS\_IN\_KS\_PhButyne\_B 1 (0.041) Cm (1:111)

1: TOF MS ES+  
3.18e7

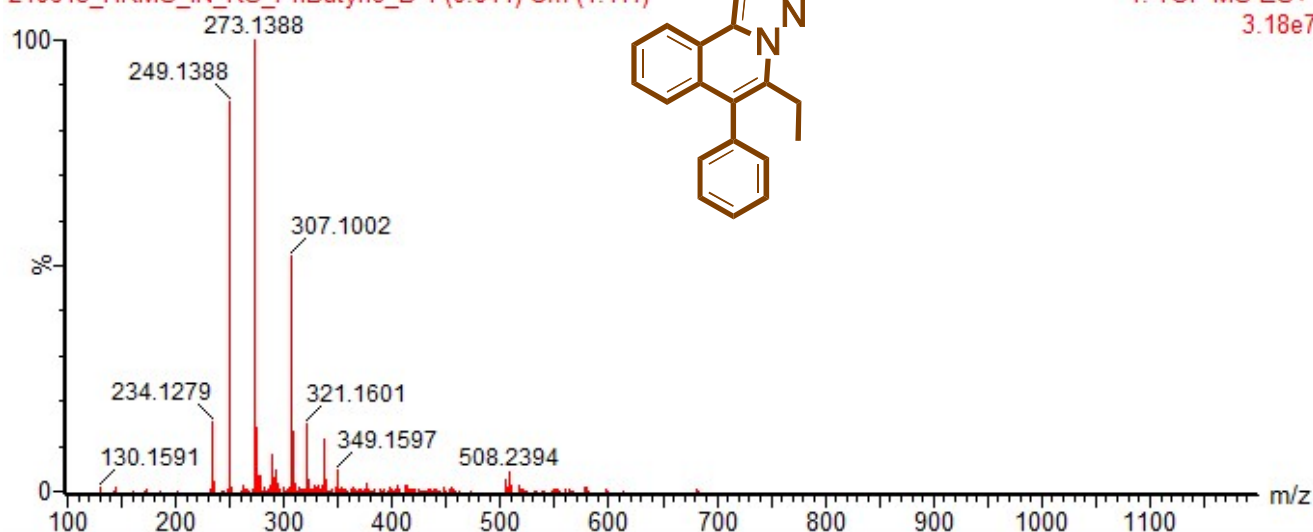

### Single Mass Analysis

Tolerance = 2.0 mDa / DBE: min = -1.5, max = 100.0

Element prediction: Off

Number of isotope peaks used for i-FIT = 3

Monoisotopic Mass, Even Electron Ions

171 formula(e) evaluated with 1 results within limits (all results (up to 1000) for each mass)

Elements Used:

C: 0-50      H: 0-100      N: 0-5      O: 0-3      Na: 0-1

| Mass     | Calc. Mass | mDa  | PPM  | DBE  | Formula    | i-FIT | i-FIT Norm | Fit Conf % | C  | H  | N | O | Na |
|----------|------------|------|------|------|------------|-------|------------|------------|----|----|---|---|----|
| 273.1388 | 273.1392   | -0.4 | -1.5 | 12.5 | C19 H17 N2 | 70.5  | n/a        | n/a        | 19 | 17 | 2 |   |    |

DCM-> MeOH (2% H2O + 0.1% FA)

210615\_HRMS\_IN\_KS\_PhButyne\_B 1 (0.041) Cm (1:111)

1: TOF MS ES+  
3.18e+007

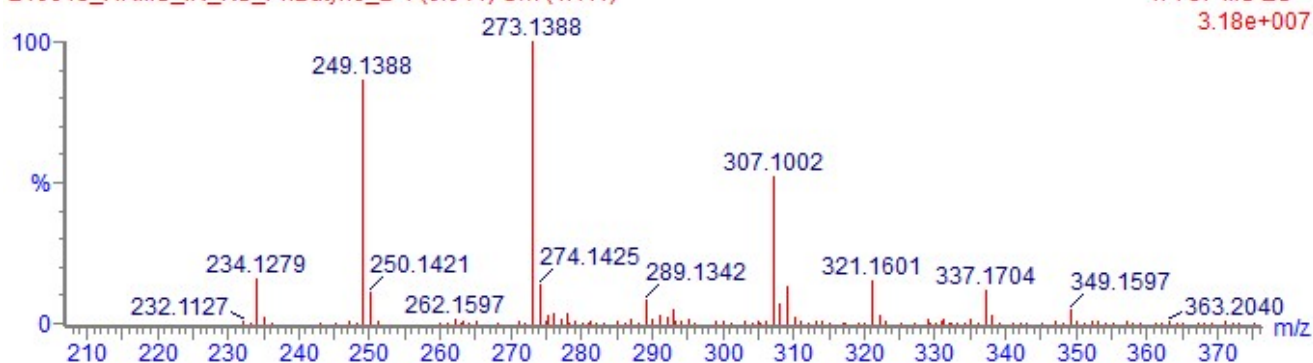

HRMS spectra of **5k**

Compound 5l, <sup>1</sup>H NMR, CDCl<sub>3</sub>, 400 MHz

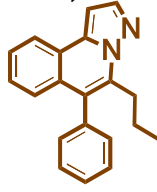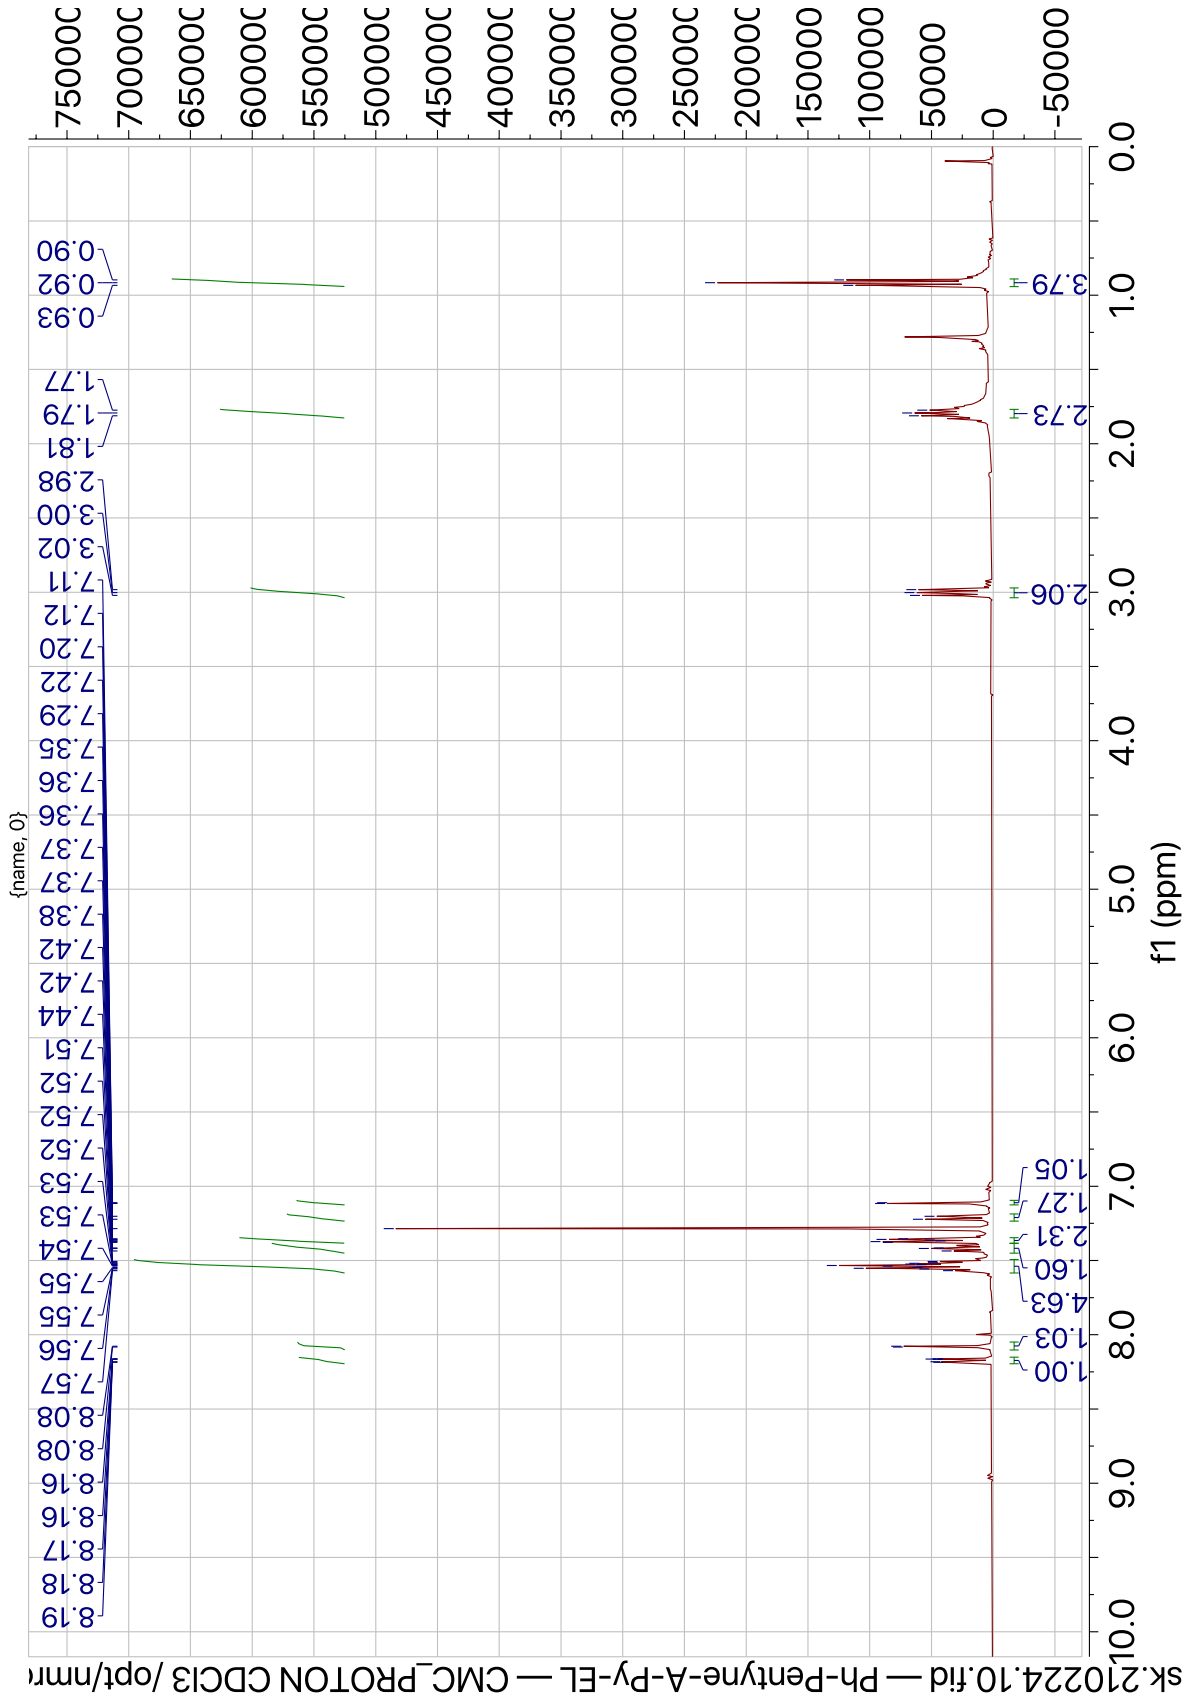

Compound 5l, <sup>13</sup>C NMR, CDCl<sub>3</sub>, 101 MHz

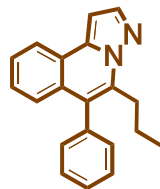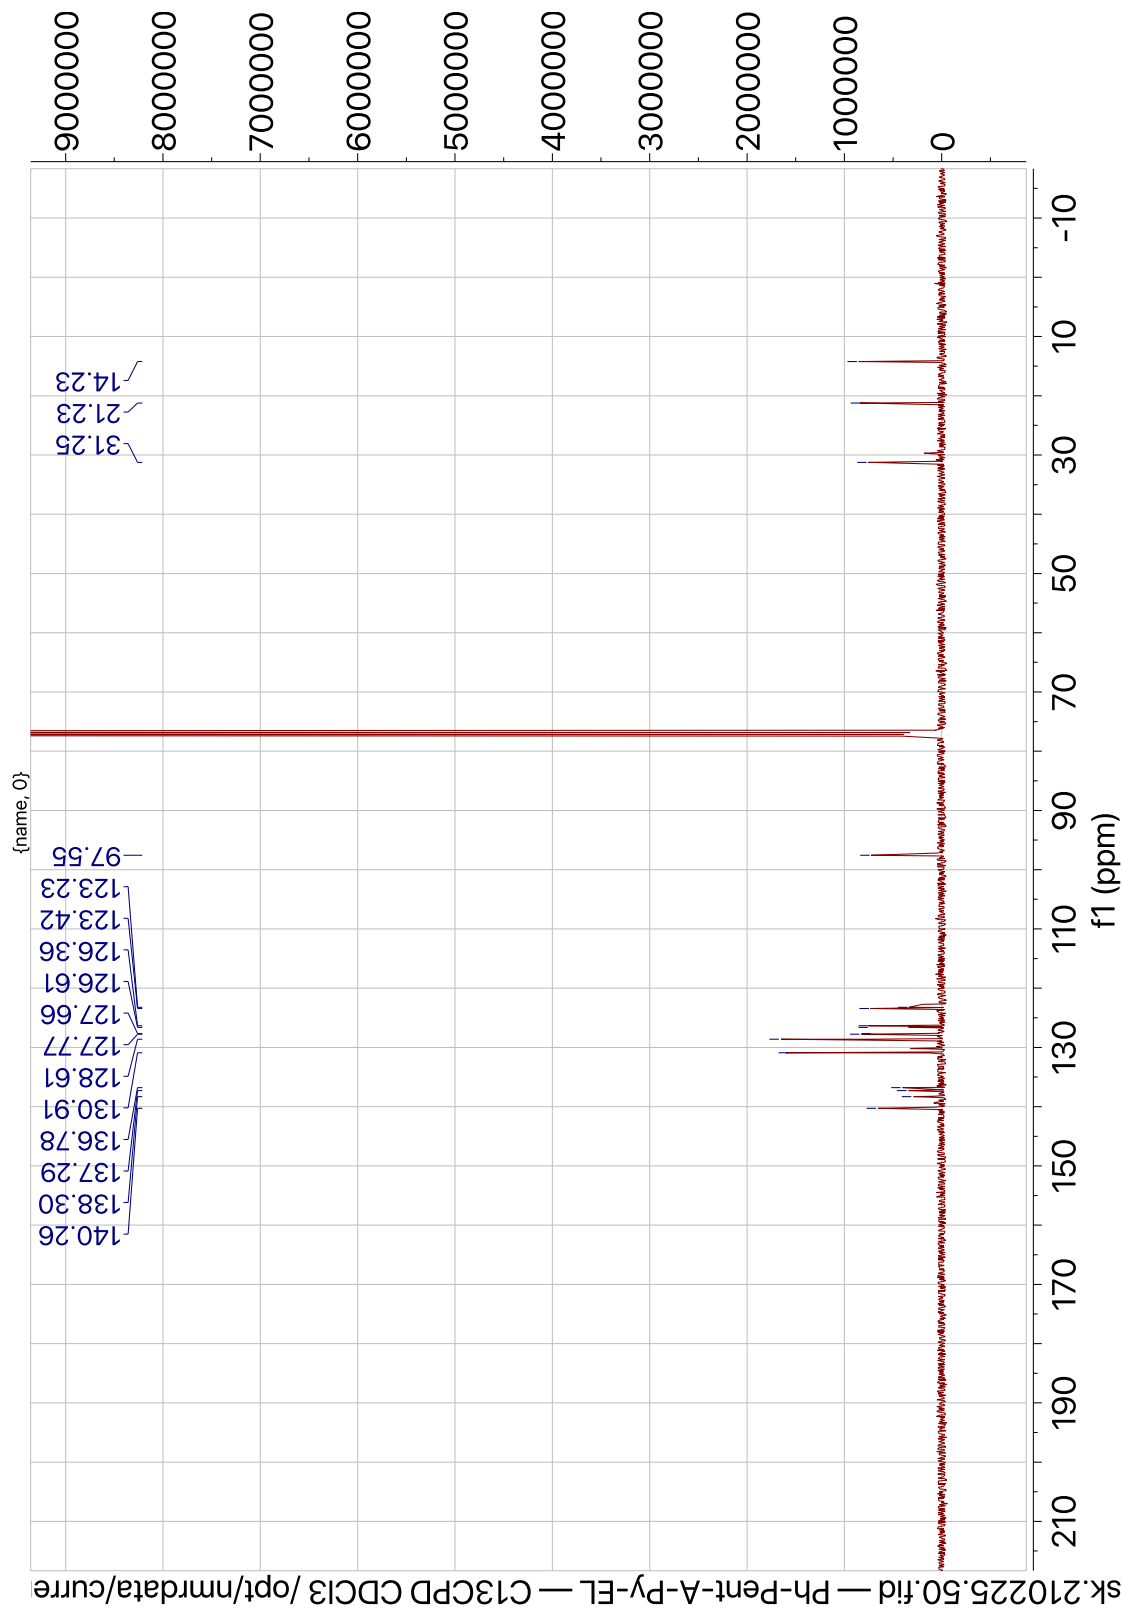

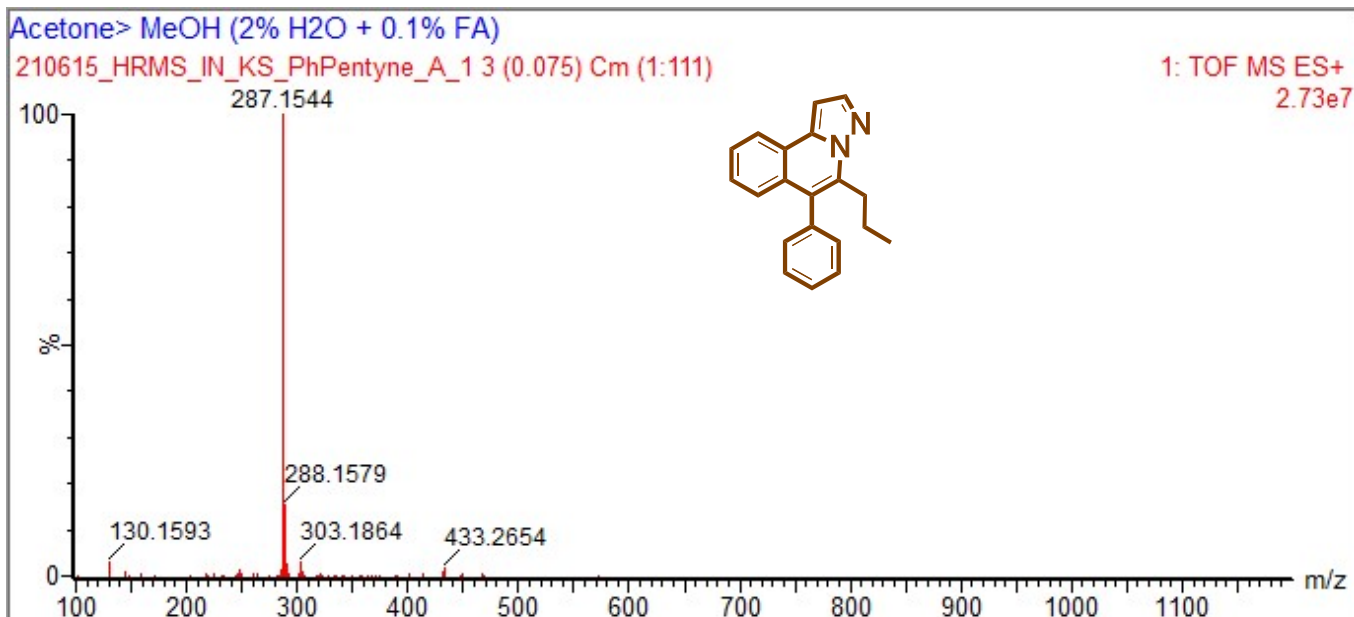

### Single Mass Analysis

Tolerance = 2.0 mDa / DBE: min = -1.5, max = 100.0

Element prediction: Off

Number of isotope peaks used for i-FIT = 3

Monoisotopic Mass, Even Electron Ions

464 formula(e) evaluated with 5 results within limits (all results (up to 1000) for each mass)

Elements Used:

C: 0-50      H: 0-100      N: 0-5      O: 0-3      Na: 0-1      Cl: 0-2

| Mass     | Calc. Mass | mDa  | PPM  | DBE  | Formula          | i...  | Fit Conf % | C  | H  | N | O | Na | Cl |
|----------|------------|------|------|------|------------------|-------|------------|----|----|---|---|----|----|
| 287.1544 | 287.1545   | -0.1 | -0.3 | -1.5 | C13 H29 O2 Cl2   | 71... | 0.00       | 13 | 29 |   | 2 |    | 2  |
| 287.1542 | 287.1542   | 0.2  | 0.7  | 4.5  | C17 H25 Na Cl    | 71... | 0.00       | 17 | 25 |   |   | 1  | 1  |
| 287.1548 | 287.1548   | -0.4 | -1.4 | 12.5 | C20 H19 N2       | 61... | 28.96      | 20 | 19 | 2 |   |    |    |
| 287.1526 | 287.1526   | 1.8  | 6.3  | 3.5  | C14 H24 N2 O2 Cl | 71... | 0.00       | 14 | 24 | 2 | 2 |    | 1  |

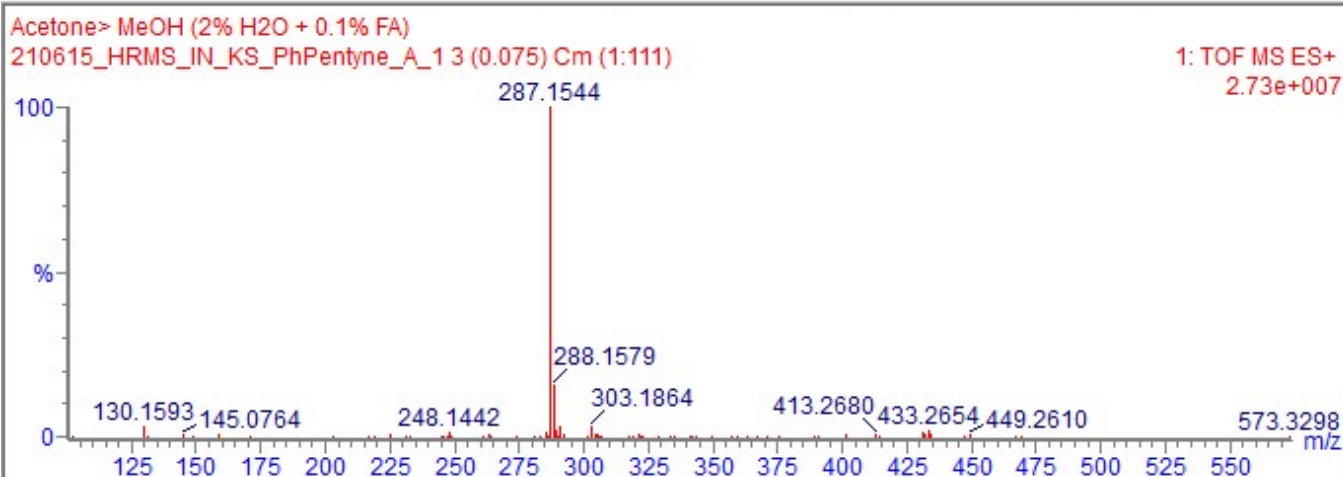

HRMS spectra of **5I**

Compound 5I', <sup>1</sup>H NMR, CDCl<sub>3</sub>, 400 MHz

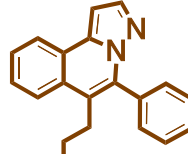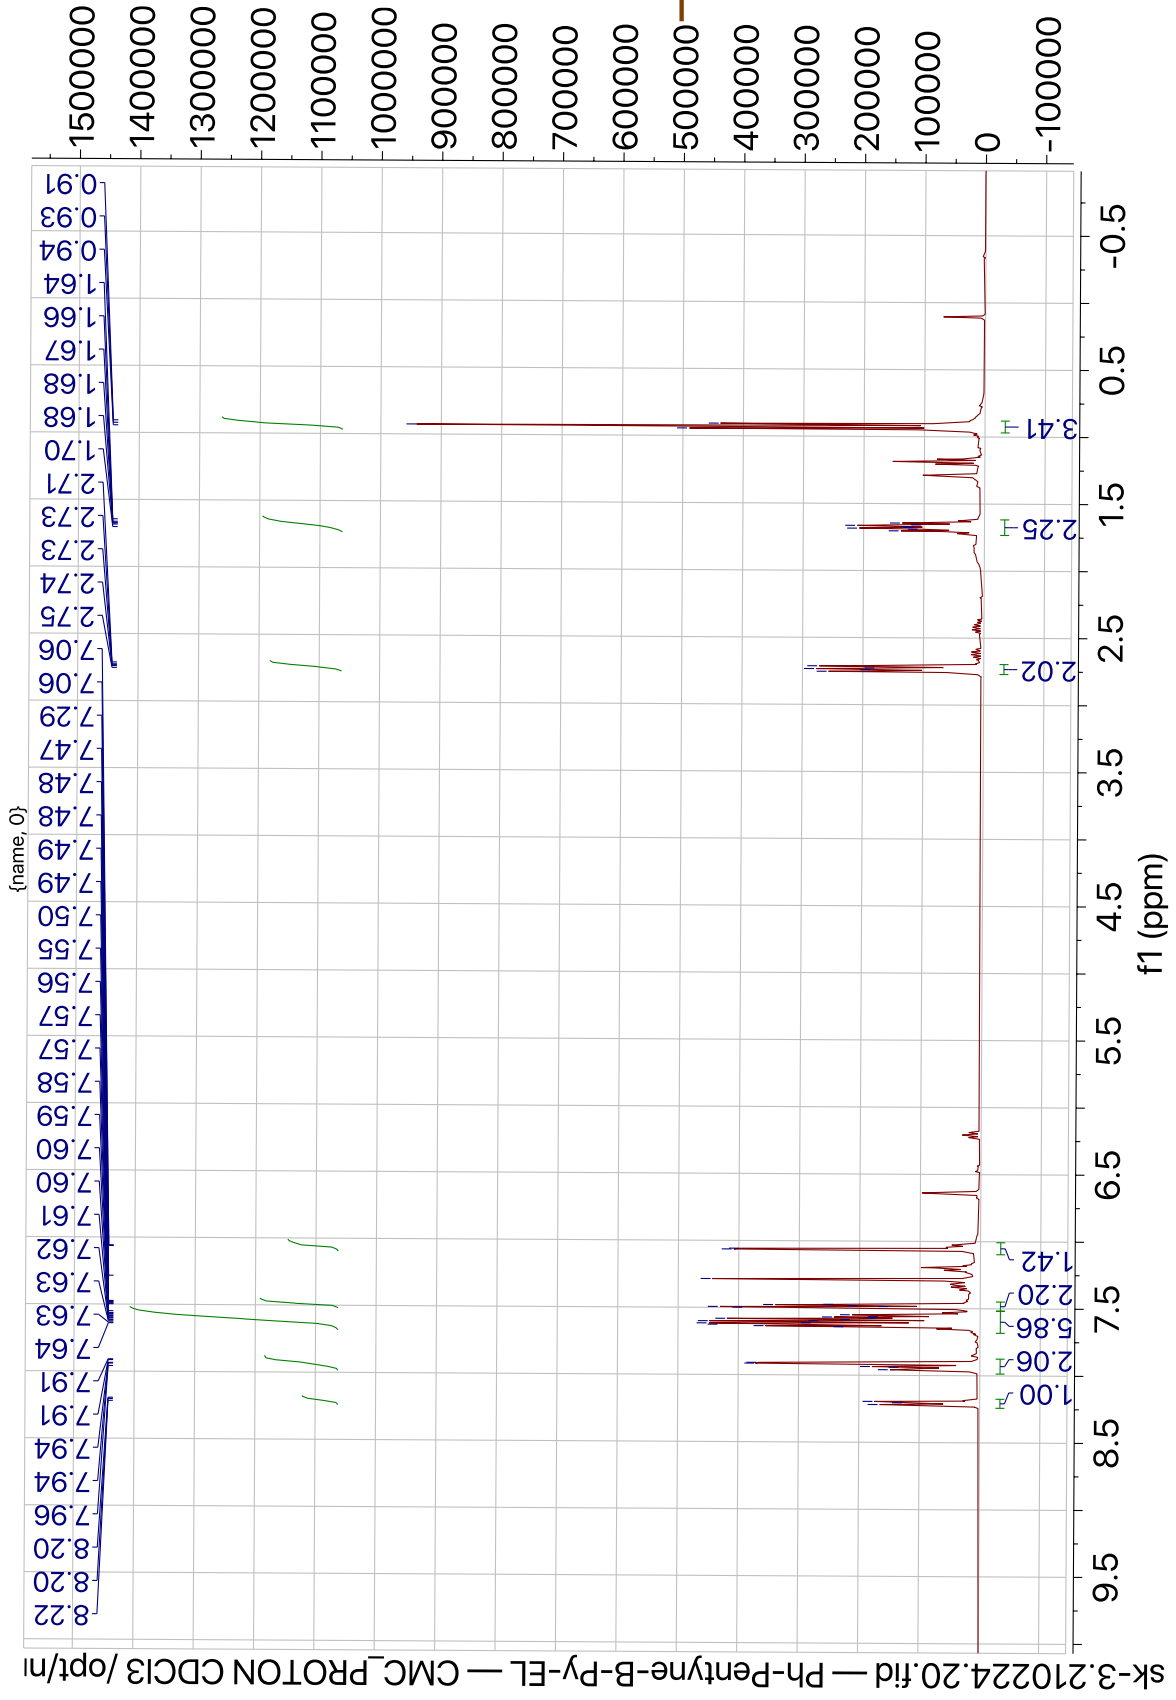

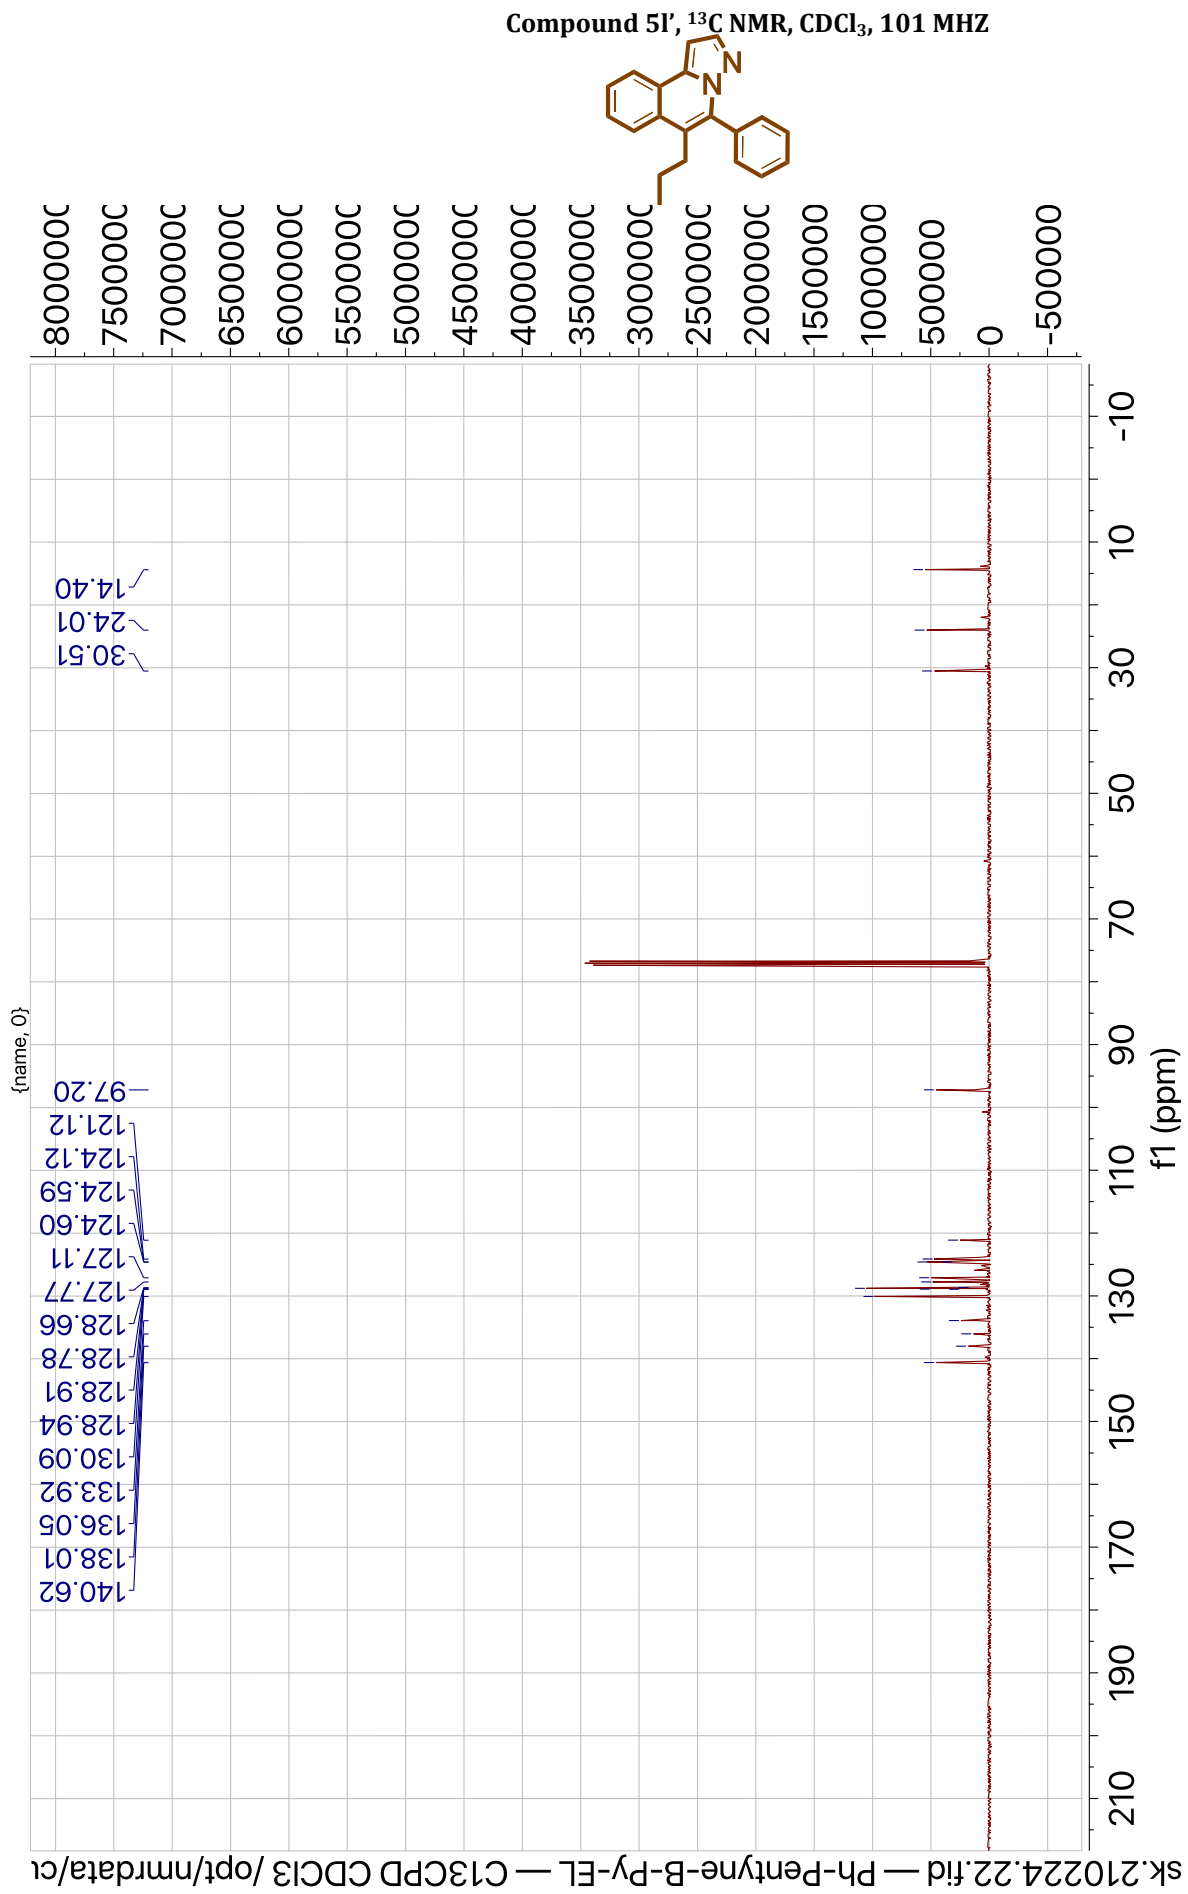



DCM-> MeOH (2% H2O + 0.1% FA)

210615\_HRMS\_IN\_KS\_PhPentyne\_B 1 (0.041) Cm (1:111)

1: TOF MS ES+  
2.52e7

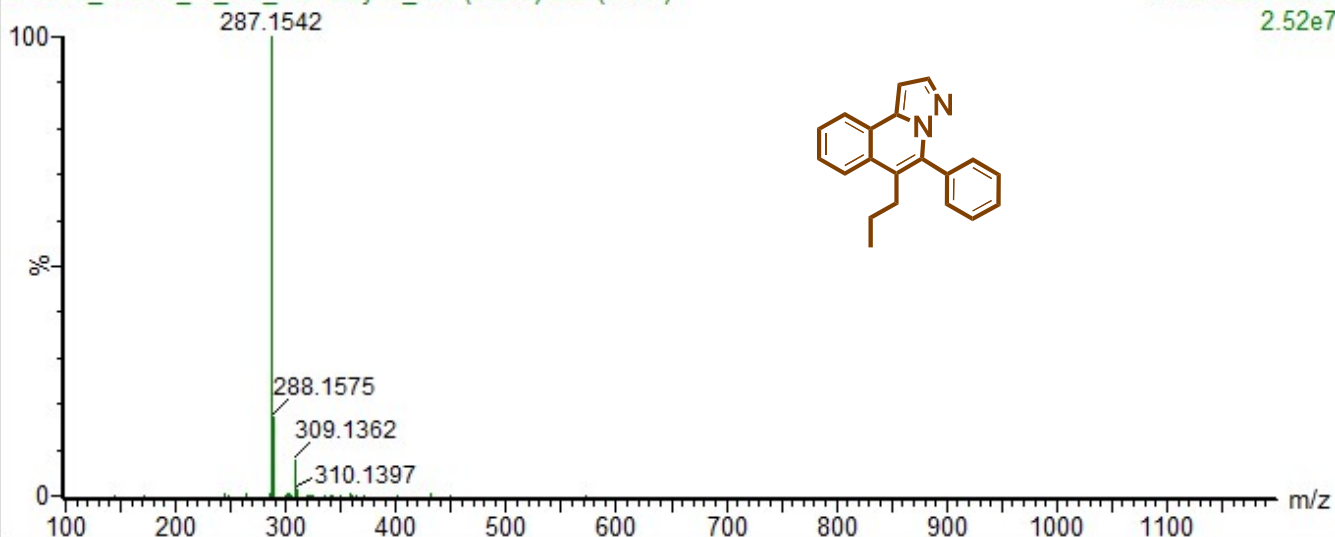

### Single Mass Analysis

Tolerance = 2.0 mDa / DBE: min = -1.5, max = 100.0

Element prediction: Off

Number of isotope peaks used for i-FIT = 3

Monoisotopic Mass, Even Electron Ions

179 formula(e) evaluated with 2 results within limits (all results (up to 1000) for each mass)

Elements Used:

C: 0-50      H: 0-100      N: 0-5      O: 0-3      Na: 0-1

| Mass     | Calc. Mass | mDa  | PPM  | DBE  | Formula       | i...   | Fit Conf % | C  | H  | N | O | Na |
|----------|------------|------|------|------|---------------|--------|------------|----|----|---|---|----|
| 287.1542 | 287.1548   | -0.6 | -2.1 | 12.5 | C20 H19 N2    | 3.0... | 42.44      | 20 | 19 | 2 |   |    |
|          | 287.1524   | 1.8  | 6.3  | 9.5  | C18 H20 N2 Na | 3.0... | 57.56      | 18 | 20 | 2 |   | 1  |

DCM-> MeOH (2% H2O + 0.1% FA)

210615\_HRMS\_IN\_KS\_PhPentyne\_B 1 (0.041) Cm (1:111)

1: TOF MS ES+  
2.52e+007

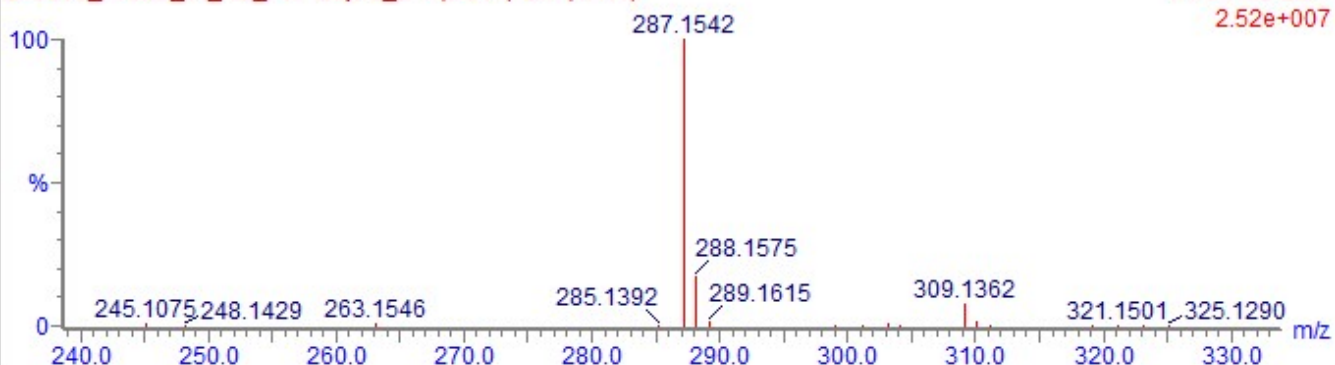

HRMS spectra of 5I'

Compound 5m, <sup>1</sup>H NMR, CDCl<sub>3</sub>, 400 MHz

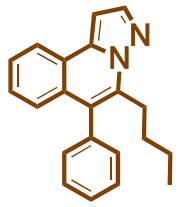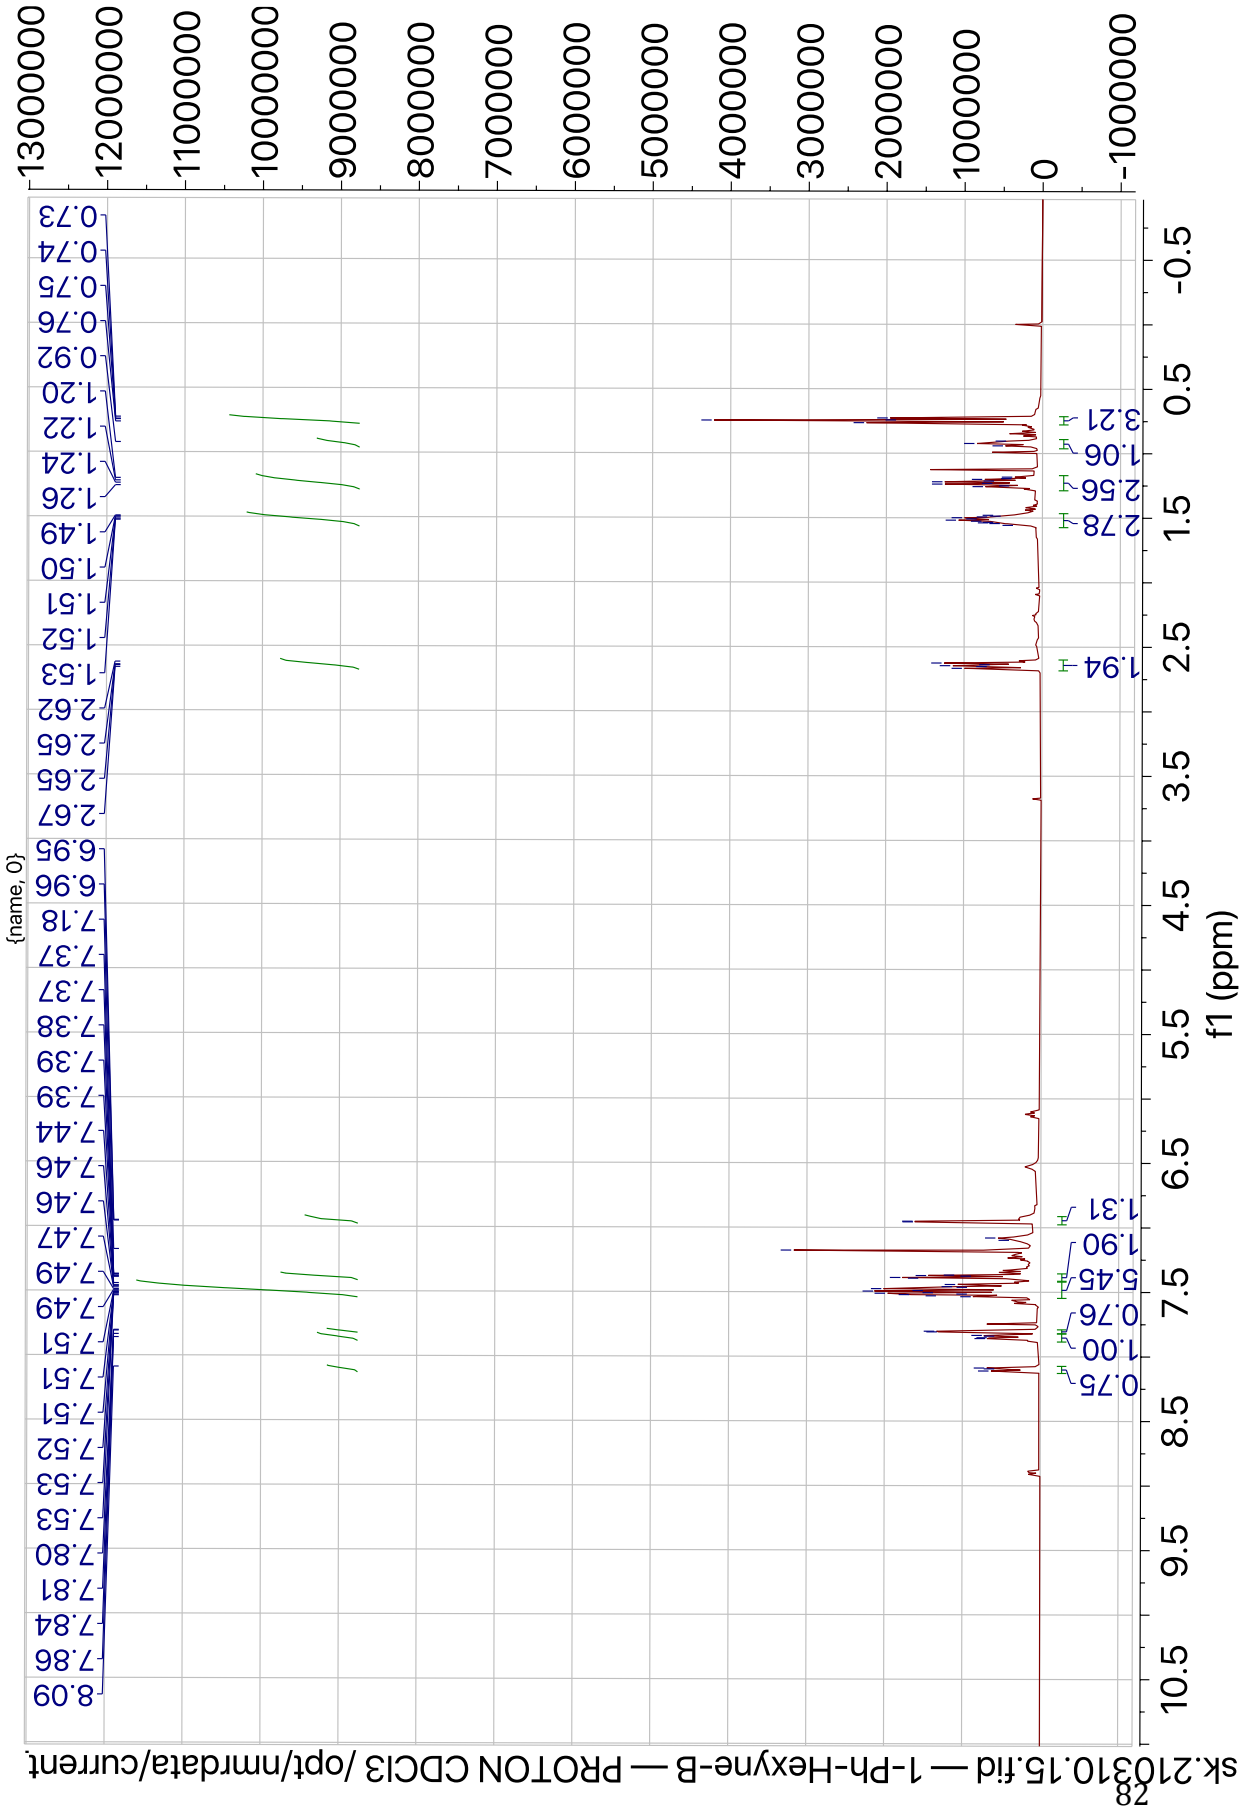

sk.210310.15.fid — 1-Ph-Hexyne-B — PROTON CDCl<sub>3</sub> /opt/nmrdata/current

Compound 5m,  $^{13}\text{C}$  NMR,  $\text{CDCl}_3$ , 101 MHz

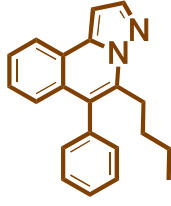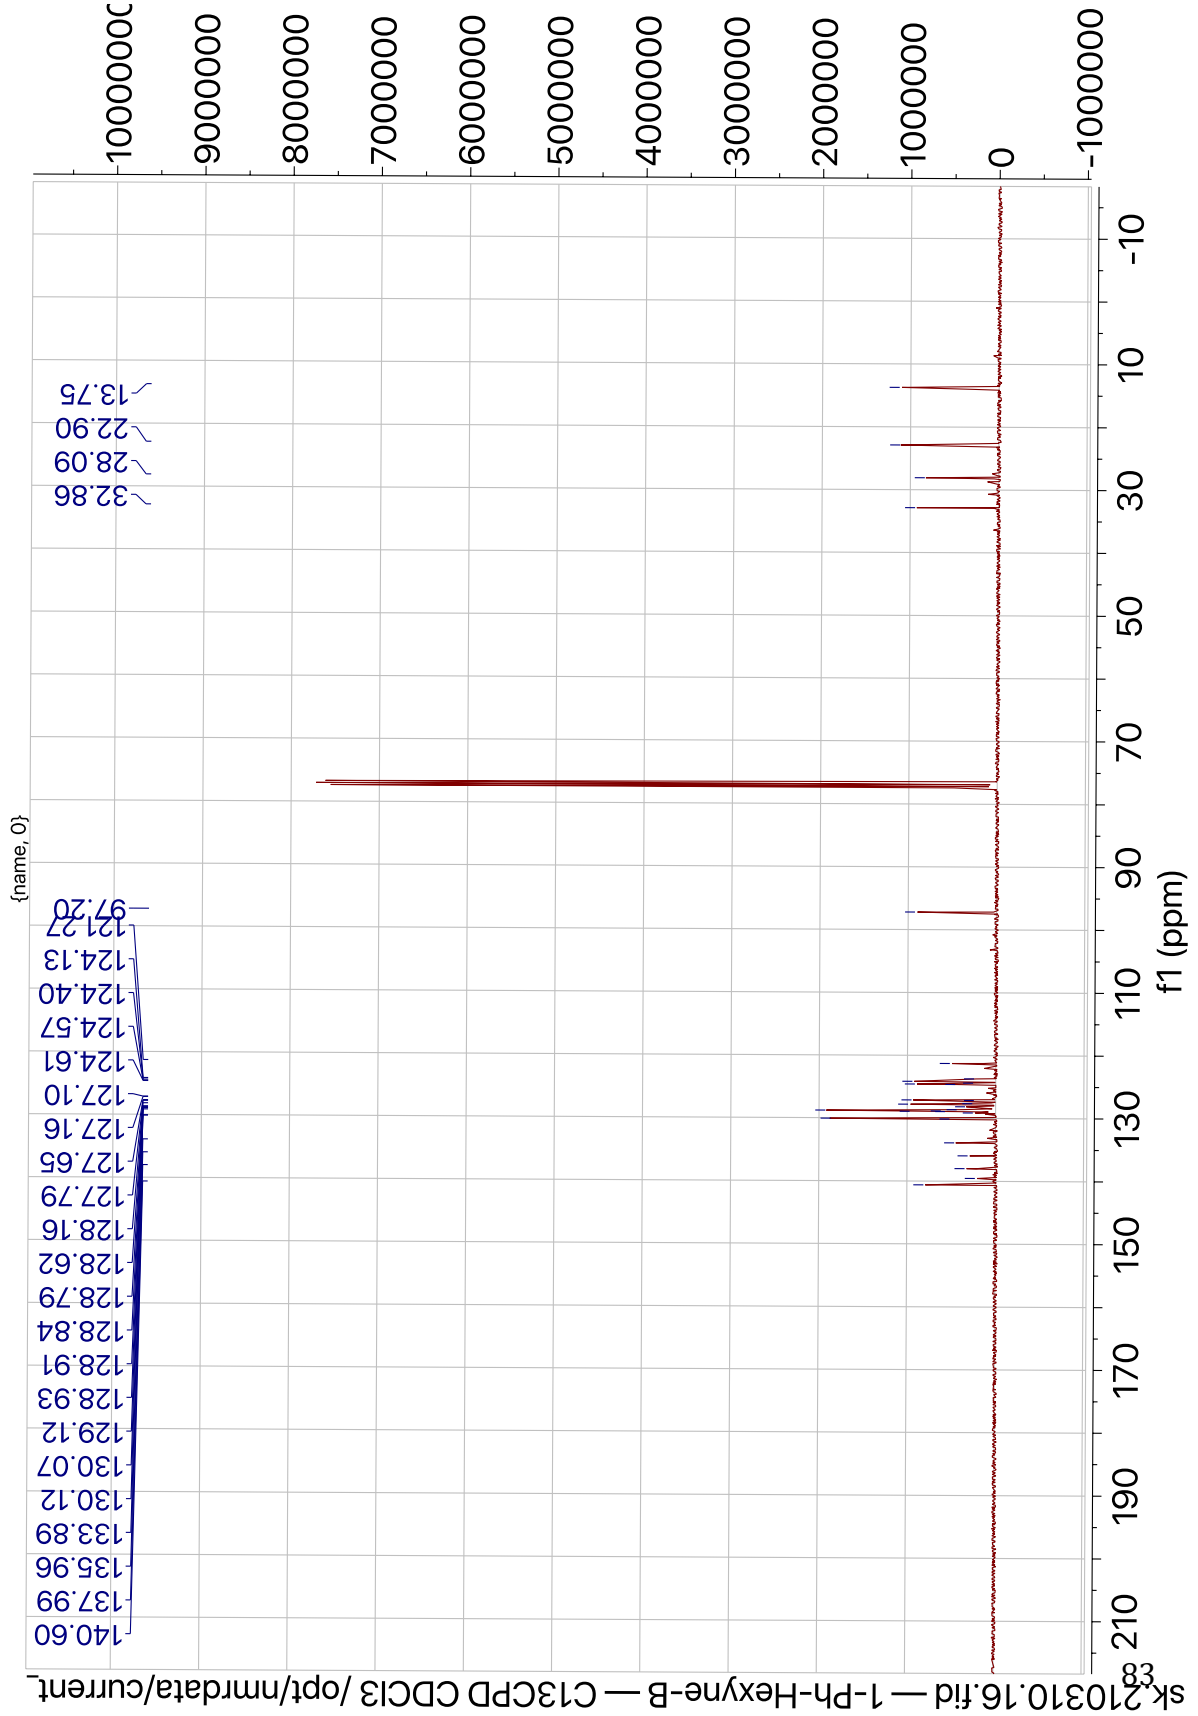

DCM-> MeOH (2% H2O + 0.1% FA)

210615\_HRMS\_IN\_KS\_PhHexyne\_B 2 (0.058) Cm (2:111)

1: TOF MS ES+  
8.18e7

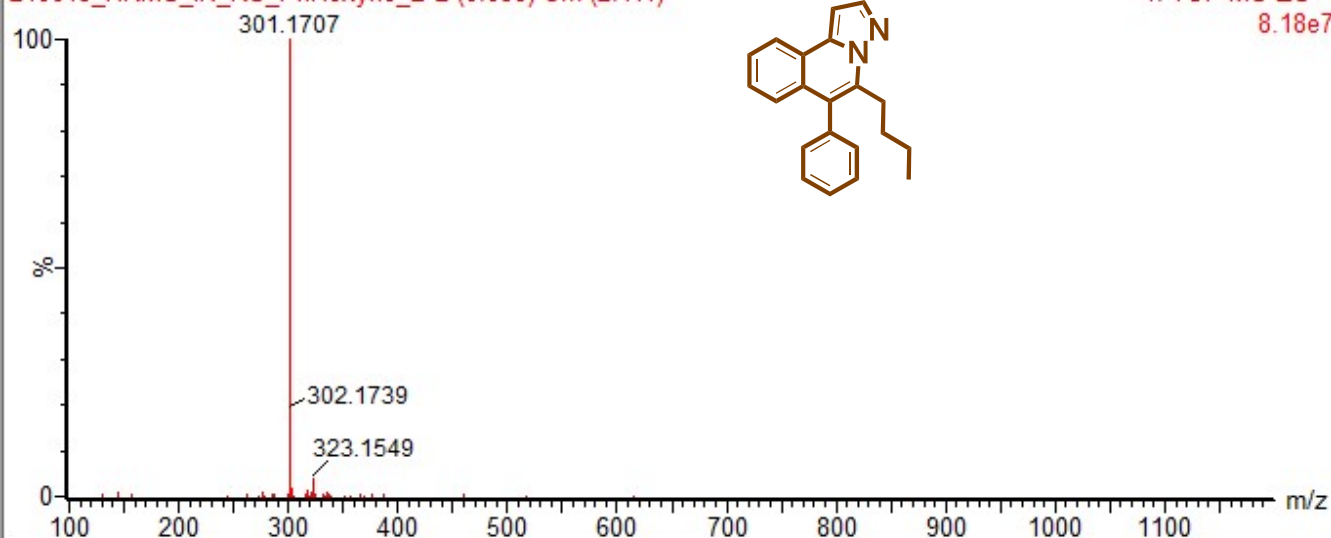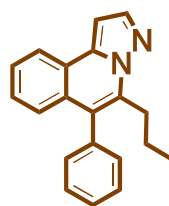

### Single Mass Analysis

Tolerance = 2.0 mDa / DBE: min = -1.5, max = 100.0

Element prediction: Off

Number of isotope peaks used for i-FIT = 3

Monoisotopic Mass, Even Electron Ions

187 formula(e) evaluated with 1 results within limits (all results (up to 1000) for each mass)

Elements Used:

C: 0-50

H: 0-100

N: 0-5

O: 0-3

Na: 0-1

| Mass     | Calc. Mass | mDa | PPM | DBE  | Formula    | i-FIT | i-FIT Norm | Fit Conf % | C  | H  | N | O | Na |
|----------|------------|-----|-----|------|------------|-------|------------|------------|----|----|---|---|----|
| 301.1707 | 301.1705   | 0.2 | 0.7 | 12.5 | C21 H21 N2 | 43.1  | n/a        | n/a        | 21 | 21 | 2 |   |    |

DCM-> MeOH (2% H2O + 0.1% FA)

210615\_HRMS\_IN\_KS\_PhHexyne\_B 2 (0.058) Cm (2:111)

1: TOF MS ES+  
8.18e+007

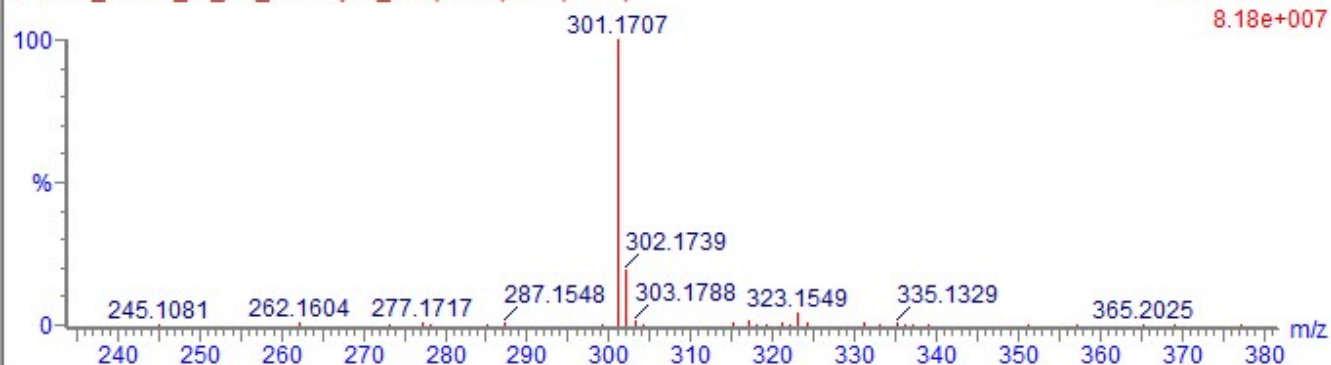

HRMS spectra of **5m**

Compound 5n, <sup>1</sup>H NMR, CDCl<sub>3</sub>, 400 MHz

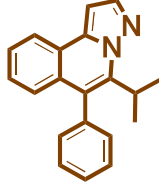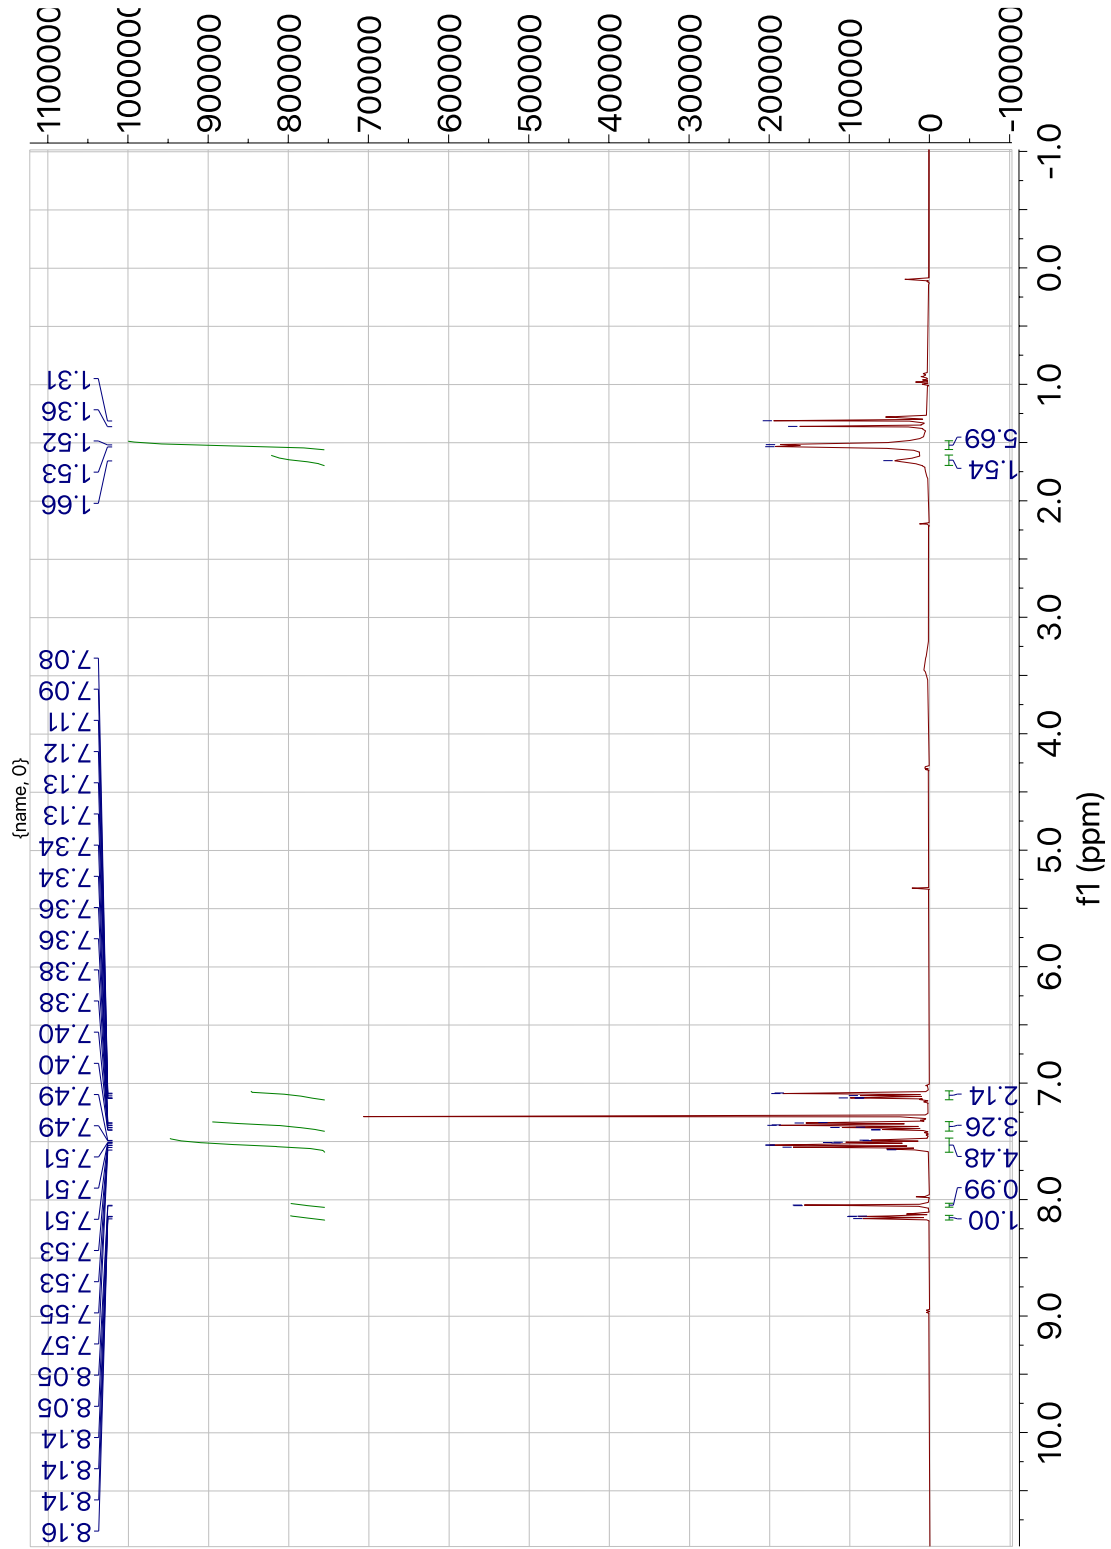

sk.210301.10.fid - Ph-But-3-ol-A-Py-EL - CMC\_PROTON CDCl3 /opt/nmr

Compound 5n, <sup>13</sup>C NMR, CDCl<sub>3</sub>, 101 MHz

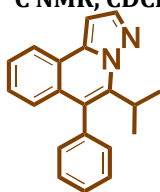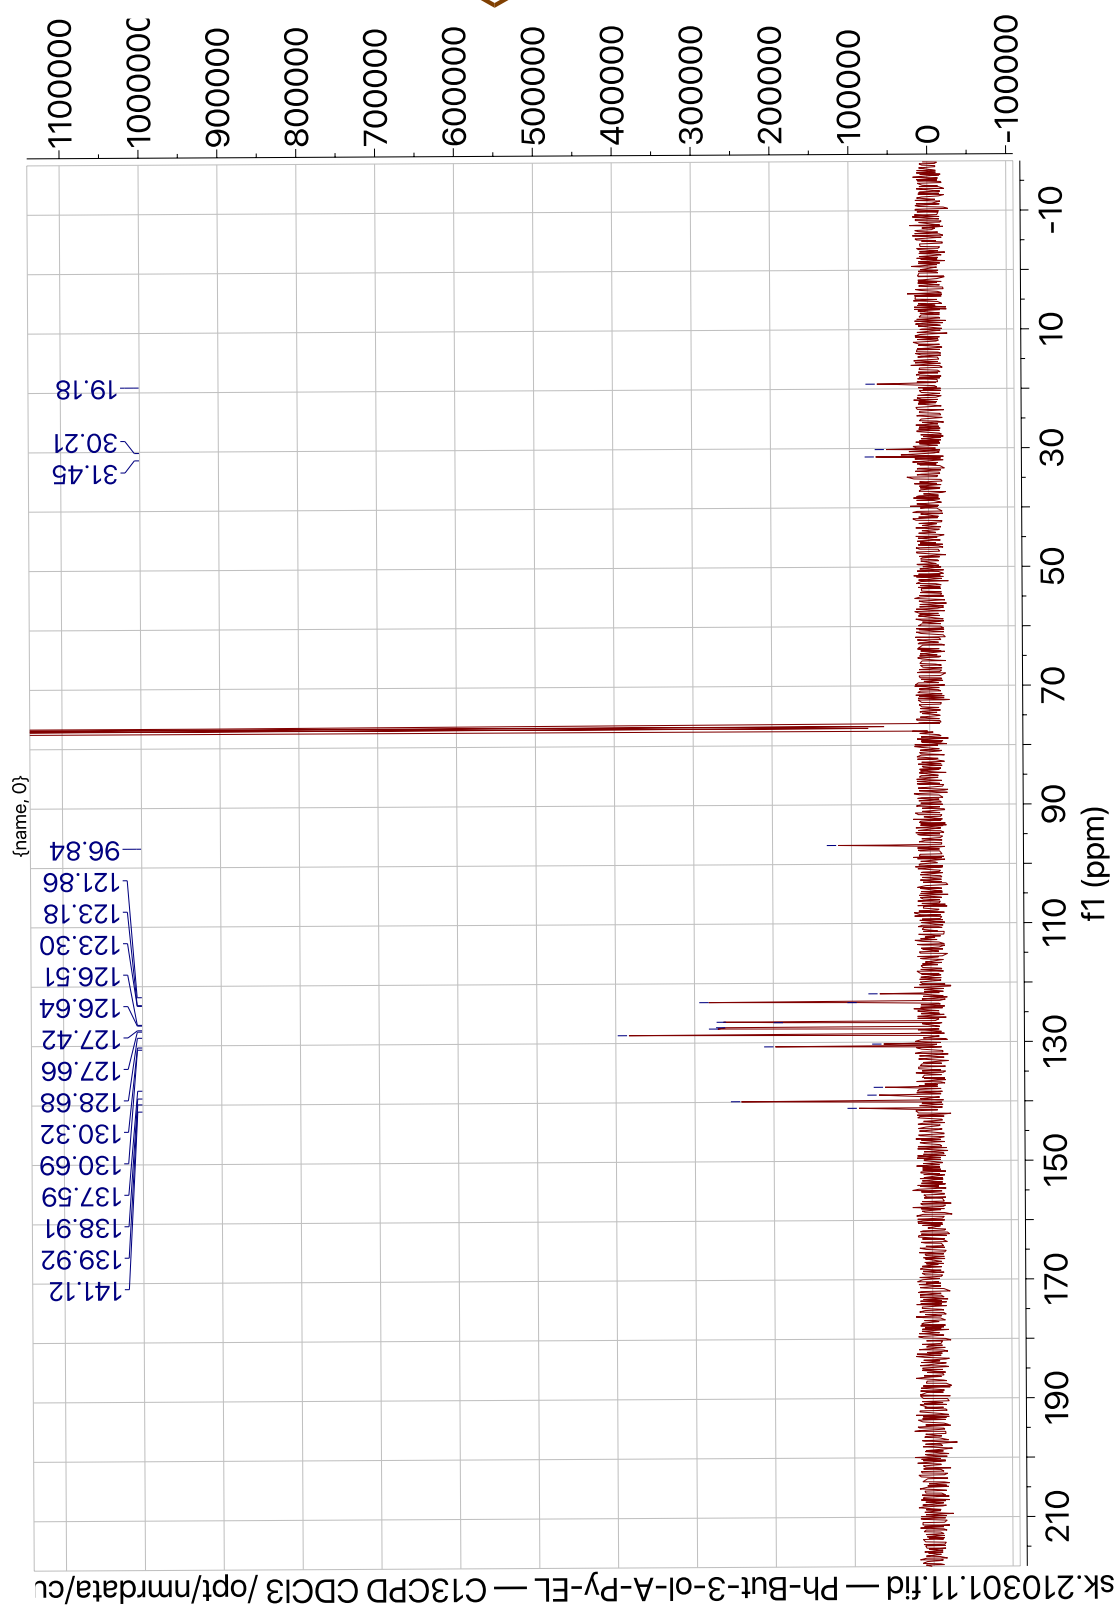

DCM-> MeOH (2% H2O + 0.1% FA)

210615\_HRMS\_IN\_KS\_PhBut3OI\_A 33 (0.611) Cm (26:111)

1: TOF MS ES+  
4.31e7

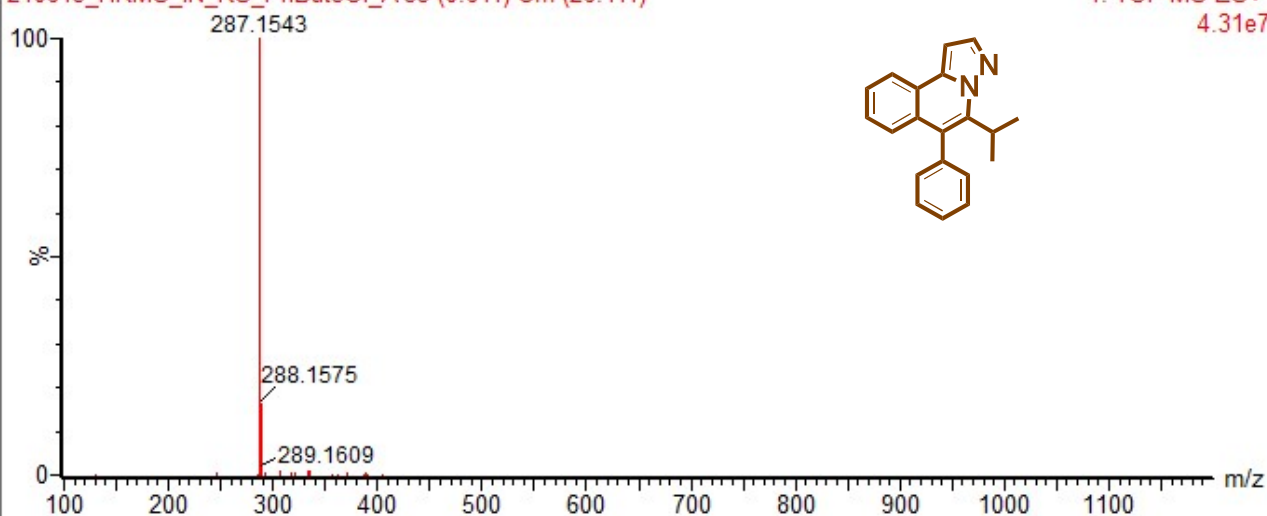

### Single Mass Analysis

Tolerance = 2.0 mDa / DBE: min = -1.5, max = 100.0

Element prediction: Off

Number of isotope peaks used for i-FIT = 3

Monoisotopic Mass, Even Electron Ions

179 formula(e) evaluated with 2 results within limits (all results (up to 1000) for each mass)

Elements Used:

C: 0-50

H: 0-100

N: 0-5

O: 0-3

Na: 0-1

| Mass     | Calc. Mass | mDa  | PPM  | DBE  | Formula       | i..   | Fit Conf % | C  | H  | N | O | Na |
|----------|------------|------|------|------|---------------|-------|------------|----|----|---|---|----|
| 287.1543 | 287.1548   | -0.5 | -1.7 | 12.5 | C20 H19 N2    | 30... | 79.55      | 20 | 19 | 2 |   |    |
|          | 287.1524   | 1.9  | 6.6  | 9.5  | C18 H20 N2 Na | 31... | 20.45      | 18 | 20 | 2 |   | 1  |

DCM-> MeOH (2% H2O + 0.1% FA)

210615\_HRMS\_IN\_KS\_PhBut3OI\_A 33 (0.611) Cm (26:111)

1: TOF MS ES+  
4.31e+007

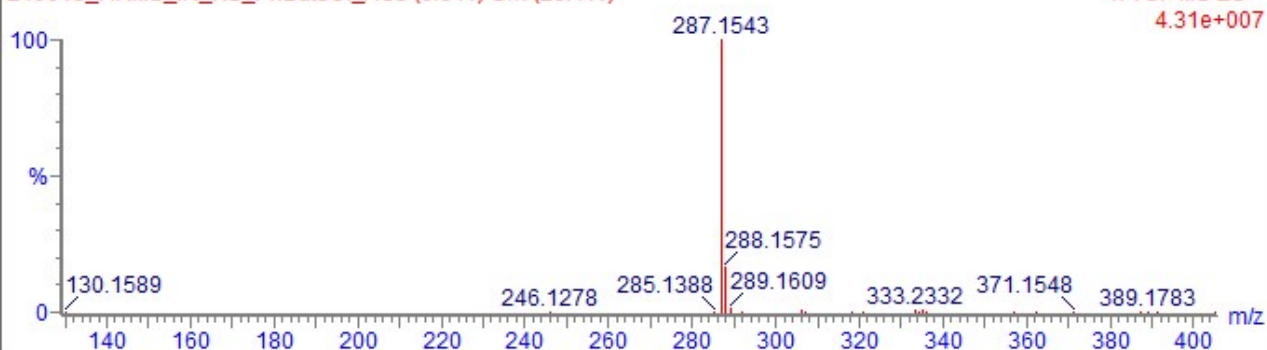

HRMS spectra of 5n

## References:

1. Wakade, S. B., Tiwari, D. K., Pushpendra, M. P., Tiwari, D. K. *Tetrahedron* **2019**, *75*, 4024-4030.
2. Huang, Z.-B., Zhao, Y.-W., Wang, H.-Y., Shi, D.-Q. *J. Het. Chem.* **2014**, *51*, 309-313.
3. Park, K., Bae, G., Moon, J., Choe, J.; Song, K. H.; Lee, S. *J. Org. Chem.* **2010**, *75*, 6244-6251.
